# Supplementary material
Source: PubMed Central journal article supplement (PMC5555598)
Supplement: NIHMS889463-supplement-Supplemental.pdf [file NIHMS889463-supplement-Supplemental.pdf]

Supporting Information  
for  
**“Six-coordinate iron(II) and cobalt(II) paraSHIFT agents for measuring  
temperature by magnetic resonance spectroscopy”**

Pavel B. Tsitovich,\* Jordan M. Cox, Jason B. Benedict and  
Janet R. Morrow\*

Department of Chemistry, University at Buffalo, State University of New York, Buffalo,  
NY 14260

**Table of Contents**

|                                                                                                 |    |
|-------------------------------------------------------------------------------------------------|----|
| 1) Instrumentation                                                                              | 2  |
| 2) Materials                                                                                    | 2  |
| 3) Reaction Schemes                                                                             | 3  |
| 4) Overlap of crystal structures                                                                | 4  |
| 5) $^1\text{H}$ NMR data for $[\text{Fe}(\text{MPT})]^{2+}$                                     | 6  |
| 6) $^1\text{H}$ NMR data for $[\text{Fe}(\text{AMPT})]^{2+}$                                    | 13 |
| 7) $^1\text{H}$ NMR data for $[\text{Co}(\text{MPT})]^{2+}$                                     | 18 |
| 8) $^1\text{H}$ NMR data for $[\text{Fe}(\text{PT})]^{2+}$                                      | 25 |
| 9) $^1\text{H}$ NMR data for $[\text{Fe}(\text{TMPC})]^{2+}$                                    | 26 |
| 10) $^1\text{H}$ NMR data for $[\text{Fe}(\text{TMPC})]^{2+}$ in water                          | 34 |
| 11) $^1\text{H}$ NMR data for $[\text{Co}(\text{TMPC})]^{2+}$                                   | 35 |
| 12) Longitudinal relaxation times ( $T_1$ ) of hyperfine-shifted proton resonances              | 43 |
| 13) $^1\text{H}$ NMR data for $[\text{Fe}(\text{TPC})]^{2+}$                                    | 44 |
| 14) $^1\text{H}$ NMR data for $[\text{Co}(\text{TPC})]^{2+}$                                    | 45 |
| 15) pH dependence of $^1\text{H}$ NMR resonances of $[\text{Fe}(\text{TMPC})]^{2+}$             | 46 |
| 16) Acid dissociation studies                                                                   | 47 |
| 17) $^1\text{H}$ NMR temperature dependence of $[\text{Fe}(\text{TMPC})]^{2+}$ in serum albumin | 49 |
| 18) Appendix 1. $^1\text{H}$ and $^{13}\text{C}$ NMR spectra of TMPC, MPT and TPC ligands       | 51 |
| 19) Appendix 2. X-ray diffraction data                                                          | 54 |

## Instrumentation

Varian Inova 500 MHz NMR spectrometer equipped with FTS Systems TC-84 Kinetics Air Jet Temperature Controller was used to collect  $^1\text{H}$  NMR spectra.  $^{13}\text{C}$  NMR spectra were acquired using a Varian Mercury 300 MHz NMR spectrometer operating at 75 MHz. A Thermo Scientific Orion 9826BN NMR micro pH electrode connected to a SympHony SB20 pH meter and the Orion 8115BNUWP Ross-ultra semi-micro pH electrode connected to a Titrino 702 pH meter were used for pH measurements. ThermoFinnigan LCQ Advantage IonTrap LC/MS equipped with a Surveyor HPLC system was used to collect mass spectral data.

## Materials

All solvents and reagents were reagent grade, and they were used as received without additional purification. 1,4,7-Triazacyclononane (TACN) was purchased from TCI America (Portland, OR). 1,4,7,10-Tetraazacyclododecane (CYCLEN) and Iron(II) trifluoromethanesulfonate (98%) were obtained from Strem Chemicals, Inc. (Newburyport, MA). *N,N*-Diisopropylethylamine (DIPEA), 3-(trimethylsilyl)propionic acid sodium salt (TMSP) and albumin from porcine serum were obtained from Sigma-Aldrich (St. Louis, MO). 2-Bromomethyl-6-methylpyridine (97%), 2-picolyl chloride hydrochloride, Cobalt(II) chloride hexahydrate (98%), Cobalt(II) nitrate hexahydrate (97%) and Iron(II) chloride tetrahydrate (98%) were received from Alfa Aesar (Ward Hill, MA). Basic alumina (50-200  $\mu\text{m}$ ) was purchased from Dynamic Adsorbents, Inc. (Norcross, GA).

**1,4,7-Tris[(6-methyl-2-pyridyl)methyl]-1,4,7-triazacyclononane (MPT)** was prepared using a similar procedure as described for TMPC synthesis. TACN (0.34 g, 2.62 mmol), 2-bromomethyl-6-methylpyridine (1.46 g, 7.86 mmol, 3.0 equiv.) and DIPEA (2.1 mL, 11.8 mmol, 4.5 equiv.) were stirred in 50 mL of acetonitrile at 70  $^{\circ}\text{C}$  for 2.5 hours (Scheme S1). After extraction with chloroform, the crude product was subjected to basic  $\text{Al}_2\text{O}_3$  column chromatography using 1 to 10% of methanol in methylene chloride as the eluting solvent. Yield: 0.72 g, 1.62 mmol, 62%.  $^1\text{H}$  NMR, 500 MHz ( $\text{CDCl}_3$ , ppm):  $\delta$  = 7.49 t (3H, Ar), 7.31 d (3H, Ar), 6.95 d (3H, Ar), 3.77 s (6H, 3 $\text{CH}_2$ ), 2.85 s (12H, 6 $\text{CH}_2$ ), 2.47 s (9H, 3 $\text{CH}_3$ ).  $^{13}\text{C}$  NMR, 75 MHz ( $\text{CDCl}_3$ , ppm):  $\delta$  = 159.75, 157.20, 136.35, 121.08, 119.82, 64.79, 55.80, 24.32. ESI-MS ( $m/z$ ):  $[\text{M}+\text{H}^+]$ , calculated: 445.3, found: 445.3 (100%).

**1,4,7,10-Tetrakis(2-pyridylmethyl)-1,4,7,10-tetraazacyclododecane (TPC)** was prepared using a similar procedure as described for TMPC synthesis. CYCLEN (0.20 g, 1.16 mmol), 2-picolyl chloride hydrochloride (0.76 g, 4.64 mmol, 4.0 equiv.) and DIPEA (2.0 mL, 11.6 mmol, 10 equiv.) were stirred in 30 mL of acetonitrile at 80  $^{\circ}\text{C}$  for 2 hours (Scheme S1). After extraction with chloroform, the crude product was subjected to basic  $\text{Al}_2\text{O}_3$  column chromatography using 1 to 4% of methanol in methylene chloride as the eluting solvent. Yield: 0.47 g, 0.85 mmol, 73%.  $^1\text{H}$  NMR, 500 MHz ( $\text{CDCl}_3$ , ppm):  $\delta$  = 8.48 d (4H, Ar), 7.69 d (4H, Ar), 7.43 t (4H, Ar), 7.09 t (4H, Ar), 3.66 s (8H, 4 $\text{CH}_2$ ), 2.79 s (16H, 8 $\text{CH}_2$ ).  $^{13}\text{C}$  NMR, 75 MHz ( $\text{CDCl}_3$ , ppm):  $\delta$  = 160.07, 148.85, 136.15, 122.92, 121.67, 61.54, 53.34. ESI-MS ( $m/z$ ):  $[\text{M}+\text{Na}^+]^+$ , calculated: 559.3, found: 559.4 (100%).

## Reaction Schemes

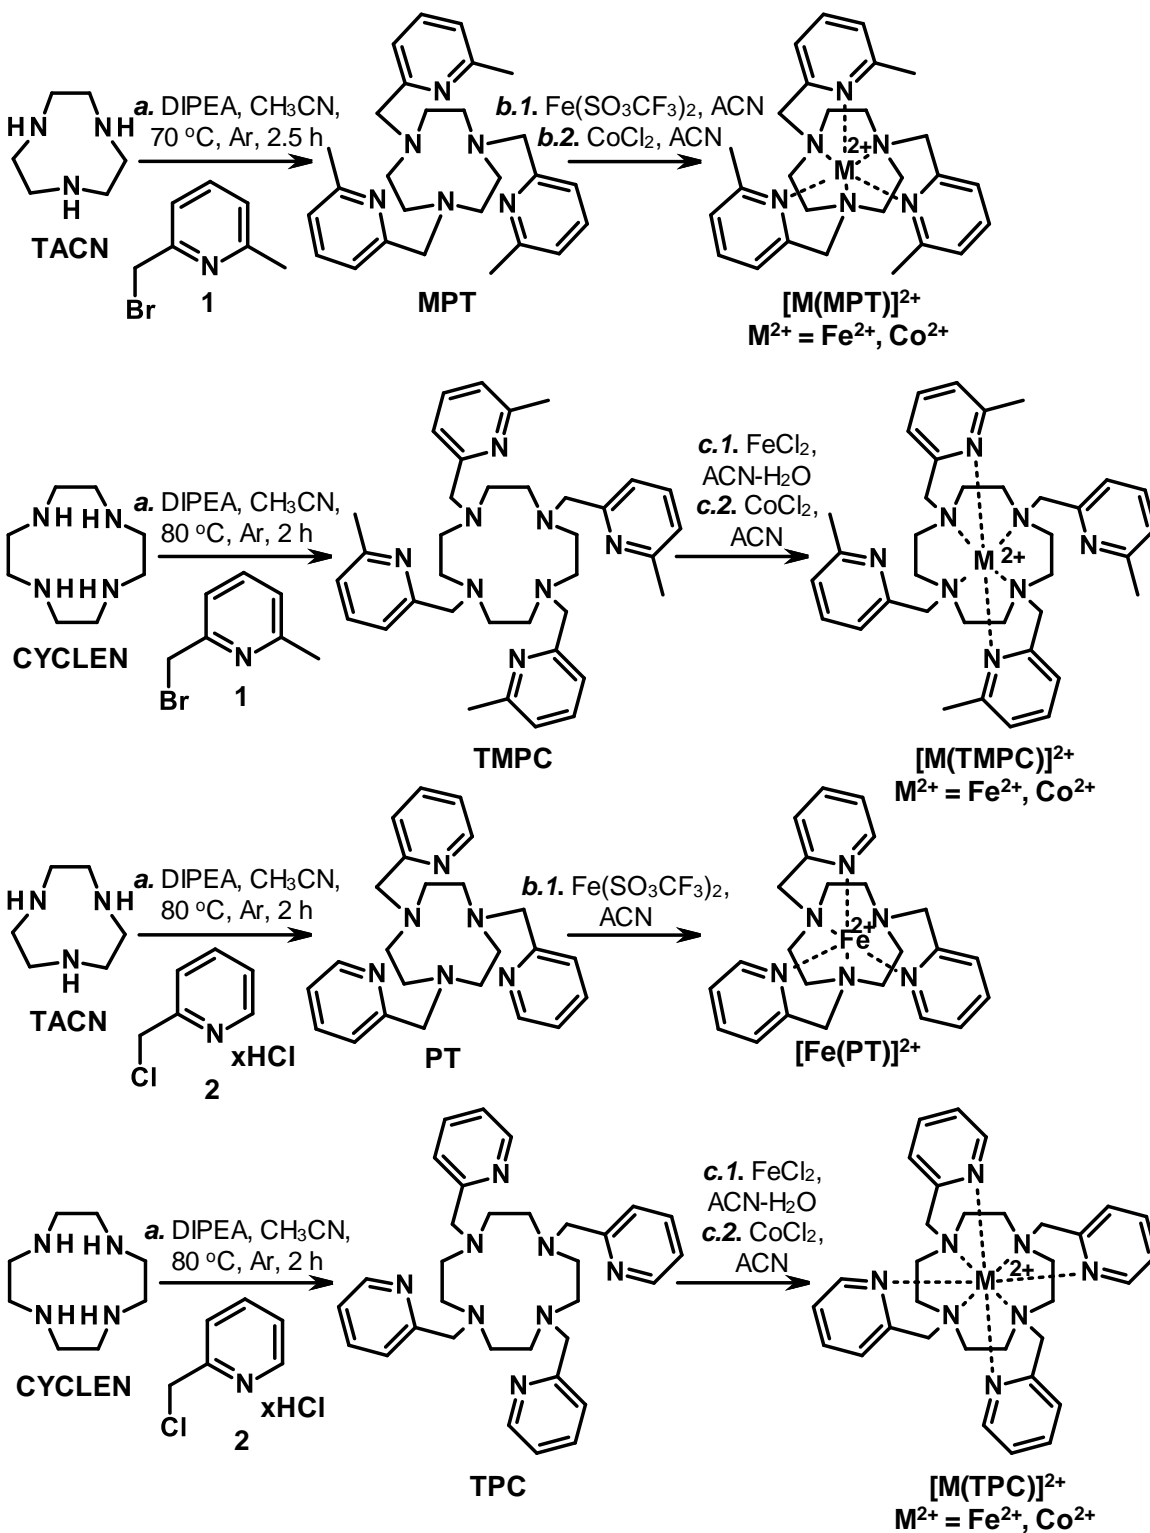

**Scheme S1.** Synthesis of MPT, TMPC, PT, TPC ligands and  $[\text{M}(\text{MPT})]^{2+}$ ,  $[\text{M}(\text{TMPC})]^{2+}$ ,  $[\text{Fe}(\text{PT})]^{2+}$ ,  $[\text{M}(\text{TPC})]^{2+}$  complexes ( $\text{M}^{2+} = \text{Fe}^{2+}, \text{Co}^{2+}$ ).

## Overlap of crystal structures

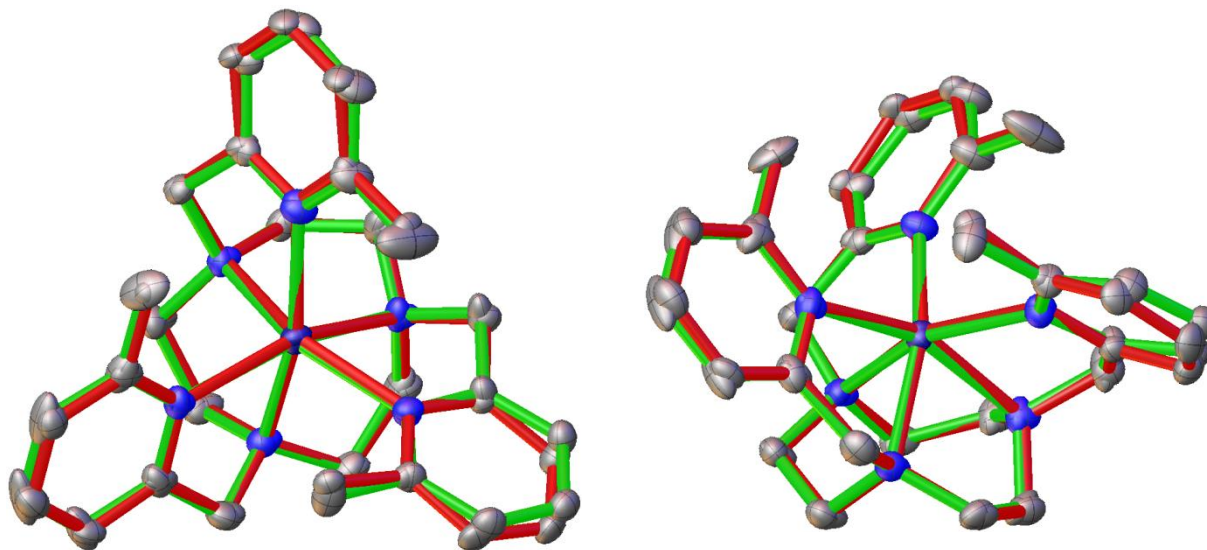

**Figure S1.** The overlay of the  $[\text{Fe}_4(\text{MPT})]^{2+}$  (red) and  $[\text{Co}(\text{MPT})]^{2+}$  (green) crystal structures.

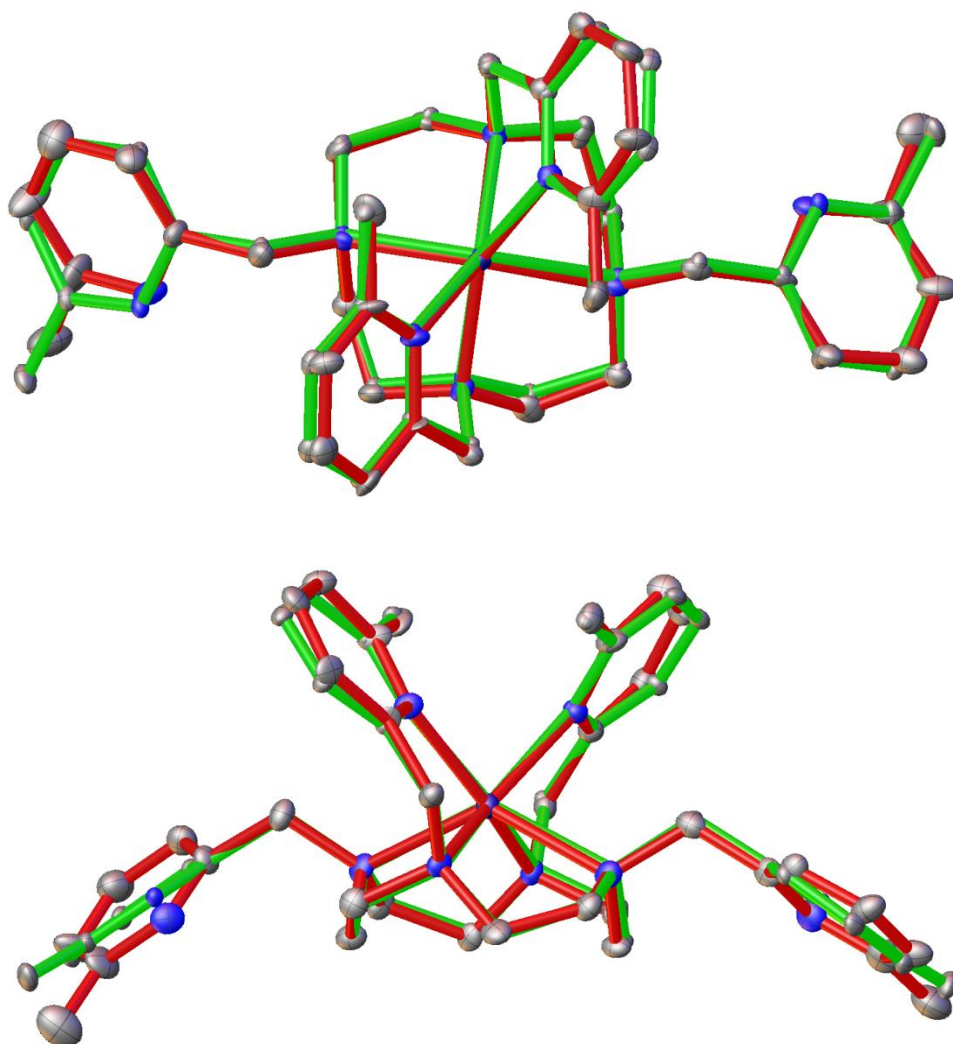

**Figure S2.** The overlay of the  $[\text{Fe}(\text{TMPC})]^{2+}$  (red) and  $[\text{Co}(\text{TMPC})]^{2+}$  (green) crystal structures.

# $^1\text{H}$ NMR data for $[\text{Fe}(\text{MPT})]^{2+}$

25 °C

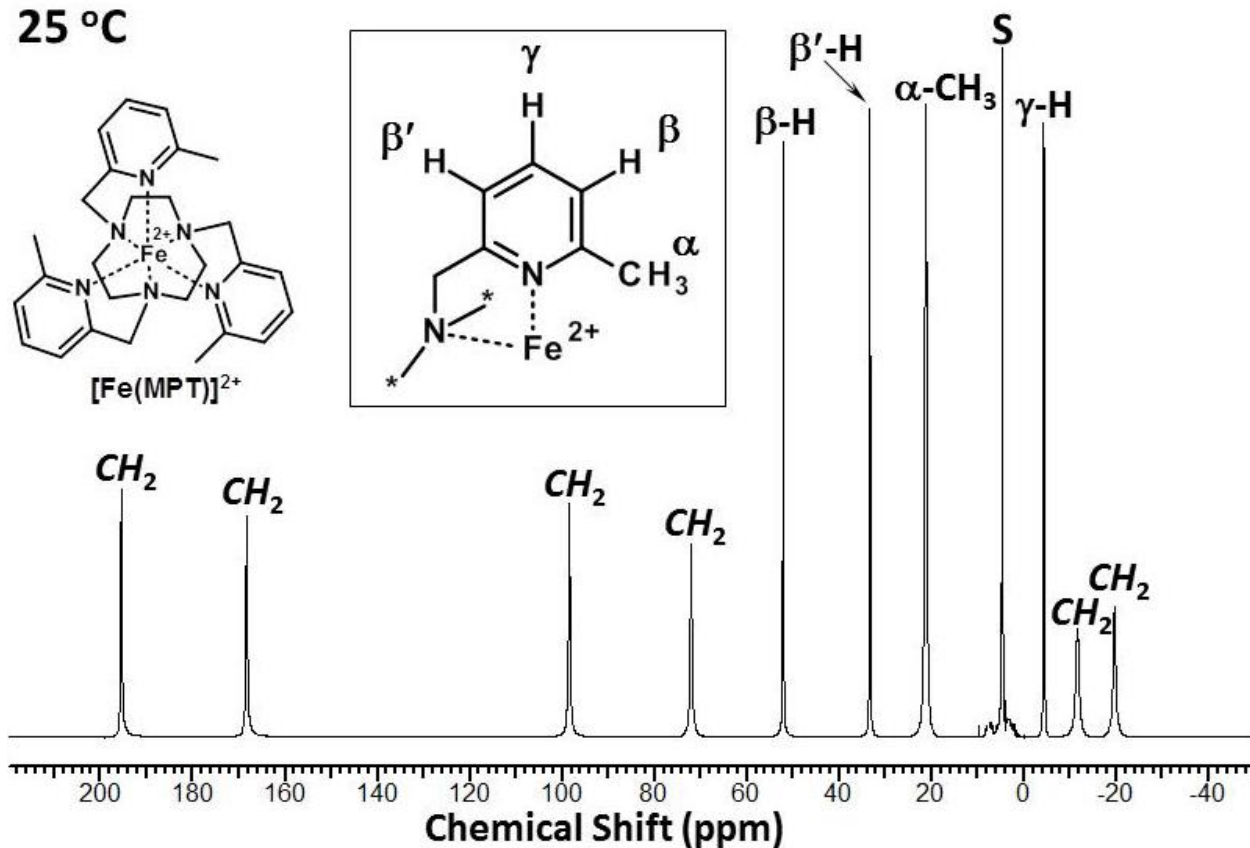

**Figure S3.**  $^1\text{H}$  NMR spectrum of 36 mM  $[\text{Fe}(\text{MPT})]^{2+}$  at 25 °C in 100 mM NaCl,  $\text{D}_2\text{O}$ , pD 7.60. Aromatic protons and their  $^1\text{H}$  NMR resonances are labeled with  $\beta$ ,  $\beta'$  and  $\gamma$ , while solvent peak is labeled with "s".

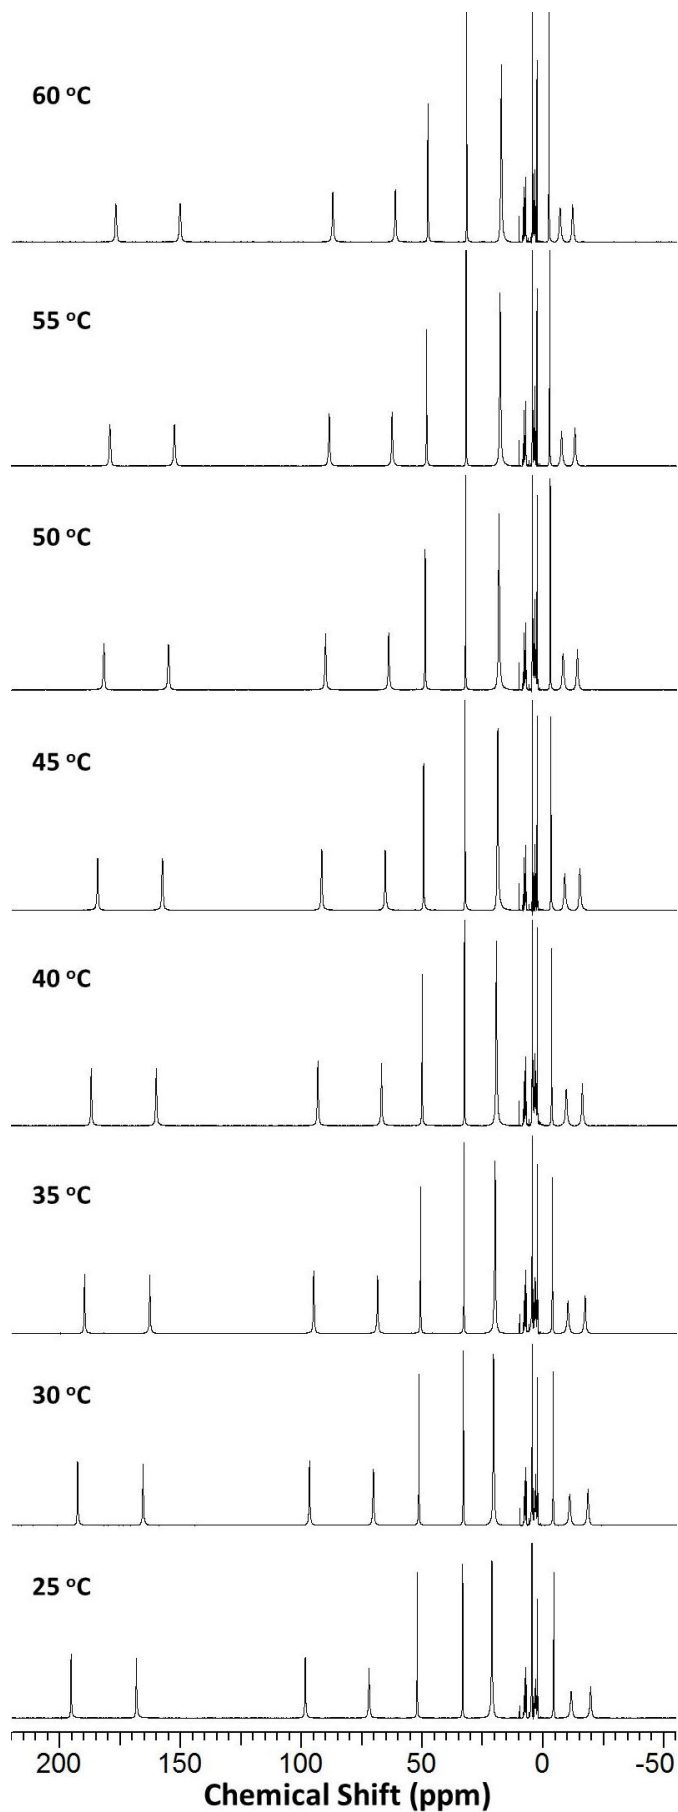

**Figure S4.** Variable temperature <sup>1</sup>H NMR spectra of [Fe(MPT)]<sup>2+</sup> at 25 to 60 °C in 100 mM NaCl, D<sub>2</sub>O, pD 7.60.

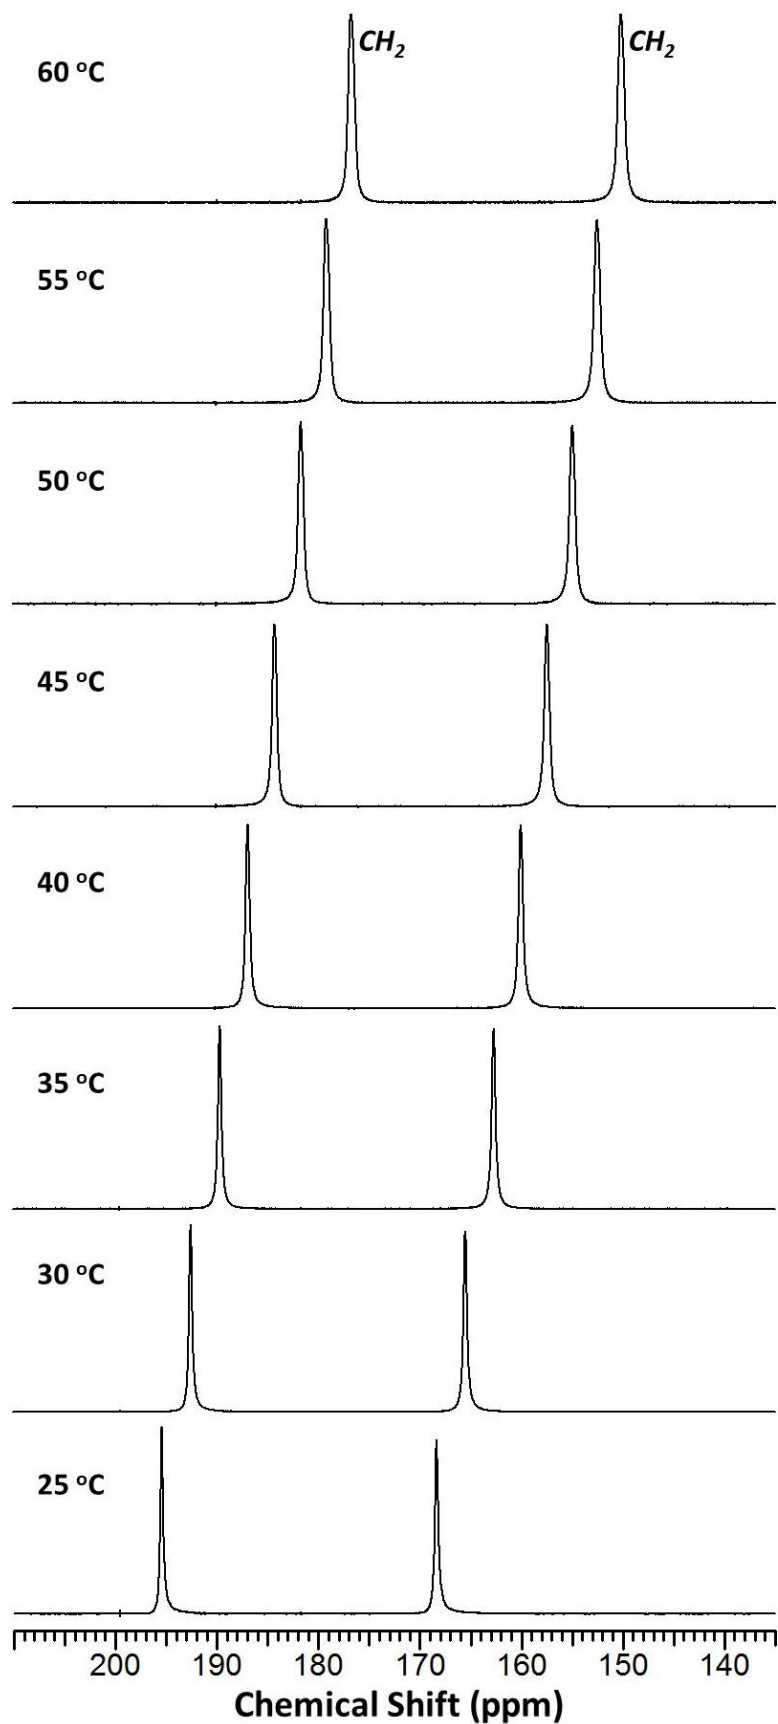

**Figure S5.** Expansion showing <sup>1</sup>H NMR resonances of two downfield highly-shifted CH<sub>2</sub> peaks of [Fe(MPT)]<sup>2+</sup> at 25 to 60 °C in 100 mM NaCl, D<sub>2</sub>O, pD 7.60.



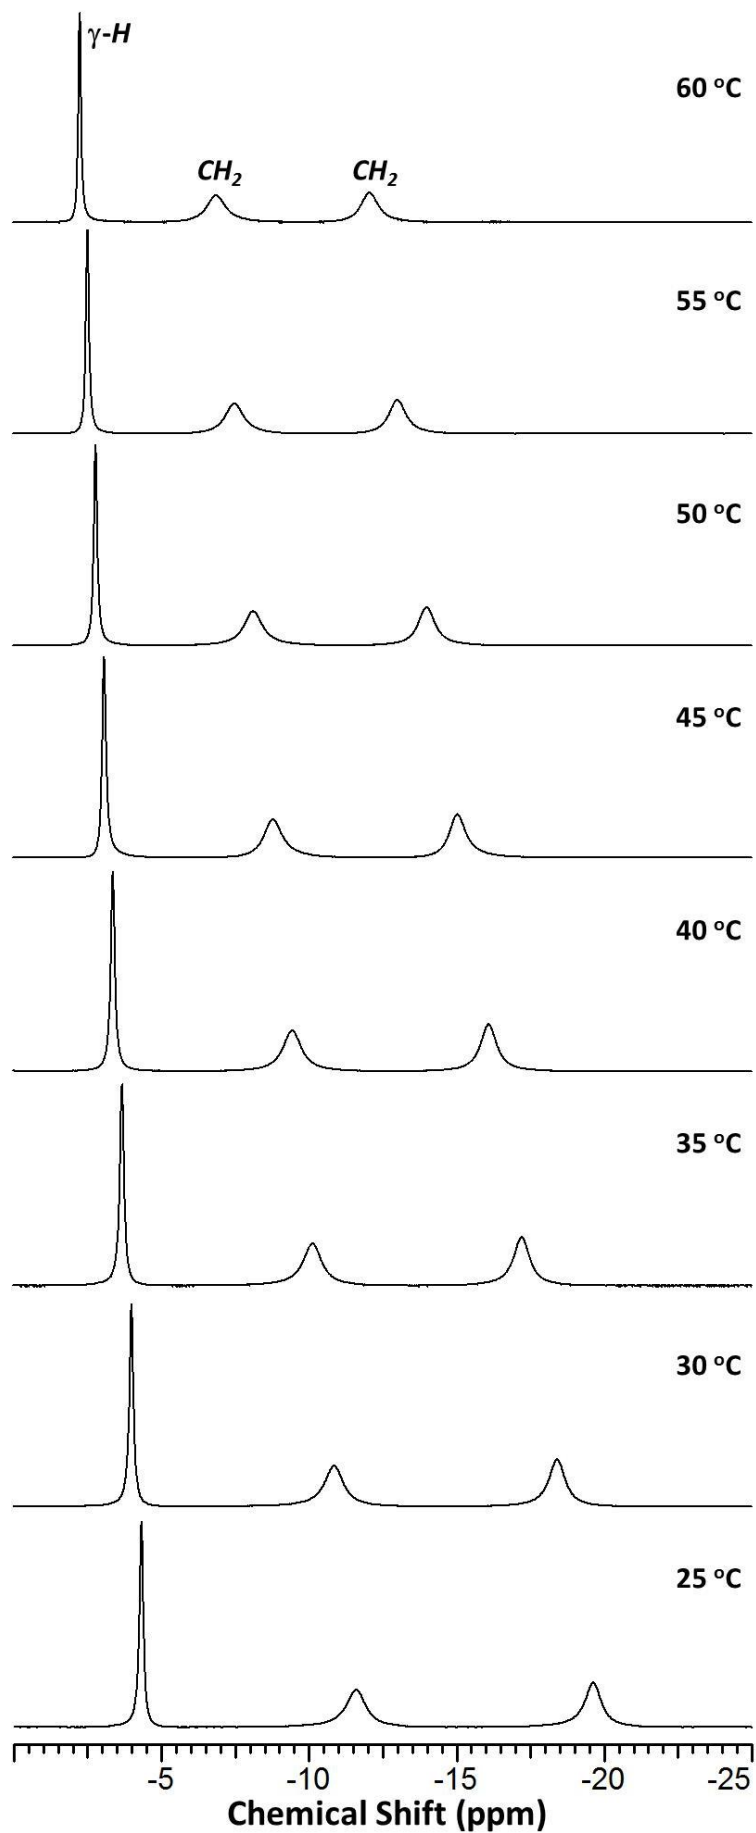

**Figure S6.** Expansion showing <sup>1</sup>H NMR resonances of some upfield shifted peaks of [Fe(MPT)]<sup>2+</sup> at 25 to 60 °C in 100 mM NaCl, D<sub>2</sub>O, pD 7.60.

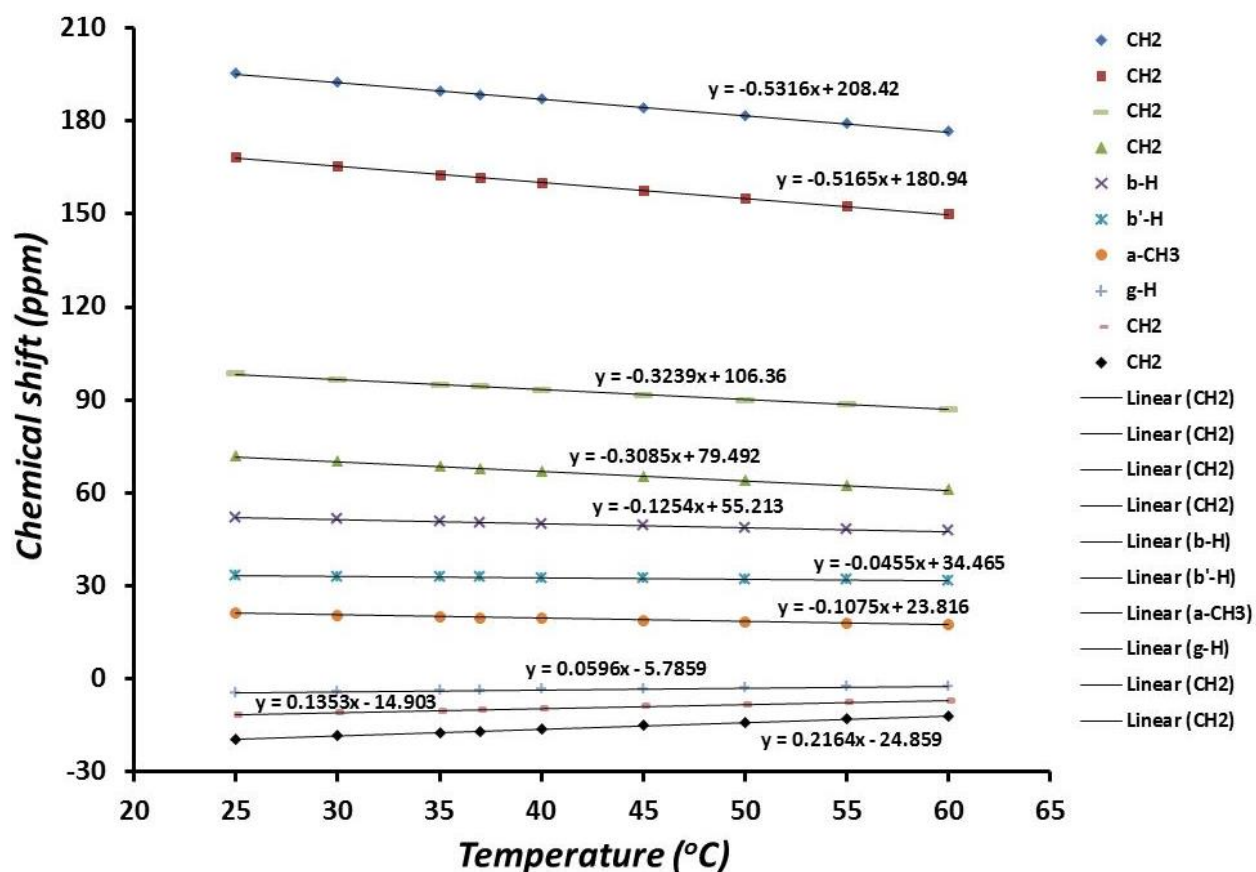

**Figure S7.** Linear fit of temperature-dependent paramagnetically-shifted  $^1\text{H}$  NMR resonances of  $[\text{Fe}(\text{MPT})]^{2+}$  in the range of 25 to 60  $^{\circ}\text{C}$ . Solutions contained 100 mM NaCl,  $\text{D}_2\text{O}$ , pD 7.60.

**Table S1.** Chemical shift and peak width of  $^1\text{H}$  NMR resonances of 36 mM  $[\text{Fe}(\text{MPT})]^{2+}$ , 100 mM NaCl,  $\text{D}_2\text{O}$ , pD 7.60 as a function of temperature.

| $T$ ( $^{\circ}\text{C}$ ) | <i>Type of <math>[\text{Fe}(\text{MPT})]^{2+}</math> protons</i> |               |               |               |                  |                   |                      |      |                   |               |               |
|----------------------------|------------------------------------------------------------------|---------------|---------------|---------------|------------------|-------------------|----------------------|------|-------------------|---------------|---------------|
|                            | $\text{CH}_2$                                                    | $\text{CH}_2$ | $\text{CH}_2$ | $\text{CH}_2$ | $\beta\text{-H}$ | $\beta'\text{-H}$ | $\alpha\text{-CH}_3$ | S    | $\gamma\text{-H}$ | $\text{CH}_2$ | $\text{CH}_2$ |
|                            | Peak width in FWHM (Hz)                                          |               |               |               |                  |                   |                      |      |                   |               |               |
| 25                         | 149                                                              | 175           | 179           | 213           | 75.1             | 70.7              | 207                  | 8.80 | 73.4              | 358           | 307           |
| 30                         | 173                                                              | 193           | 187           | 211           | 81.3             | 69.8              | 211                  | 7.64 | 78.3              | 350           | 302           |
| 35                         | 193                                                              | 209           | 196           | 211           | 86.6             | 66.1              | 217                  | 6.89 | 80.1              | 345           | 298           |
| 37                         | 207                                                              | 223           | 203           | 215           | 89.7             | 64.3              | 220                  | 7.03 | 80.1              | 344           | 300           |
| 40                         | 226                                                              | 241           | 214           | 221           | 93.8             | 61.4              | 225                  | 7.30 | 78.9              | 347           | 303           |
| 45                         | 263                                                              | 276           | 231           | 232           | 100              | 56.3              | 232                  | 7.43 | 74.5              | 348           | 309           |
| 50                         | 294                                                              | 308           | 247           | 243           | 104              | 52.3              | 237                  | 7.54 | 67.8              | 351           | 316           |
| 55                         | 326                                                              | 338           | 263           | 255           | 107              | 50.5              | 237                  | 8.21 | 60.8              | 353           | 321           |
| 60                         | 353                                                              | 362           | 277           | 263           | 108              | 50.1              | 229                  | 9.33 | 54.7              | 359           | 330           |
| $T$ ( $^{\circ}\text{C}$ ) | <i><math>^1\text{H}</math> NMR Chemical shift (ppm)</i>          |               |               |               |                  |                   |                      |      |                   |               |               |
| 25                         | 195.45                                                           | 168.36        | 98.46         | 72.09         | 52.14            | 33.33             | 21.22                | 4.67 | -4.34             | -11.63        | -19.65        |
| 30                         | 192.56                                                           | 165.53        | 96.70         | 70.31         | 51.47            | 33.10             | 20.62                | 4.67 | -4.01             | -10.87        | -18.41        |
| 35                         | 189.70                                                           | 162.75        | 94.96         | 68.59         | 50.80            | 32.87             | 20.02                | 4.67 | -3.68             | -10.11        | -17.21        |
| 37                         | 188.60                                                           | 161.68        | 94.29         | 67.94         | 50.54            | 32.78             | 19.79                | 4.67 | -3.56             | -9.85         | -16.76        |
| 40                         | 186.96                                                           | 160.08        | 93.29         | 66.96         | 50.16            | 32.65             | 19.46                | 4.67 | -3.37             | -9.44         | -16.09        |
| 45                         | 184.29                                                           | 157.50        | 91.67         | 65.43         | 49.53            | 32.41             | 18.92                | 4.67 | -3.08             | -8.77         | -15.02        |
| 50                         | 181.74                                                           | 154.99        | 90.09         | 63.96         | 48.92            | 32.19             | 18.41                | 4.67 | -2.79             | -8.10         | -13.97        |
| 55                         | 179.23                                                           | 152.60        | 88.59         | 62.58         | 48.32            | 31.96             | 17.92                | 4.67 | -2.51             | -7.49         | -12.99        |
| 60                         | 176.82                                                           | 150.25        | 87.11         | 61.26         | 47.75            | 31.74             | 17.45                | 4.67 | -2.25             | -6.87         | -12.05        |
|                            | <i>CT (ppm/<math>^{\circ}\text{C}</math>)</i>                    |               |               |               |                  |                   |                      |      |                   |               |               |
|                            | -0.53                                                            | -0.52         | -0.32         | -0.31         | -0.13            | -0.05             | -0.11                | N/A  | 0.06              | 0.14          | 0.22          |
| $T$ ( $^{\circ}\text{C}$ ) | <i> CT /FWHM (<math>1^{\circ}\text{C}</math>) *</i>              |               |               |               |                  |                   |                      |      |                   |               |               |
| 37                         | 1.28                                                             | 1.17          | 0.79          | 0.72          | 0.73             | 0.39              | 0.25                 | N/A  | 0.38              | 0.20          | 0.37          |
| $T$ ( $^{\circ}\text{C}$ ) | <i><math>T_1</math> / (St. Dev.) (ms) **</i>                     |               |               |               |                  |                   |                      |      |                   |               |               |
| 25                         | 4.4                                                              | 3.7           | 3.8           | 2.4           | 30               | 21                | 2.4                  | ND   | 63                | 1.1           | 1.2           |
|                            | (0.1)                                                            | (0.2)         | (0.1)         | (0.1)         | (1)              | (2)               | (0.1)                | ND   | (1.)              | (0.1)         | (0.2)         |

\* – Calculated for FWHM (Hz) measured at 37  $^{\circ}\text{C}$ .

\*\* – Measured at 25  $^{\circ}\text{C}$ .

S – Solvent peak.

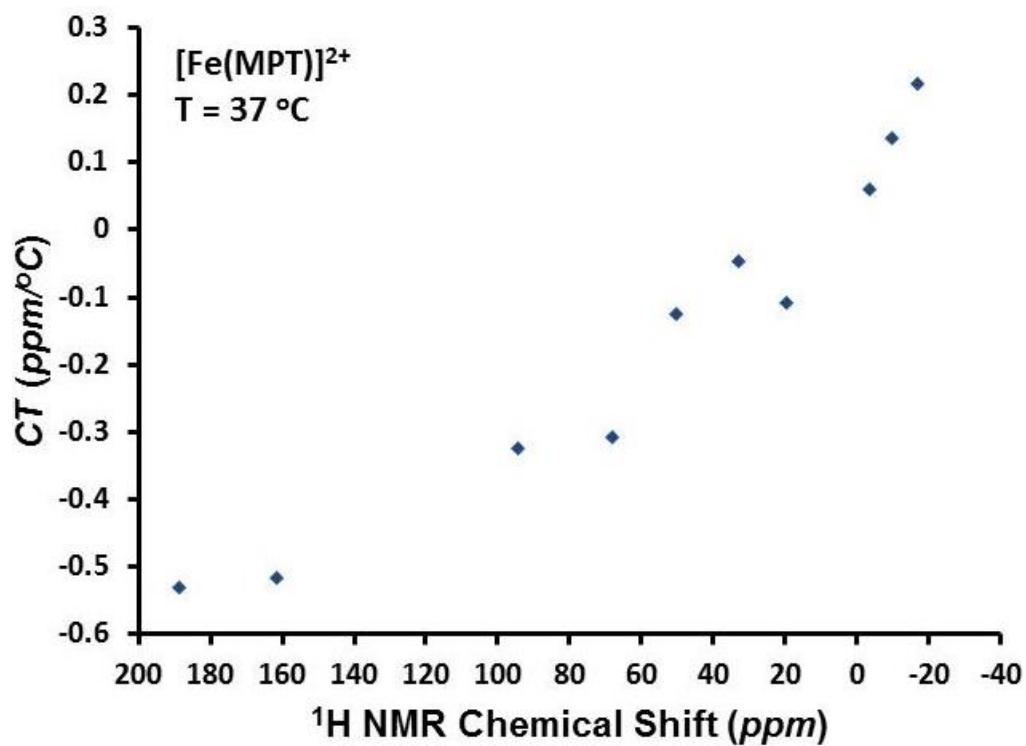

**Figure S8.** Dependence of *CT* values (ppm/°C) of <sup>1</sup>H NMR resonances on their corresponding chemical shifts (37 °C) for [Fe(MPT)]<sup>2+</sup>. <sup>1</sup>H NMR data was collected in 100 mM NaCl, D<sub>2</sub>O, pD 7.60.

# $^1\text{H}$ NMR data for $[\text{Fe}(\text{AMPT})]^{2+}$

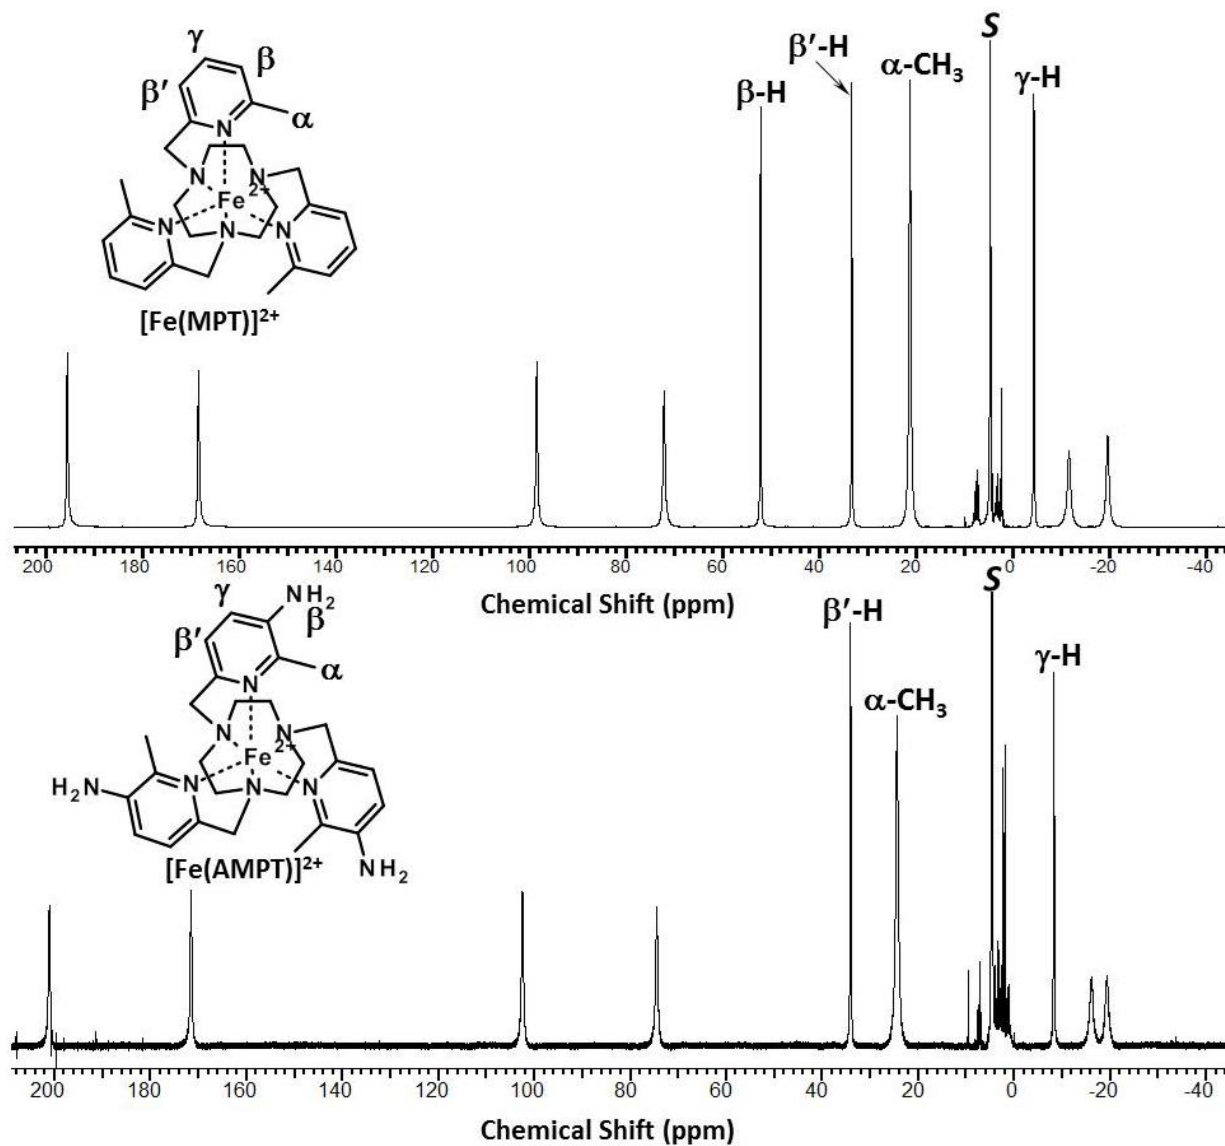

**Figure S9.** Comparison of  $^1\text{H}$  NMR spectra of  $[\text{Fe}(\text{MPT})]^{2+}$  and  $[\text{Fe}(\text{AMPT})]^{2+}$  at 25 °C in 100 mM NaCl,  $\text{D}_2\text{O}$ , pD 7.00-7.20. Aromatic protons and their  $^1\text{H}$  NMR resonances are labeled with  $\beta$ ,  $\beta'$  and  $\gamma$ ; while solvent peak is labeled with "s".

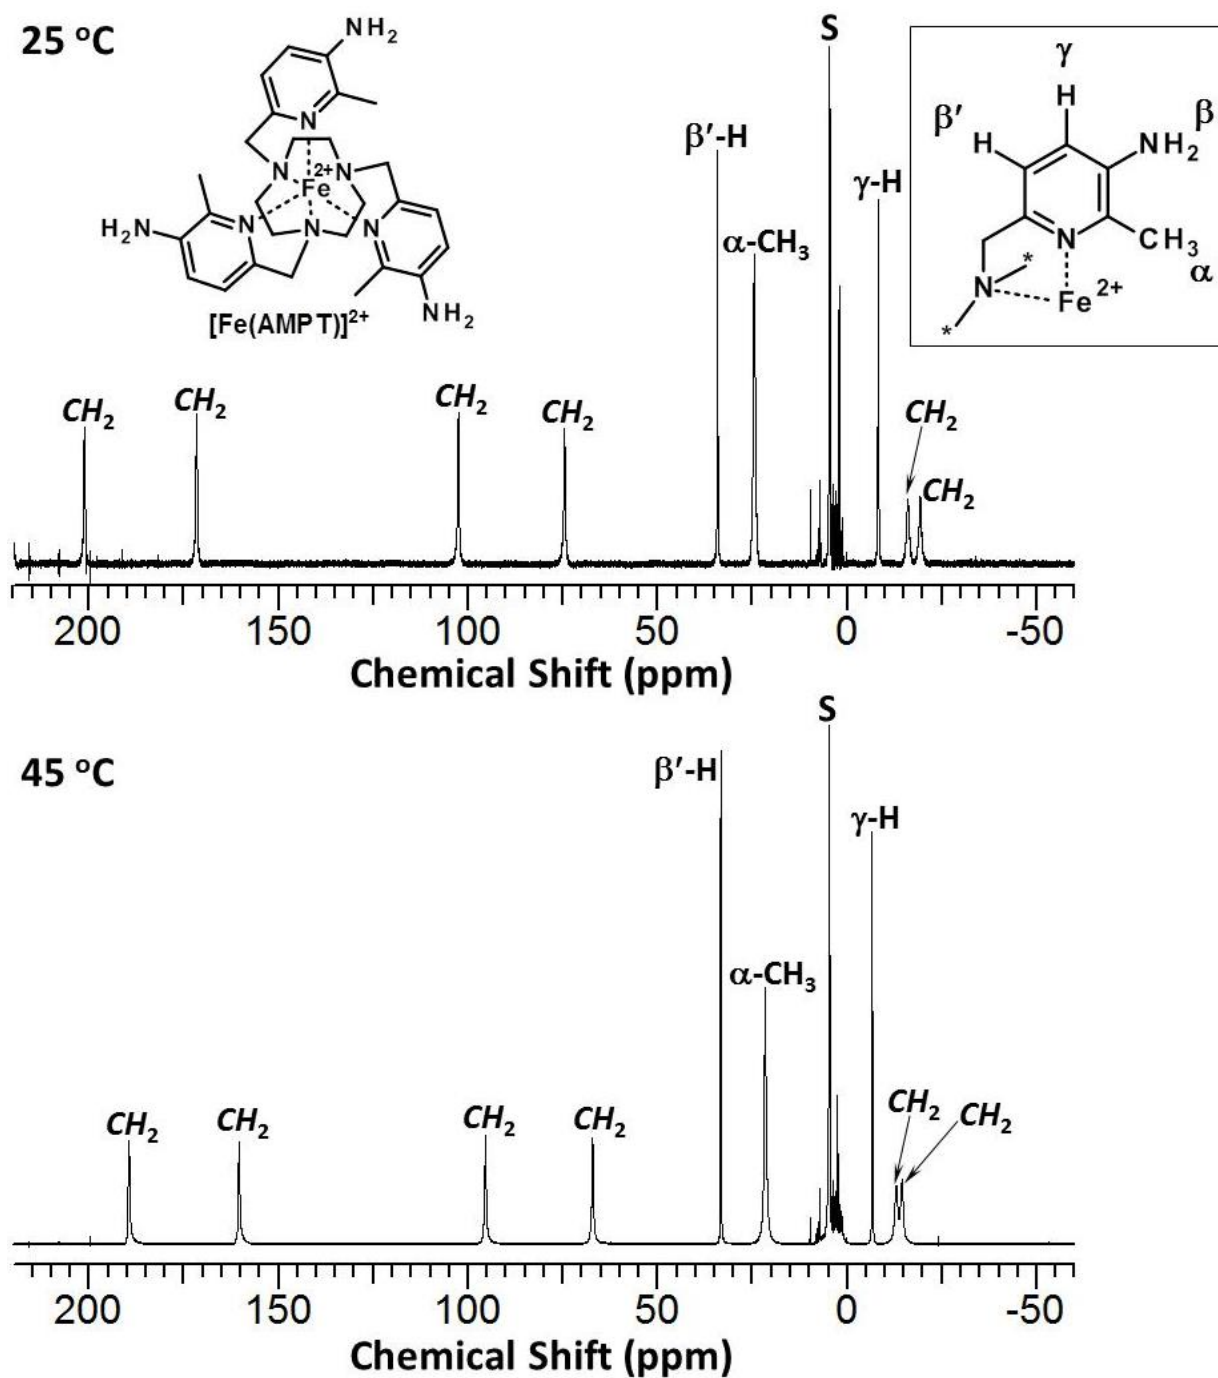

**Figure S10.**  $^1\text{H}$  NMR spectrum of  $[\text{Fe}(\text{AMPT})]^{2+}$  at 25 °C and 45 °C in 100 mM NaCl,  $\text{D}_2\text{O}$ , pH 7.00. Aromatic protons, amine, methyl and their  $^1\text{H}$  NMR resonances are labeled with  $\alpha$ ,  $\beta$ ,  $\beta'$  and  $\gamma$ ; while solvent peak is labeled with "s".

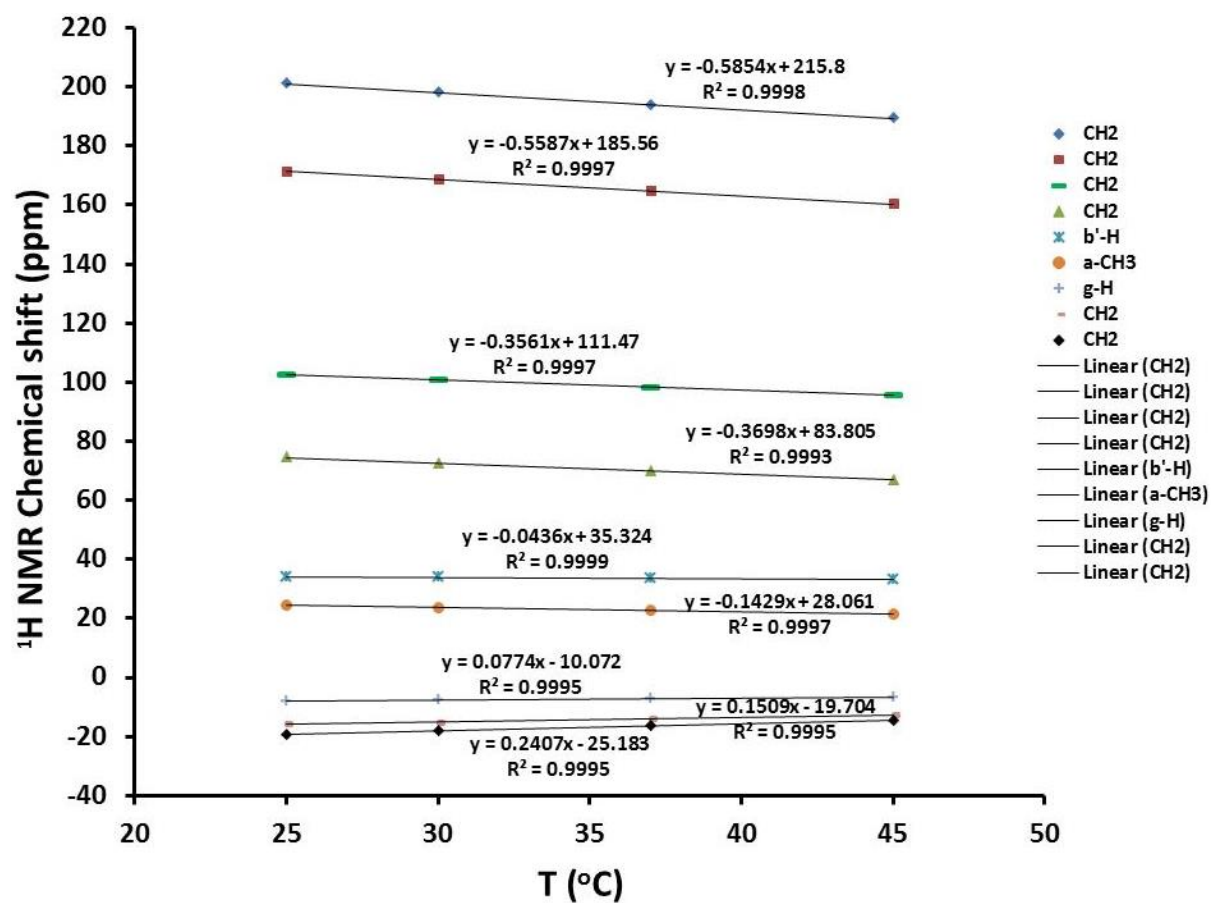

**Figure S11.** Linear fit of temperature-dependent paramagnetically-shifted  $^1\text{H}$  NMR resonances of  $[\text{Fe}(\text{AMPT})]^{2+}$  in the range of 25 to 45  $^\circ\text{C}$ . All samples contained 100 mM NaCl,  $\text{D}_2\text{O}$ , pD 7.00.

**Table S2.** Properties of temperature-dependent  $^1\text{H}$  NMR resonances of  $[\text{Fe}(\text{AMPT})]^{2+}$ , 100 mM NaCl,  $\text{D}_2\text{O}$ , pD 7.00.

| $T$ ( $^{\circ}\text{C}$ ) | <i>Type of <math>[\text{Fe}(\text{AMPT})]^{2+}</math> protons</i> |               |               |               |                   |                      |      |                   |               |               |
|----------------------------|-------------------------------------------------------------------|---------------|---------------|---------------|-------------------|----------------------|------|-------------------|---------------|---------------|
|                            | $\text{CH}_2$                                                     | $\text{CH}_2$ | $\text{CH}_2$ | $\text{CH}_2$ | $\beta\text{'-H}$ | $\alpha\text{-CH}_3$ | S    | $\gamma\text{-H}$ | $\text{CH}_2$ | $\text{CH}_2$ |
|                            | Peak width in FWHM (Hz)                                           |               |               |               |                   |                      |      |                   |               |               |
| 25                         | 190                                                               | 200           | 209           | 233           | 76.7              | 288                  | 1.81 | 83.4              | 402           | 397           |
| 30                         | 180                                                               | 202           | 209           | 224           | 70.9              | 287                  | 1.67 | 80.0              | 395           | 383           |
| 37                         | 196                                                               | 213           | 227           | 225           | 60.9              | 287                  | 1.62 | 70.9              | 406           | 373           |
| 45                         | 197                                                               | 221           | 216           | 218           | 46.7              | 279                  | 1.43 | 55.0              | 416           | 368           |
| $T$ ( $^{\circ}\text{C}$ ) | $^1\text{H}$ NMR Chemical shift (ppm)                             |               |               |               |                   |                      |      |                   |               |               |
| 25                         | 201.23                                                            | 171.67        | 102.62        | 74.64         | 34.23             | 24.51                | 4.75 | -8.15             | -15.96        | -19.21        |
| 30                         | 198.19                                                            | 168.74        | 100.75        | 72.65         | 34.02             | 23.76                | 4.75 | -7.74             | -15.16        | -17.93        |
| 37                         | 194.08                                                            | 164.82        | 98.24         | 70.04         | 33.71             | 22.75                | 4.75 | -7.19             | -14.09        | -16.23        |
| 45                         | 189.51                                                            | 160.48        | 95.49         | 67.23         | 33.36             | 21.65                | 4.75 | -6.60             | -12.94        | -14.39        |
|                            | CT (ppm/ $^{\circ}\text{C}$ )                                     |               |               |               |                   |                      |      |                   |               |               |
|                            | -0.59                                                             | -0.56         | -0.36         | -0.37         | -0.04             | -0.14                | N/A  | 0.08              | 0.15          | 0.24          |
| $T$ ( $^{\circ}\text{C}$ ) | $ \text{CT} /\text{FWHM}$ ( $1^{\circ}\text{C}$ ) *               |               |               |               |                   |                      |      |                   |               |               |
| 37                         | 1.51                                                              | 1.43          | 0.92          | 0.94          | 0.10              | 0.36                 | N/A  | 0.20              | 0.38          | 0.61          |

\* – Calculated for FWHM (Hz) measured at 37  $^{\circ}\text{C}$ .

S – Solvent peak.



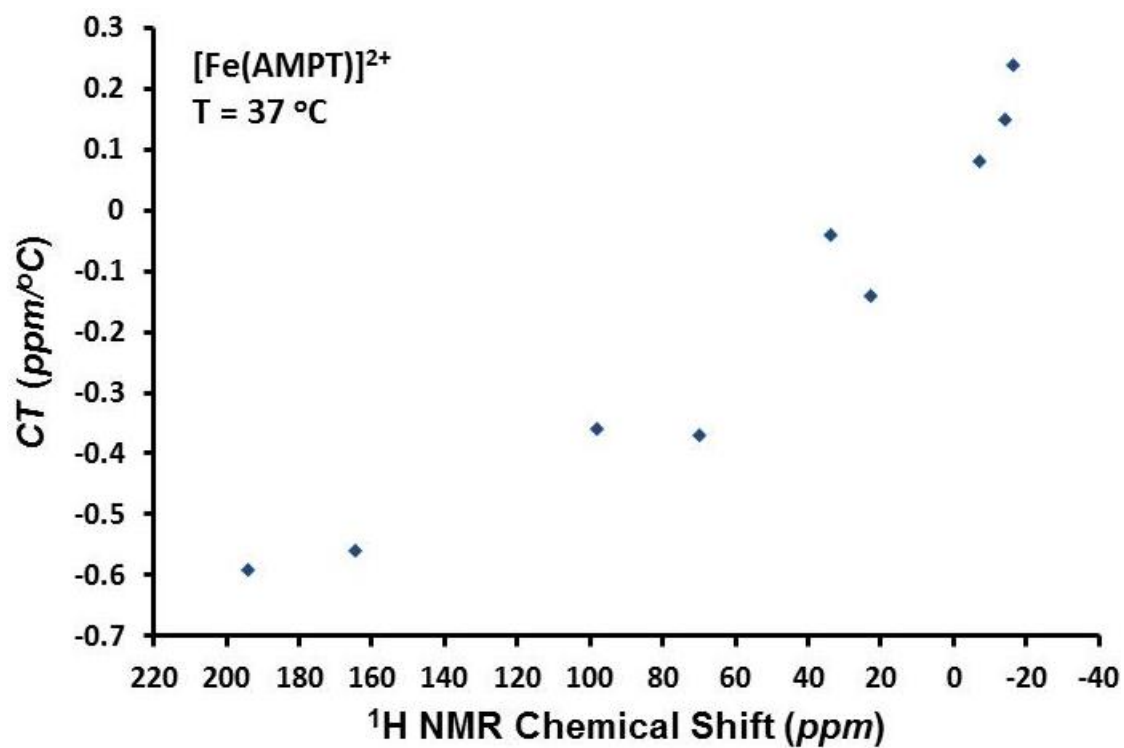

**Figure S12.** Dependence of *CT* values (ppm/°C) of <sup>1</sup>H NMR resonances on their corresponding chemical shifts (37 °C) for [Fe(AMPT)]<sup>2+</sup>. Samples contained 100 mM NaCl, D<sub>2</sub>O, pD 7.00.

# $^1\text{H}$ NMR data for $[\text{Co}(\text{MPT})]^{2+}$

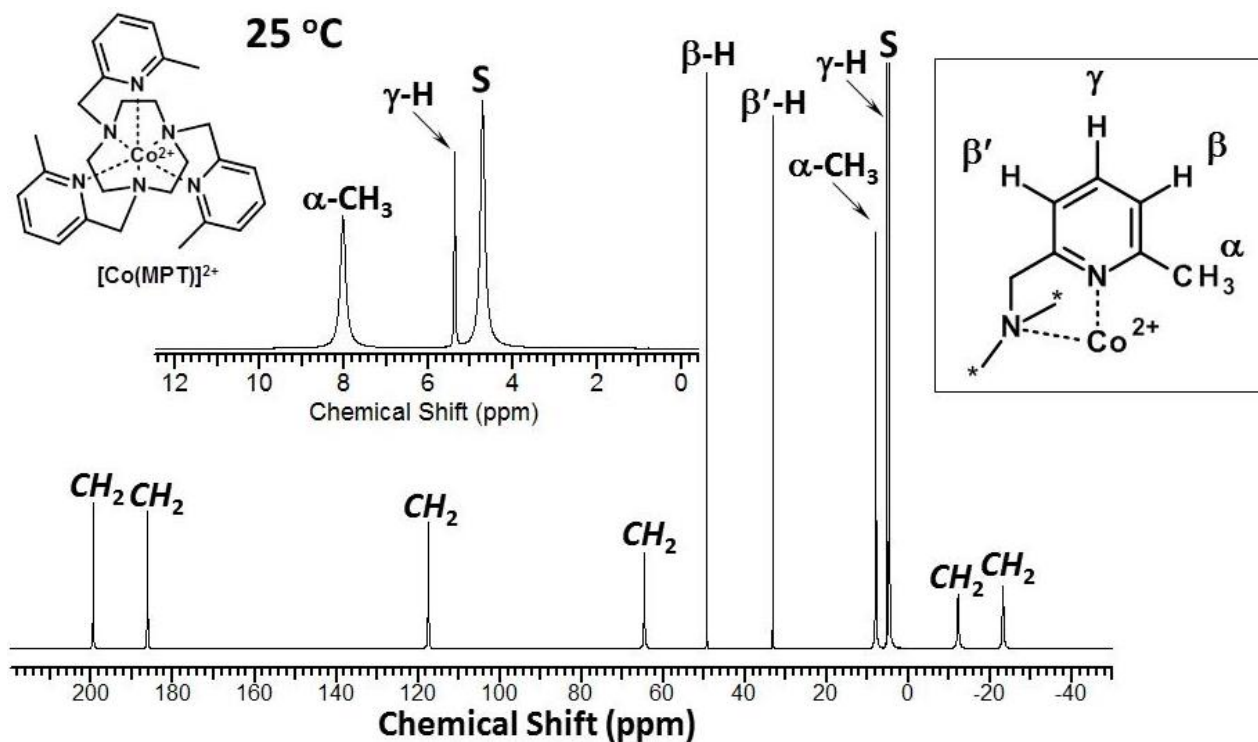

**Figure S13.**  $^1\text{H}$  NMR spectrum of 98 mM  $[\text{Co}(\text{MPT})]^{2+}$  at  $25\text{ }^\circ\text{C}$  in 100 mM NaCl,  $\text{D}_2\text{O}$ , pD 7.30. Insert shows diamagnetic region. Aromatic protons and their  $^1\text{H}$  NMR resonances are labeled with  $\beta$ ,  $\beta'$  and  $\gamma$ ; while solvent peak is labeled with "s".

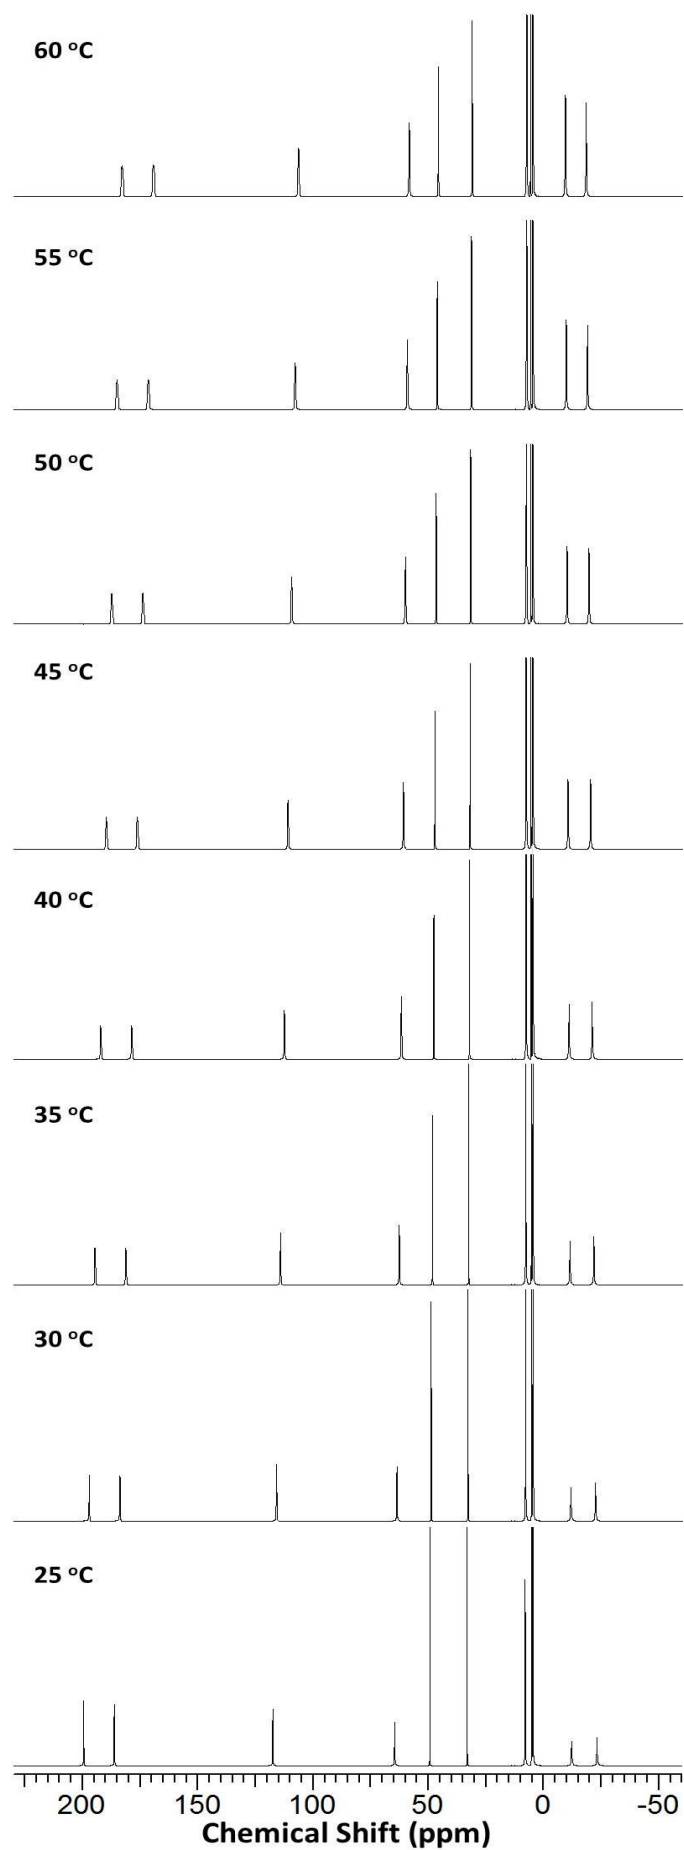

**Figure S14.** Variable temperature <sup>1</sup>H NMR spectra of [Co(MPT)]<sup>2+</sup> at 25 to 60 °C in 100 mM NaCl, D<sub>2</sub>O, pD 7.30.

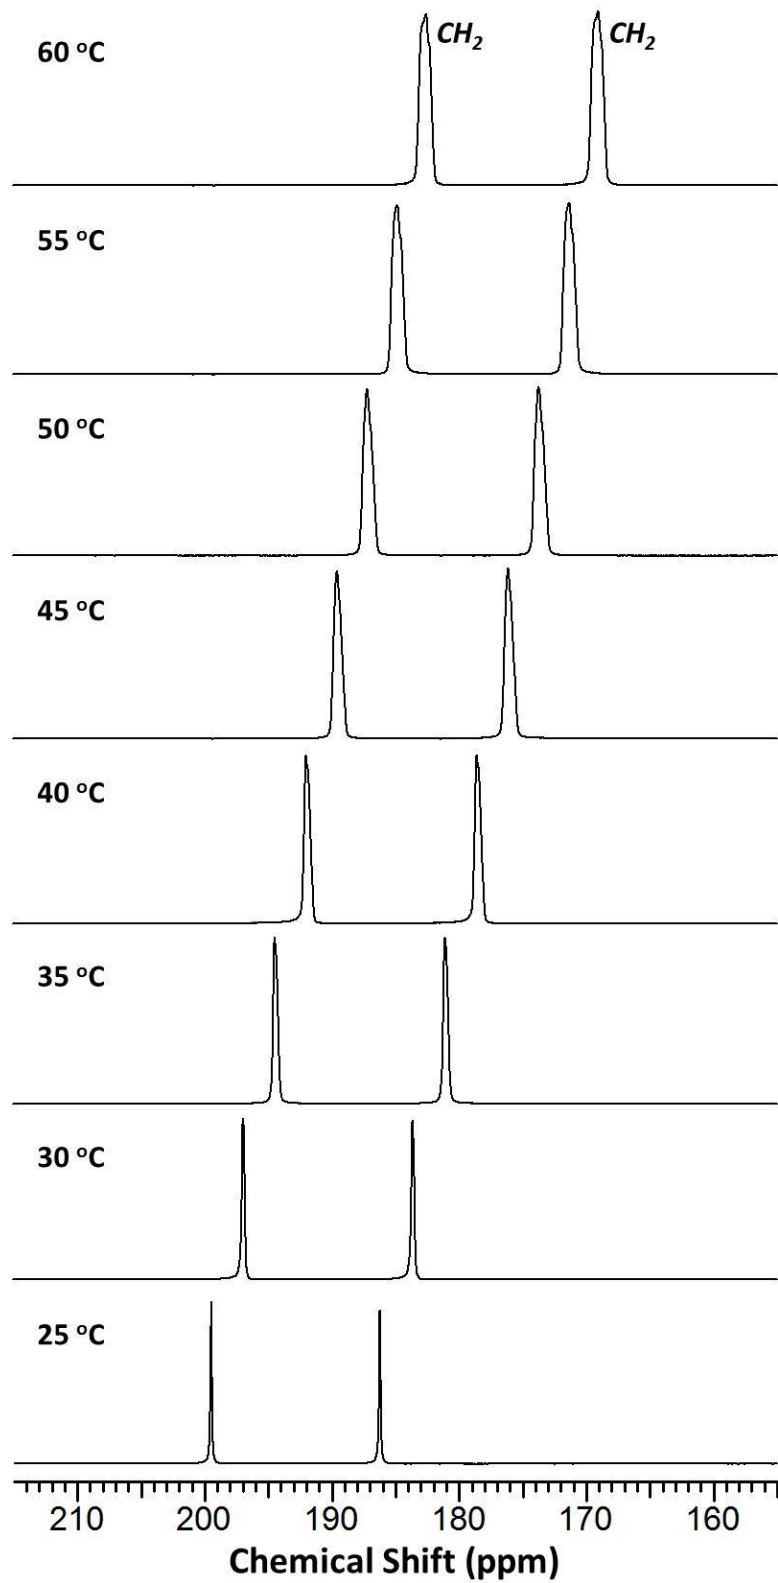

**Figure S15.** Expansion showing  $^1\text{H}$  NMR resonances of two downfield highly-shifted  $\text{CH}_2$  peaks of  $[\text{Co}(\text{MPT})]^{2+}$  at 25 to 60 °C in 100 mM NaCl,  $\text{D}_2\text{O}$ , pD 7.30.

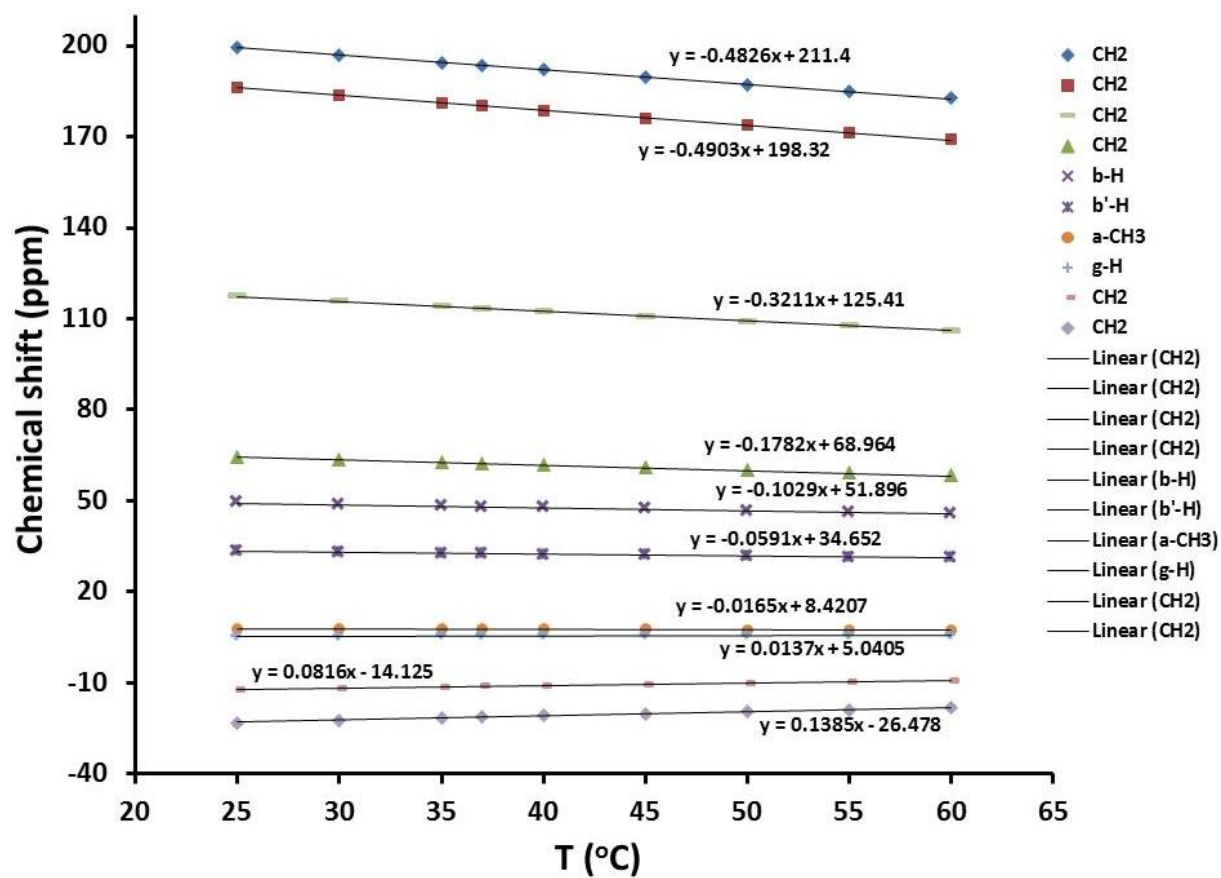

**Figure S16.** Linear fit of temperature-dependent paramagnetically-shifted  $^1\text{H}$  NMR resonances of  $[\text{Co}(\text{MPT})]^{2+}$  in the range of 25 to 60  $^\circ\text{C}$ . All samples contained 100 mM NaCl,  $\text{D}_2\text{O}$ , pD 7.30.

**Table S3.** Chemical shift and peak width of  $^1\text{H}$  NMR resonances of 98 mM  $[\text{Co}(\text{MPT})]^{2+}$ , 100 mM NaCl,  $\text{D}_2\text{O}$ , pD 7.30 as a function of temperature.

| $T$ ( $^{\circ}\text{C}$ ) | <i>Type of <math>[\text{Co}(\text{MPT})]^{2+}</math> protons</i> |               |               |               |                  |                   |                      |                   |      |               |               |
|----------------------------|------------------------------------------------------------------|---------------|---------------|---------------|------------------|-------------------|----------------------|-------------------|------|---------------|---------------|
|                            | $\text{CH}_2$                                                    | $\text{CH}_2$ | $\text{CH}_2$ | $\text{CH}_2$ | $\beta\text{-H}$ | $\beta'\text{-H}$ | $\alpha\text{-CH}_3$ | $\gamma\text{-H}$ | S    | $\text{CH}_2$ | $\text{CH}_2$ |
|                            | <i>Peak width in FWHM (Hz)</i>                                   |               |               |               |                  |                   |                      |                   |      |               |               |
| 25                         | 52.4                                                             | 58.3          | 72.1          | 98.5          | 16.5             | 17.2              | 66.5                 | 15.0              | 57.4 | 157           | 149           |
| 30                         | 62.3                                                             | 67.6          | 71.3          | 90.8          | 18.2             | 17.8              | 60.8                 | 15.6              | 42.6 | 142           | 134           |
| 35                         | 71.3                                                             | 75.9          | 71.6          | 85.7          | 19.8             | 18.2              | 56.4                 | 15.4              | 32.6 | 130           | 123           |
| 37                         | 74.2                                                             | 78.6          | 71.8          | 83.9          | 20.3             | 18.4              | 54.9                 | 15.5              | 29.2 | 126           | 119           |
| 40                         | 83.3                                                             | 87.7          | 75.5          | 82.5          | 22.2             | 19.3              | 53.0                 | 15.8              | 25.1 | 121           | 114           |
| 45                         | 102                                                              | 106           | 84.2          | 82.2          | 26.4             | 21.4              | 50.7                 | 16.4              | 20.1 | 113           | 107           |
| 50                         | 119                                                              | 123           | 93.6          | 83.1          | 30.4             | 23.7              | 49.2                 | 17.1              | 16.4 | 107           | 102           |
| 55                         | 134                                                              | 137           | 102           | 85.3          | 34.7             | 26.4              | 48.5                 | 18.2              | 13.8 | 103           | 98.8          |
| 60                         | 150                                                              | 152           | 111           | 88.2          | 38.8             | 29.1              | 48.8                 | 19.6              | 12.0 | 98.8          | 96.4          |
| $T$ ( $^{\circ}\text{C}$ ) | <i><math>^1\text{H}</math> NMR Chemical shift (ppm)</i>          |               |               |               |                  |                   |                      |                   |      |               |               |
| 25                         | 199.48                                                           | 186.23        | 117.50        | 64.63         | 49.38            | 33.21             | 8.03                 | 5.38              | 4.67 | -12.12        | -23.10        |
| 30                         | 196.96                                                           | 183.65        | 115.81        | 63.65         | 48.83            | 32.89             | 7.93                 | 5.45              | 4.67 | -11.69        | -22.35        |
| 35                         | 194.48                                                           | 181.12        | 114.14        | 62.69         | 48.29            | 32.58             | 7.84                 | 5.52              | 4.67 | -11.26        | -21.60        |
| 37                         | 193.48                                                           | 180.10        | 113.47        | 62.31         | 48.05            | 32.45             | 7.80                 | 5.55              | 4.67 | -11.09        | -21.31        |
| 40                         | 192.02                                                           | 178.61        | 112.50        | 61.75         | 47.72            | 32.26             | 7.75                 | 5.59              | 4.67 | -10.84        | -20.88        |
| 45                         | 189.60                                                           | 176.16        | 110.90        | 60.88         | 47.24            | 31.98             | 7.67                 | 5.66              | 4.67 | -10.43        | -20.19        |
| 50                         | 187.23                                                           | 173.76        | 109.32        | 60.02         | 46.73            | 31.69             | 7.59                 | 5.73              | 4.67 | -10.03        | -19.52        |
| 55                         | 184.86                                                           | 171.36        | 107.77        | 59.18         | 46.24            | 31.41             | 7.52                 | 5.79              | 4.67 | -9.64         | -18.87        |
| 60                         | 182.60                                                           | 169.07        | 106.25        | 58.38         | 45.78            | 31.14             | 7.45                 | 5.86              | 4.67 | -9.27         | -18.25        |
|                            | <i>CT (ppm/<math>^{\circ}\text{C}</math>)</i>                    |               |               |               |                  |                   |                      |                   |      |               |               |
|                            | -0.48                                                            | -0.49         | -0.32         | -0.18         | -0.1             | -0.06             | -0.017               | 0.014             | N/A  | 0.08          | 0.14          |
| $T$ ( $^{\circ}\text{C}$ ) | <i> CT /FWHM (<math>1^{\circ}\text{C}</math>) *</i>              |               |               |               |                  |                   |                      |                   |      |               |               |
| 37                         | 3.24                                                             | 3.12          | 2.23          | 1.07          | 2.46             | 1.63              | 0.16                 | 0.45              | N/A  | 0.32          | 0.59          |
| $T$ ( $^{\circ}\text{C}$ ) | <i><math>T_1</math> / (St. Dev.) (ms) **</i>                     |               |               |               |                  |                   |                      |                   |      |               |               |
| 25                         | 8.3                                                              | 7.3           | 7.0           | 4.6           | 50               | 38                | 5.7                  | 102               | ND   | 2.2           | 2.3           |
|                            | (0.2)                                                            | (0.2)         | (0.1)         | (0.1)         | (1)              | (1)               | (0.1)                | (3)               | ND   | (0.1)         | (0.1)         |

\* – Calculated for FWHM (Hz) measured at 37  $^{\circ}\text{C}$ .

\*\* – Measured at 25  $^{\circ}\text{C}$ .

S – Solvent peak.

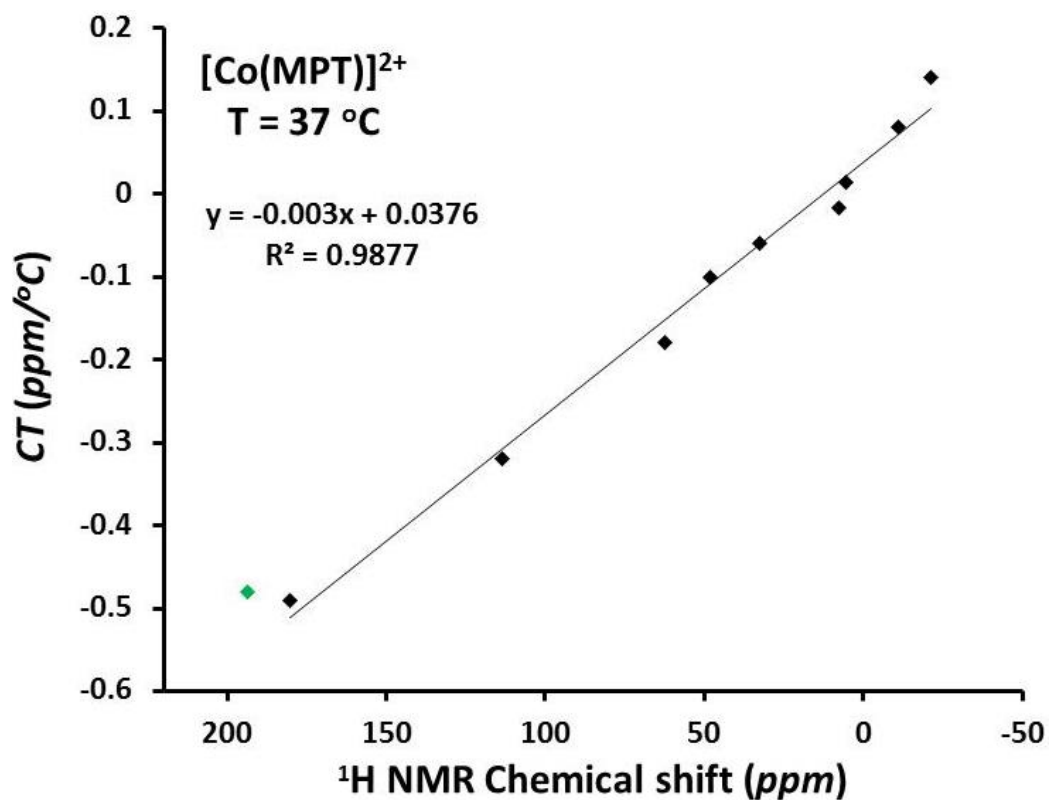

**Figure S17.** Dependence of CT values (ppm/ $^{\circ}\text{C}$ ) of  $^1\text{H}$  NMR resonances on their corresponding chemical shifts at 37  $^{\circ}\text{C}$  for  $[\text{Co}(\text{MPT})]^{2+}$ . The proton resonance at  $\delta = 193.48$  ppm at 37  $^{\circ}\text{C}$  (green diamond) was omitted from the fitting process. Best-fit slope and intercept are  $-0.003\text{ }^{\circ}\text{C}^{-1}$  and  $0.0376\text{ ppm}/^{\circ}\text{C}$ , respectively. Samples contained 100 mM NaCl,  $\text{D}_2\text{O}$ , pD 7.30.

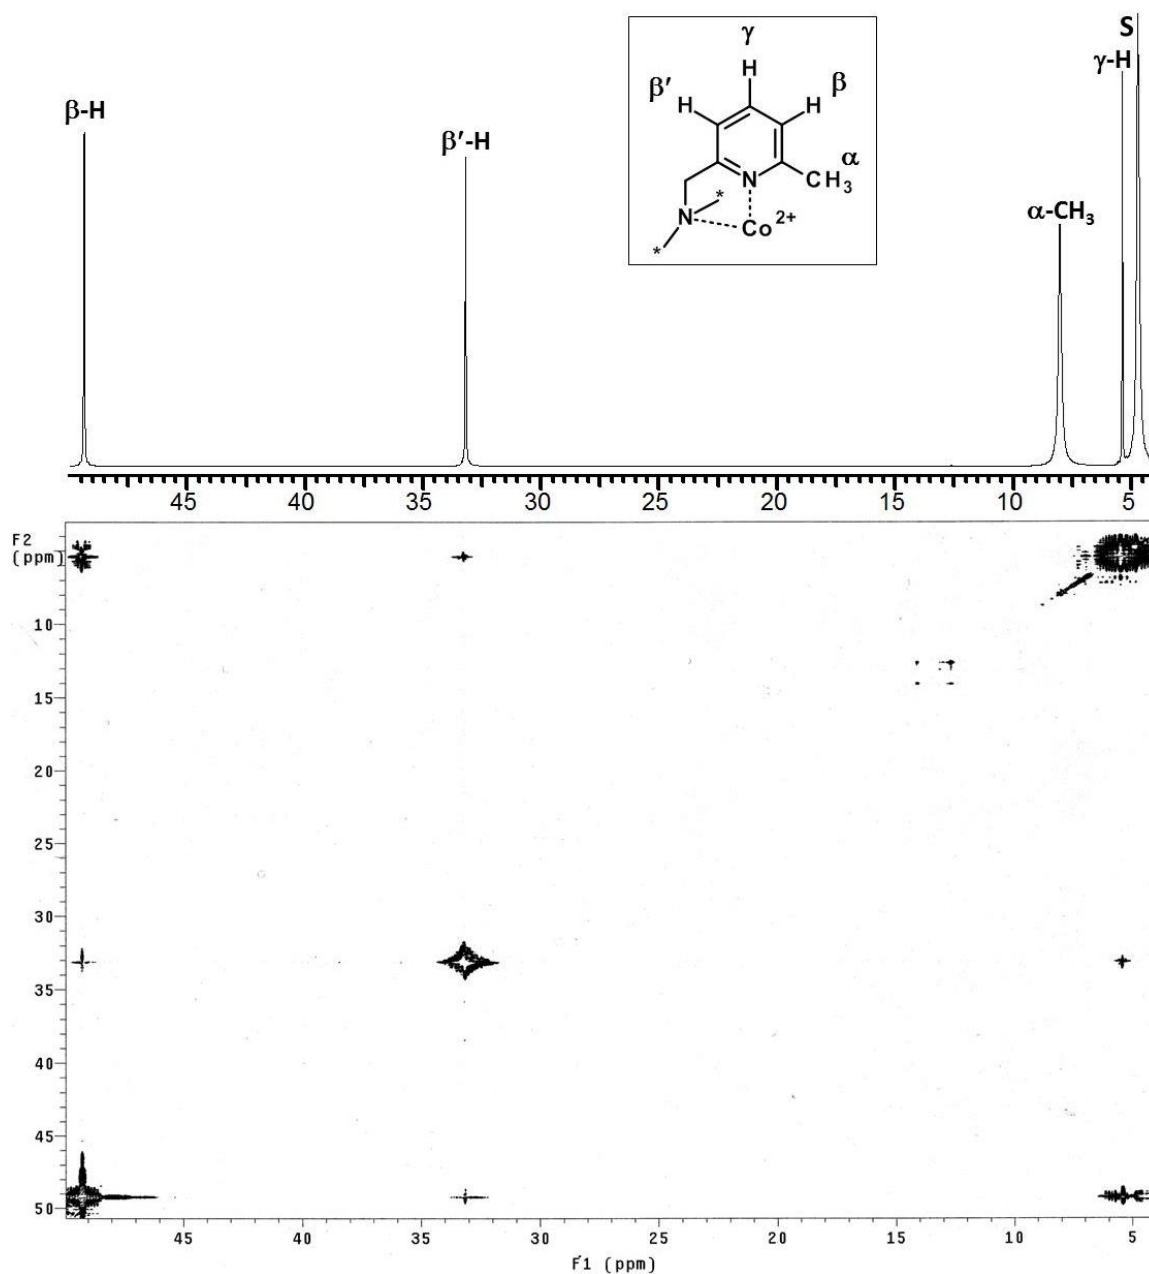

**Figure S18.** Two-dimensional <sup>1</sup>H-zTOCSY NMR spectrum (25 °C) obtained at 252 scans of 120 mM [Co(MPT)]Cl<sub>2</sub> in D<sub>2</sub>O (pD 7.0) showing the cross-peaks that allowed the identification of the proton resonances produced by aromatic protons of 6-methyl-2-picolyl pendants.



$^1\text{H}$  NMR data for  $[\text{Fe}(\text{PT})]^{2+}$

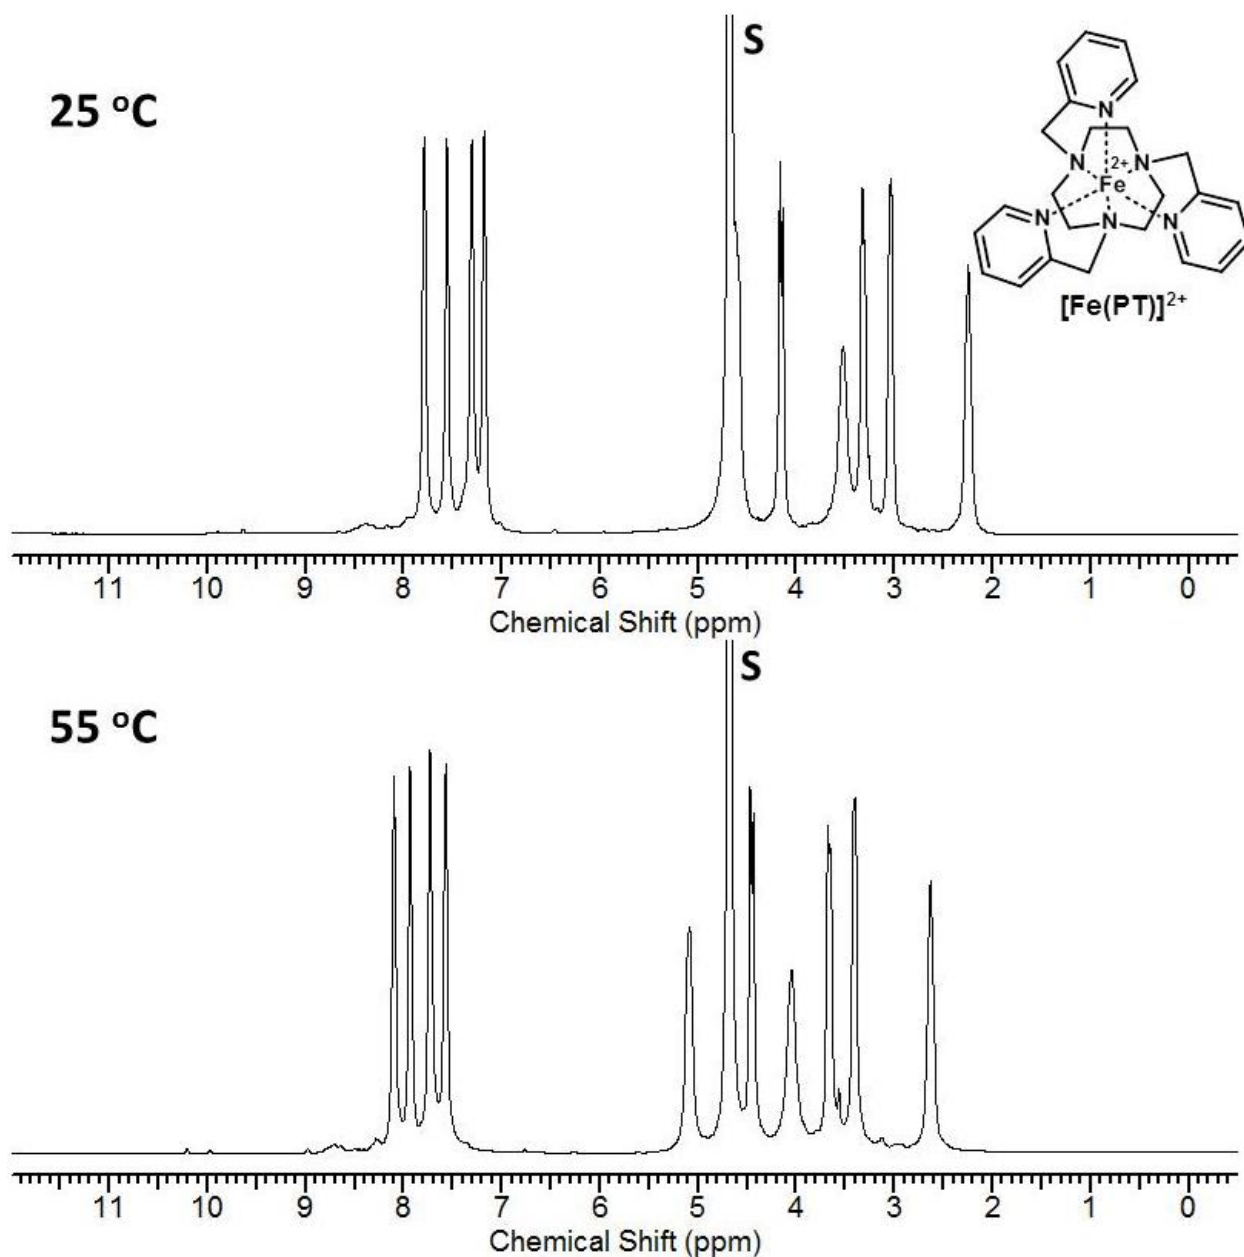

**Figure S19.**  $^1\text{H}$  NMR spectra of  $[\text{Fe}(\text{PT})]^{2+}$  at 25 °C and 55 °C in  $\text{D}_2\text{O}$ , pD 6.70. Solvent peak is labeled with "s".

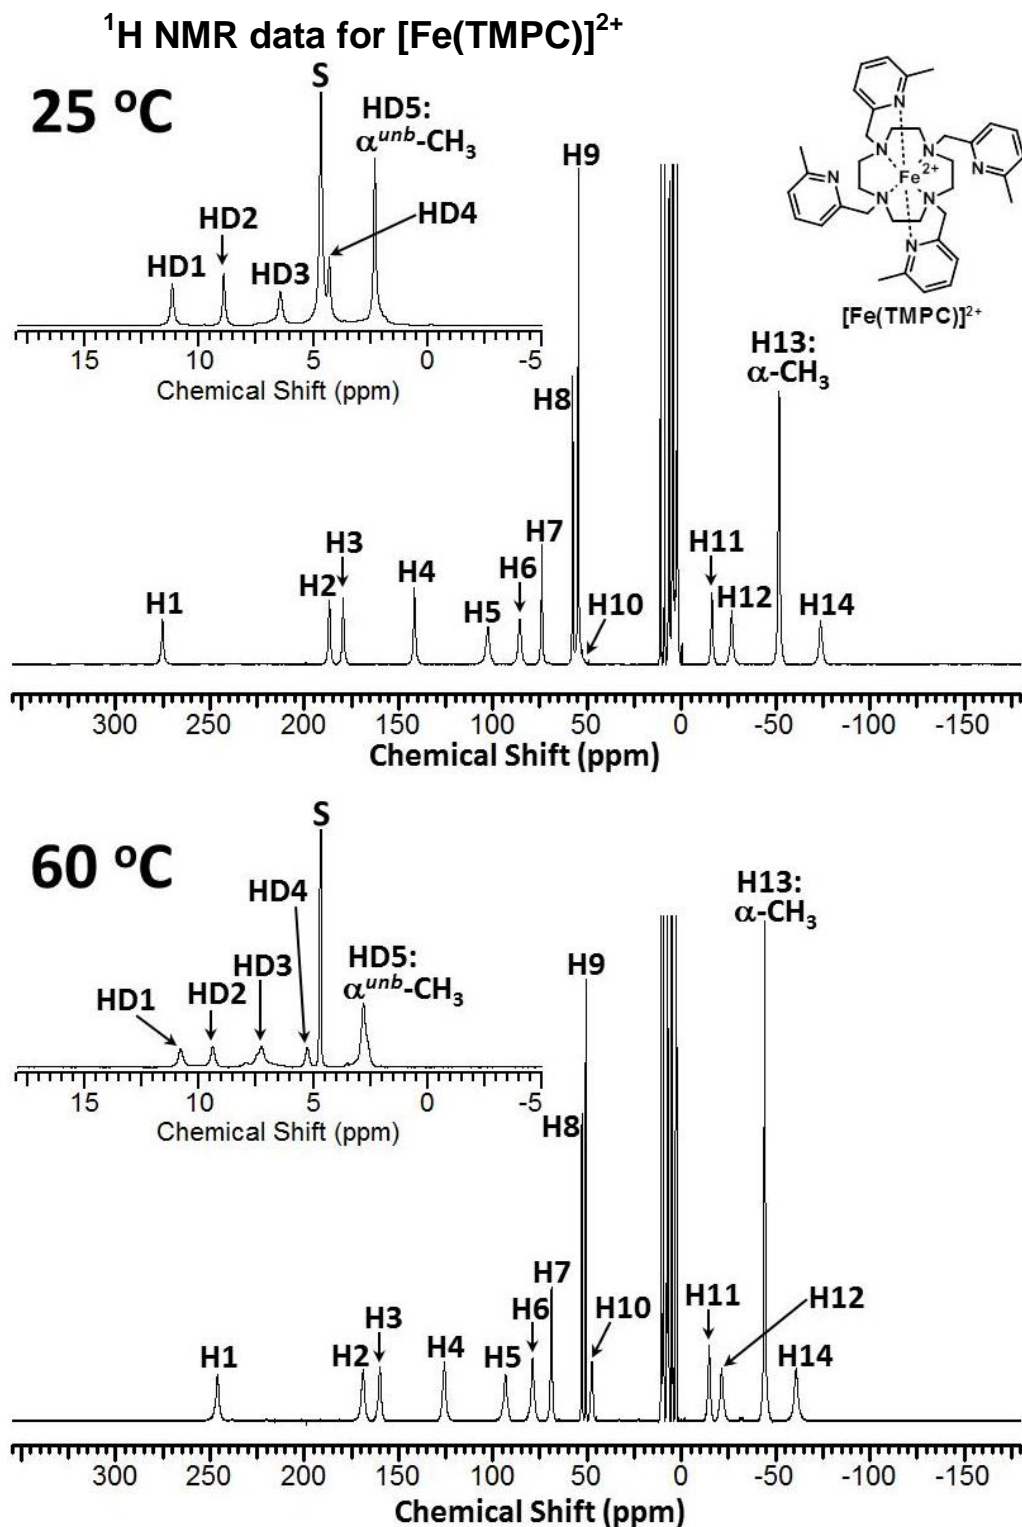

**Figure S20.**  $^1\text{H}$  NMR spectra of  $[\text{Fe}(\text{TMPC})]^{2+}$  at 25 °C and 60 °C in 100 mM NaCl,  $\text{D}_2\text{O}$ , pD 7.40. Proton resonances that display significant paramagnetic shifts are labeled **H1-H14**, while proton resonances that are not shifted from diamagnetic region are labeled **HD1-HD5**. Inserts show diamagnetic regions with solvent peaks labeled with “S”.

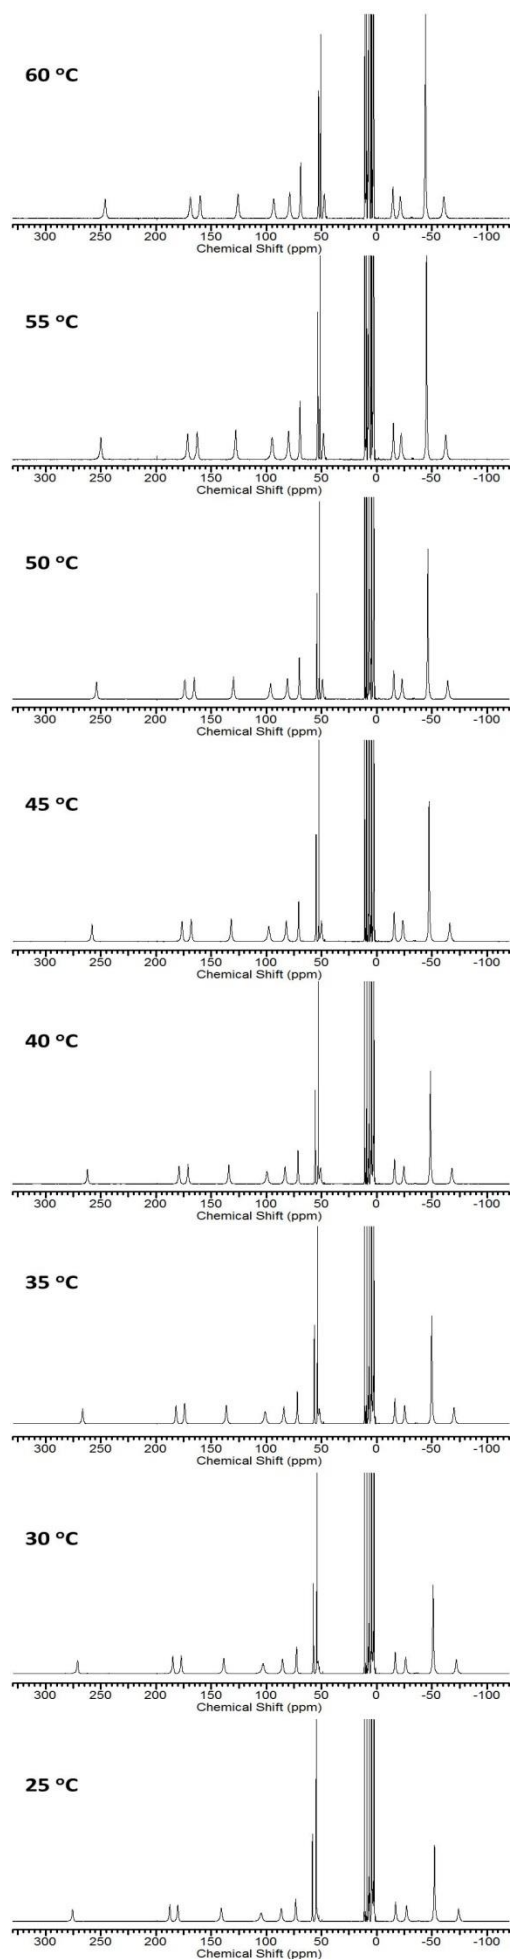

**Figure S21.** Variable temperature  $^1\text{H}$  NMR spectra of  $[\text{Fe}(\text{TMPC})]^{2+}$  at 25 to 60 °C in 100 mM NaCl,  $\text{D}_2\text{O}$ , pD 7.40.

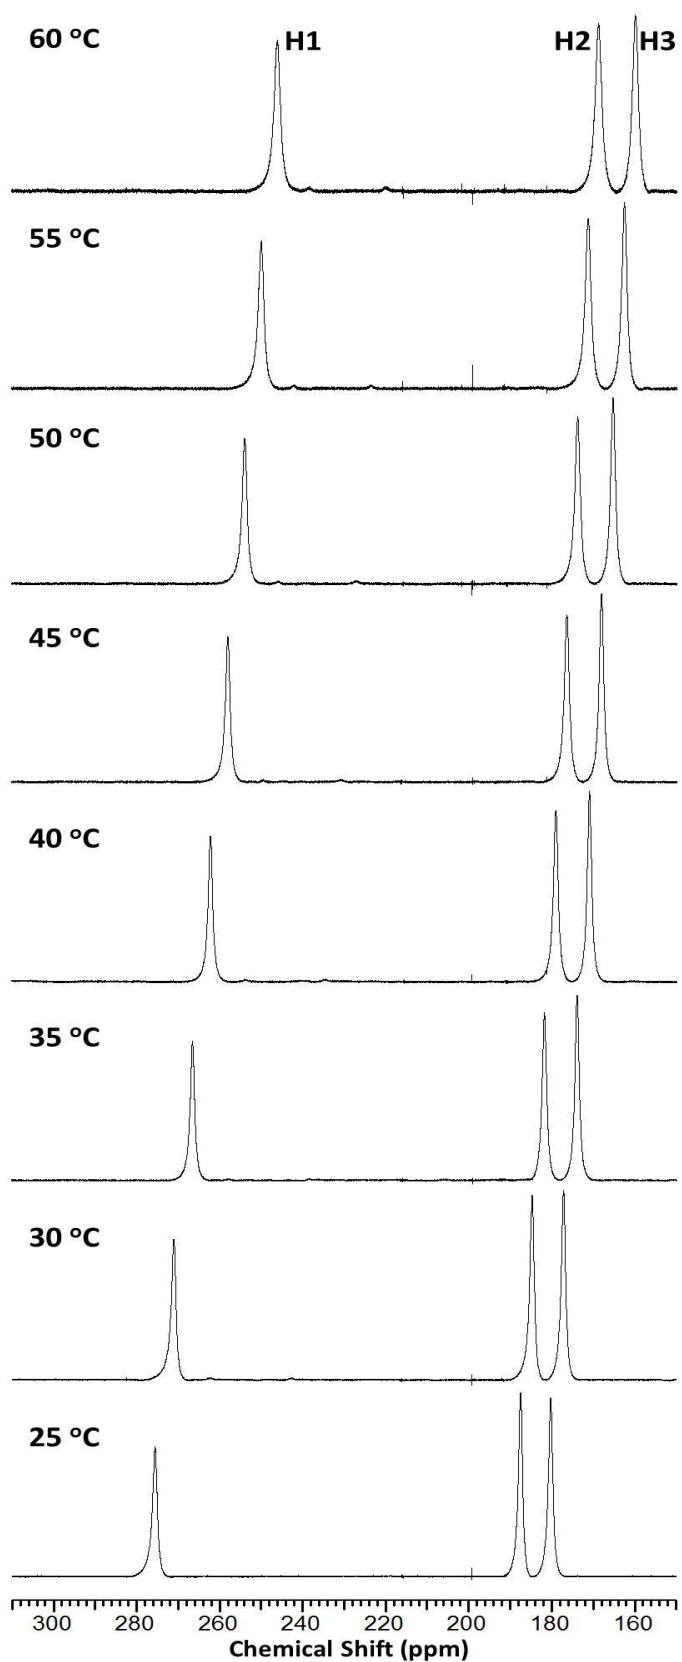

**Figure S22.** Expansion showing  $^1\text{H}$  NMR resonances of some downfield highly-shifted peaks of  $[\text{Fe}(\text{TMPC})]^{2+}$  at 25 to 60 °C in 100 mM NaCl,  $\text{D}_2\text{O}$ , pD 7.40.

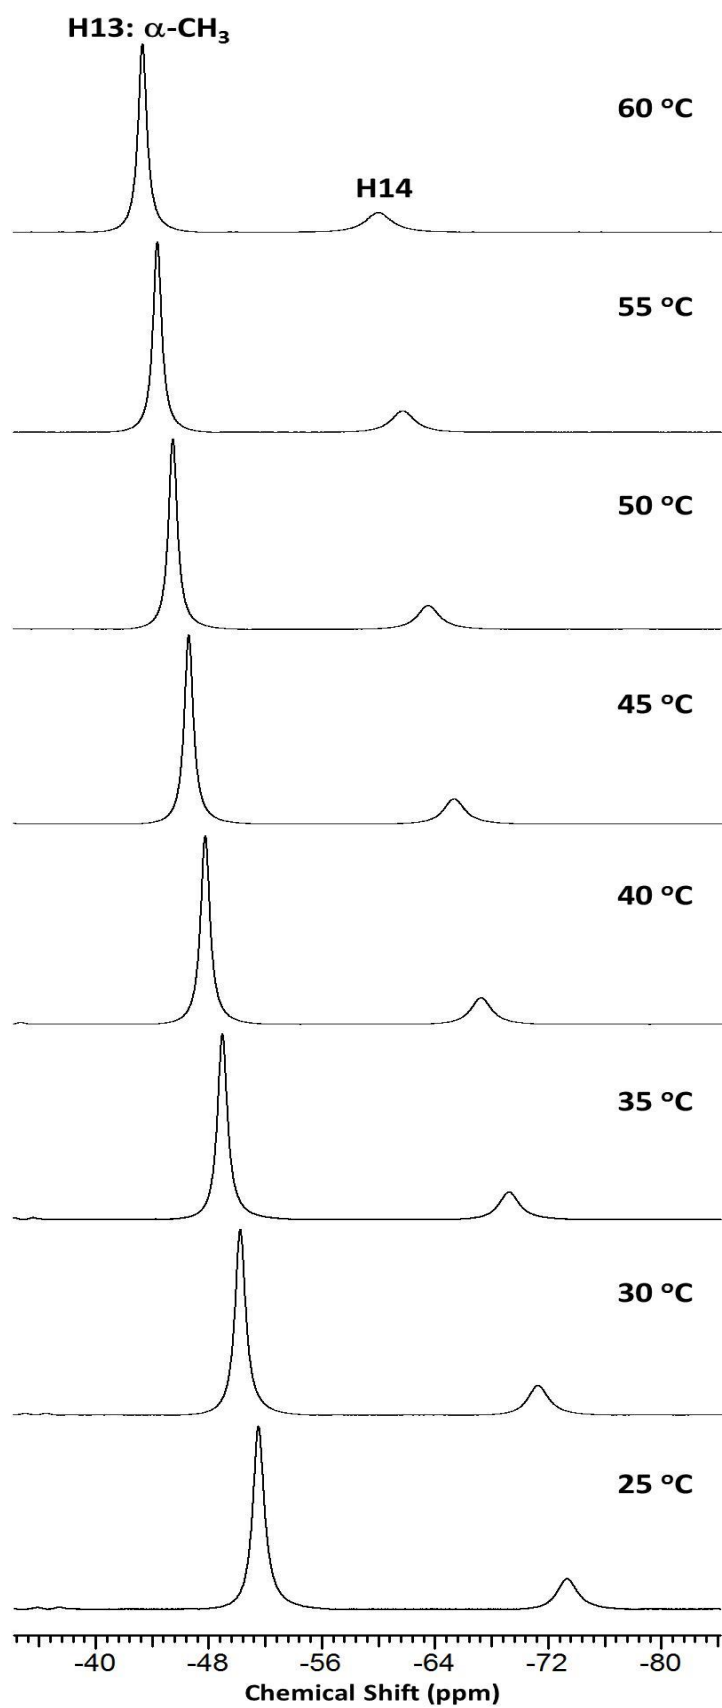

**Figure S23.** Expansion showing  $^1\text{H}$  NMR resonances of some highly-shifted peaks, including proton resonances of  $\alpha\text{-CH}_3$  groups, of  $[\text{Fe}(\text{TMPC})]^{2+}$  at 25 to 60 °C in 100 mM NaCl,  $\text{D}_2\text{O}$ , pD 7.40.

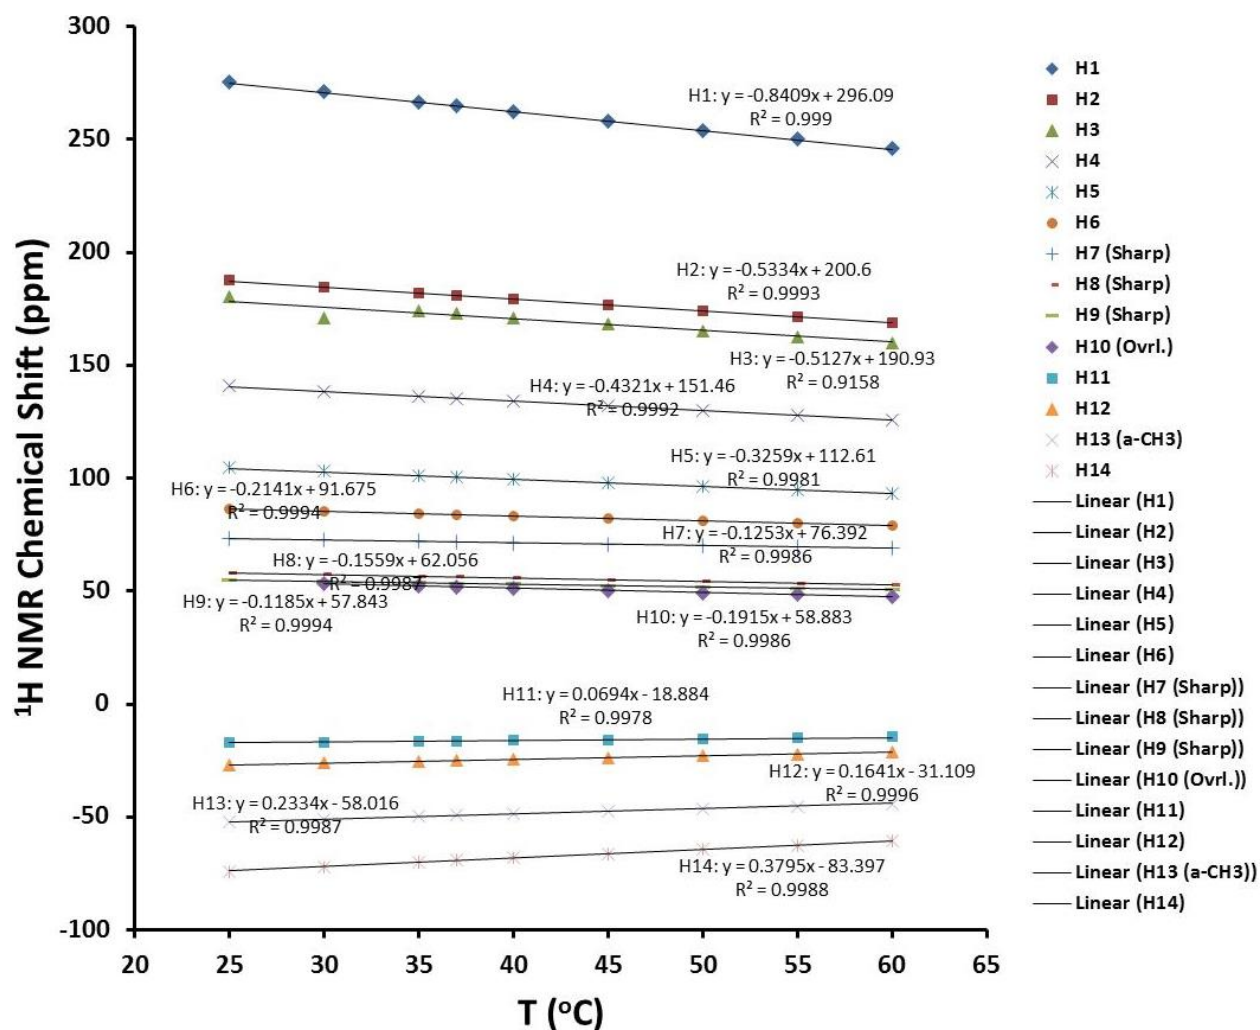

**Figure S24.** Linear fit of temperature-dependent paramagnetically-shifted  $^1\text{H}$  NMR resonances of  $[\text{Fe}(\text{TMPC})]^{2+}$  in the range of 25 to 60  $^{\circ}\text{C}$ . Samples contained 100 mM NaCl,  $\text{D}_2\text{O}$ , pD 7.40.

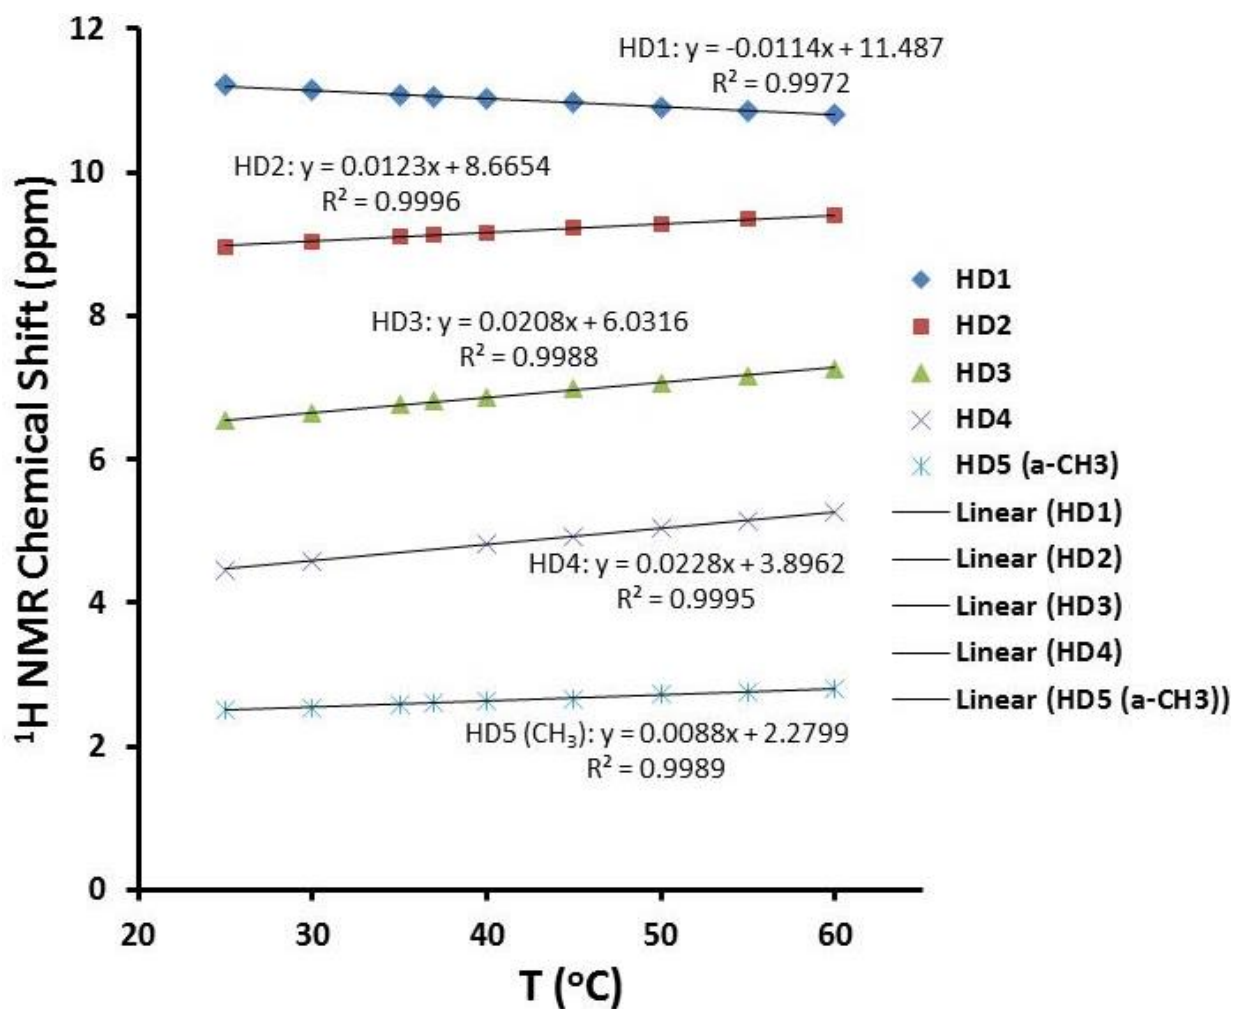

**Figure S25.** Linear fit of temperature-dependent  $^1\text{H}$  NMR resonances in diamagnetic region of  $[\text{Fe}(\text{TMPC})]^{2+}$  spectra in the range of 25 to 60  $^{\circ}\text{C}$ . Sample contained 100 mM NaCl,  $\text{D}_2\text{O}$ , pD 7.40.

**Table S4.** Chemical shift and peak width of  $^1\text{H}$  NMR resonances of  $[\text{Fe}(\text{TMPC})]^{2+}$ , 100 mM NaCl,  $\text{D}_2\text{O}$ , pD 7.40, as a function of temperature.

|               | <b>Labeled protons of <math>[\text{Fe}(\text{TMPC})]^{2+}</math></b> |           |           |           |           |           |           |           |           |               |                           |            |            |          |               |                                     |            |            |                                     |            |
|---------------|----------------------------------------------------------------------|-----------|-----------|-----------|-----------|-----------|-----------|-----------|-----------|---------------|---------------------------|------------|------------|----------|---------------|-------------------------------------|------------|------------|-------------------------------------|------------|
|               | <i>H1</i>                                                            | <i>H2</i> | <i>H3</i> | <i>H4</i> | <i>H5</i> | <i>H6</i> | <i>H7</i> | <i>H8</i> | <i>H9</i> | <i>H10*</i>   | <b>Diamagnetic Region</b> |            |            |          |               |                                     | <i>H11</i> | <i>H12</i> | <i>H13:</i><br>$\alpha\text{-CH}_3$ | <i>H14</i> |
|               |                                                                      |           |           |           |           |           |           |           |           |               | <i>HD1</i>                | <i>HD2</i> | <i>HD3</i> | <i>S</i> | <i>HD4</i>    | <i>HD5:</i><br>$\alpha\text{-CH}_3$ |            |            |                                     |            |
| <b>T (°C)</b> | <b>Peak width in FWHM (Hz)</b>                                       |           |           |           |           |           |           |           |           |               |                           |            |            |          |               |                                     |            |            |                                     |            |
| <b>25</b>     | 576                                                                  | 514       | 572       | 682       | 1290      | 610       | 393       | 137       | 64.4      | <i>Ovrlp.</i> | 33.1                      | 21.1       | 50.0       | 14.6     | 19.7          | 22.4                                | 386        | 636        | 458                                 | 617        |
| <b>30</b>     | 516                                                                  | 545       | 567       | 639       | 1090      | 561       | 360       | 143       | 67.0      | <i>Ovrlp.</i> | 33.4                      | 22.2       | 48.4       | 13.8     | N/A           | 24.1                                | 358        | 596        | 425                                 | 578        |
| <b>35</b>     | 509                                                                  | 578       | 573       | 624       | 1030      | 551       | 347       | 149       | 69.7      | 1450          | 37.1                      | 26.1       | 51.3       | 16.6     | N/A           | 28.5                                | 356        | 593        | 399                                 | 588        |
| <b>37</b>     | 501                                                                  | 585       | 568       | 598       | 971       | 531       | 340       | 152       | 71.3      | 951           | 38.5                      | 27.5       | 52.3       | 15.4     | N/A           | 29.8                                | 348        | 580        | 389                                 | 579        |
| <b>40</b>     | 507                                                                  | 610       | 575       | 587       | 941       | 528       | 336       | 156       | 75.2      | 802           | 41.0                      | 30.4       | 54.6       | 15.7     | N/A           | 32.7                                | 346        | 571        | 378                                 | 580        |
| <b>45</b>     | 558                                                                  | 679       | 627       | 621       | 955       | 556       | 346       | 167       | 85.0      | 752           | 47.5                      | 37.1       | 61.1       | 16.8     | 37.6          | 40.9                                | 360        | 590        | 369                                 | 633        |
| <b>50</b>     | 581                                                                  | 700       | 629       | 641       | 863       | 533       | 341       | 175       | 99.1      | 728           | 59.5                      | 49.2       | 75.3       | 20.3     | 50.2          | 54.1                                | 347        | 552        | 358                                 | 621        |
| <b>55</b>     | 670                                                                  | 770       | 674       | 719       | 840       | 545       | 350       | 176       | 120       | 861           | 84.4                      | 73.8       | 107        | 44.0     | 72.5          | 80.2                                | 350        | 554        | 350                                 | 661        |
| <b>60</b>     | 766                                                                  | 840       | 745       | 804       | 829       | 550       | 355       | 195       | 145       | 799           | 104                       | 93.6       | 141        | 47.3     | 92.1          | 124                                 | 335        | 525        | 357                                 | 703        |
| <b>T (°C)</b> | <b><math>^1\text{H}</math> NMR Chemical shift (ppm)</b>              |           |           |           |           |           |           |           |           |               |                           |            |            |          |               |                                     |            |            |                                     |            |
| <b>25</b>     | 275.55                                                               | 187.51    | 180.22    | 140.87    | 104.68    | 86.42     | 73.34     | 58.26     | 54.93     | <i>Ovrlp.</i> | 11.21                     | 8.97       | 6.54       | 4.68     | 4.46          | 2.50                                | -17.11     | -27.06     | -52.34                              | -74.14     |
| <b>30</b>     | 271.04                                                               | 184.70    | 171.14    | 138.59    | 102.95    | 85.30     | 72.67     | 57.41     | 54.31     | 53.22         | 11.15                     | 9.03       | 6.65       | 4.68     | 4.58          | 2.54                                | -16.78     | -26.19     | -51.05                              | -72.09     |
| <b>35</b>     | 266.49                                                               | 181.84    | 174.01    | 136.26    | 101.11    | 84.12     | 71.97     | 56.56     | 53.68     | 52.20         | 11.08                     | 9.10       | 6.76       | 4.68     | <i>Ovrlp.</i> | 2.59                                | -16.46     | -25.34     | -49.79                              | -70.05     |
| <b>37</b>     | 264.70                                                               | 180.72    | 172.75    | 135.33    | 100.42    | 83.70     | 71.72     | 56.23     | 53.43     | 51.78         | 11.06                     | 9.12       | 6.81       | 4.68     | <i>Ovrlp.</i> | 2.61                                | -16.35     | -25.05     | -49.30                              | -69.21     |
| <b>40</b>     | 262.13                                                               | 179.12    | 171.00    | 134.04    | 99.41     | 83.03     | 71.33     | 55.76     | 53.07     | 51.12         | 11.02                     | 9.16       | 6.87       | 4.68     | 4.82          | 2.63                                | -16.13     | -24.50     | -48.59                              | -68.09     |
| <b>45</b>     | 257.96                                                               | 176.44    | 168.11    | 131.88    | 97.79     | 82.00     | 70.70     | 54.97     | 52.47     | 50.27         | 10.97                     | 9.22       | 6.98       | 4.68     | 4.93          | 2.67                                | -15.79     | -23.68     | -47.42                              | -66.17     |
| <b>50</b>     | 253.93                                                               | 173.84    | 165.34    | 129.78    | 96.17     | 80.96     | 70.09     | 54.23     | 51.90     | 49.20         | 10.91                     | 9.28       | 7.07       | 4.68     | 5.04          | 2.72                                | -15.46     | -22.89     | -46.30                              | -64.32     |
| <b>55</b>     | 249.91                                                               | 171.35    | 162.63    | 127.72    | 94.75     | 79.95     | 69.53     | 53.50     | 51.34     | 48.44         | 10.86                     | 9.34       | 7.17       | 4.68     | 5.15          | 2.76                                | -15.08     | -22.08     | -45.20                              | -62.56     |
| <b>60</b>     | 246.08                                                               | 168.81    | 159.91    | 125.75    | 93.29     | 78.88     | 68.95     | 52.79     | 50.78     | 47.42         | 10.81                     | 9.40       | 7.27       | 4.68     | 5.26          | 2.81                                | -14.65     | -21.32     | -44.15                              | -60.86     |
|               | <b>CT (ppm/°C)</b>                                                   |           |           |           |           |           |           |           |           |               |                           |            |            |          |               |                                     |            |            |                                     |            |
|               | -0.84                                                                | -0.53     | -0.51     | -0.43     | -0.33     | -0.21     | -0.13     | -0.16     | -0.12     | -0.19         | -0.01                     | 0.01       | 0.02       | N/A      | 0.02          | 0.01                                | 0.07       | 0.16       | 0.23                                | 0.38       |
| <b>T (°C)</b> | <b> CT /FWHM (1/°C) *</b>                                            |           |           |           |           |           |           |           |           |               |                           |            |            |          |               |                                     |            |            |                                     |            |
| <b>37</b>     | 0.84                                                                 | 0.45      | 0.45      | 0.36      | 0.17      | 0.20      | 0.19      | 0.53      | 0.84      | 0.10          | 0.13                      | 0.18       | 0.19       | N/A      | N/A           | 0.17                                | 0.10       | 0.14       | 0.30                                | 0.33       |
| <b>T (°C)</b> | <b><math>T_1</math> / (St. Dev.) (ms) **</b>                         |           |           |           |           |           |           |           |           |               |                           |            |            |          |               |                                     |            |            |                                     |            |
| <b>25</b>     | 0.83                                                                 | 1.6       | 1.1       | 3.8       | 0.46      | 0.53      | 1.9       | 4.9       | 9.8       | N/A           | 18                        | 50         | 9.6        | 224      | 54            | 42                                  | 1.2        | 0.81       | 1.1                                 | 0.56       |
|               | (0.01)                                                               | (0.0)     | (0.0)     | (0.2)     | (0.01)    | (0.02)    | (0.0)     | (0.0)     | (0.1)     | N/A           | (0)                       | (0)        | (0.0)      | (16)     | (1)           | (1)                                 | (0.0)      | (0.01)     | (0.0)                               | (0.01)     |



**Table S4 Legend:**

\* – Calculated for FWHM (Hz) measured at 37 °C.

\*\* – Measured at 25 °C.

S – Solvent peak.

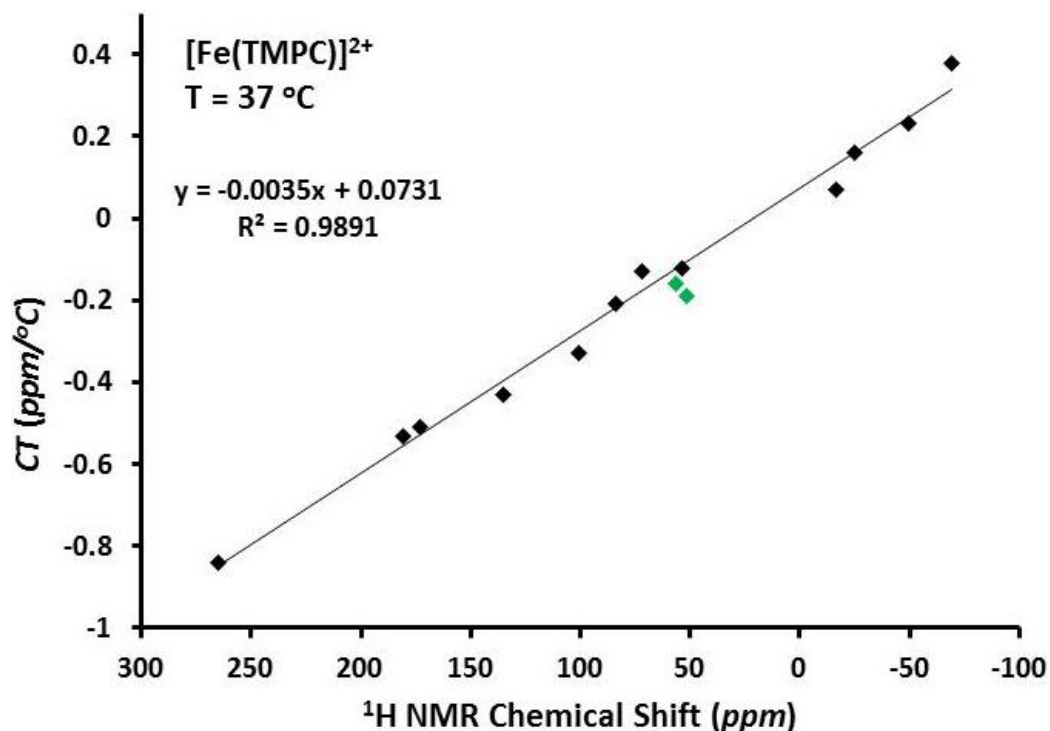

**Figure S26.** Dependence of *CT* values (ppm/°C) of paramagnetically-shifted <sup>1</sup>H NMR resonances on their corresponding chemical shifts at 37 °C for [Fe(TMPC)]<sup>2+</sup>. The proton resonances in diamagnetic region (0-10 ppm) are excluded from consideration. The proton resonances at  $\delta = 51.78$  and  $56.23$  ppm at 37 °C (green diamonds) were omitted from the fitting process. Best-fit slope and intercept are  $-0.0035$  °C<sup>-1</sup> and  $0.0731$  ppm/°C, respectively. Samples contained 100 mM NaCl, D<sub>2</sub>O, pD 7.40.

# $^1\text{H}$ NMR data for $[\text{Fe}(\text{TMPC})]^{2+}$ in water

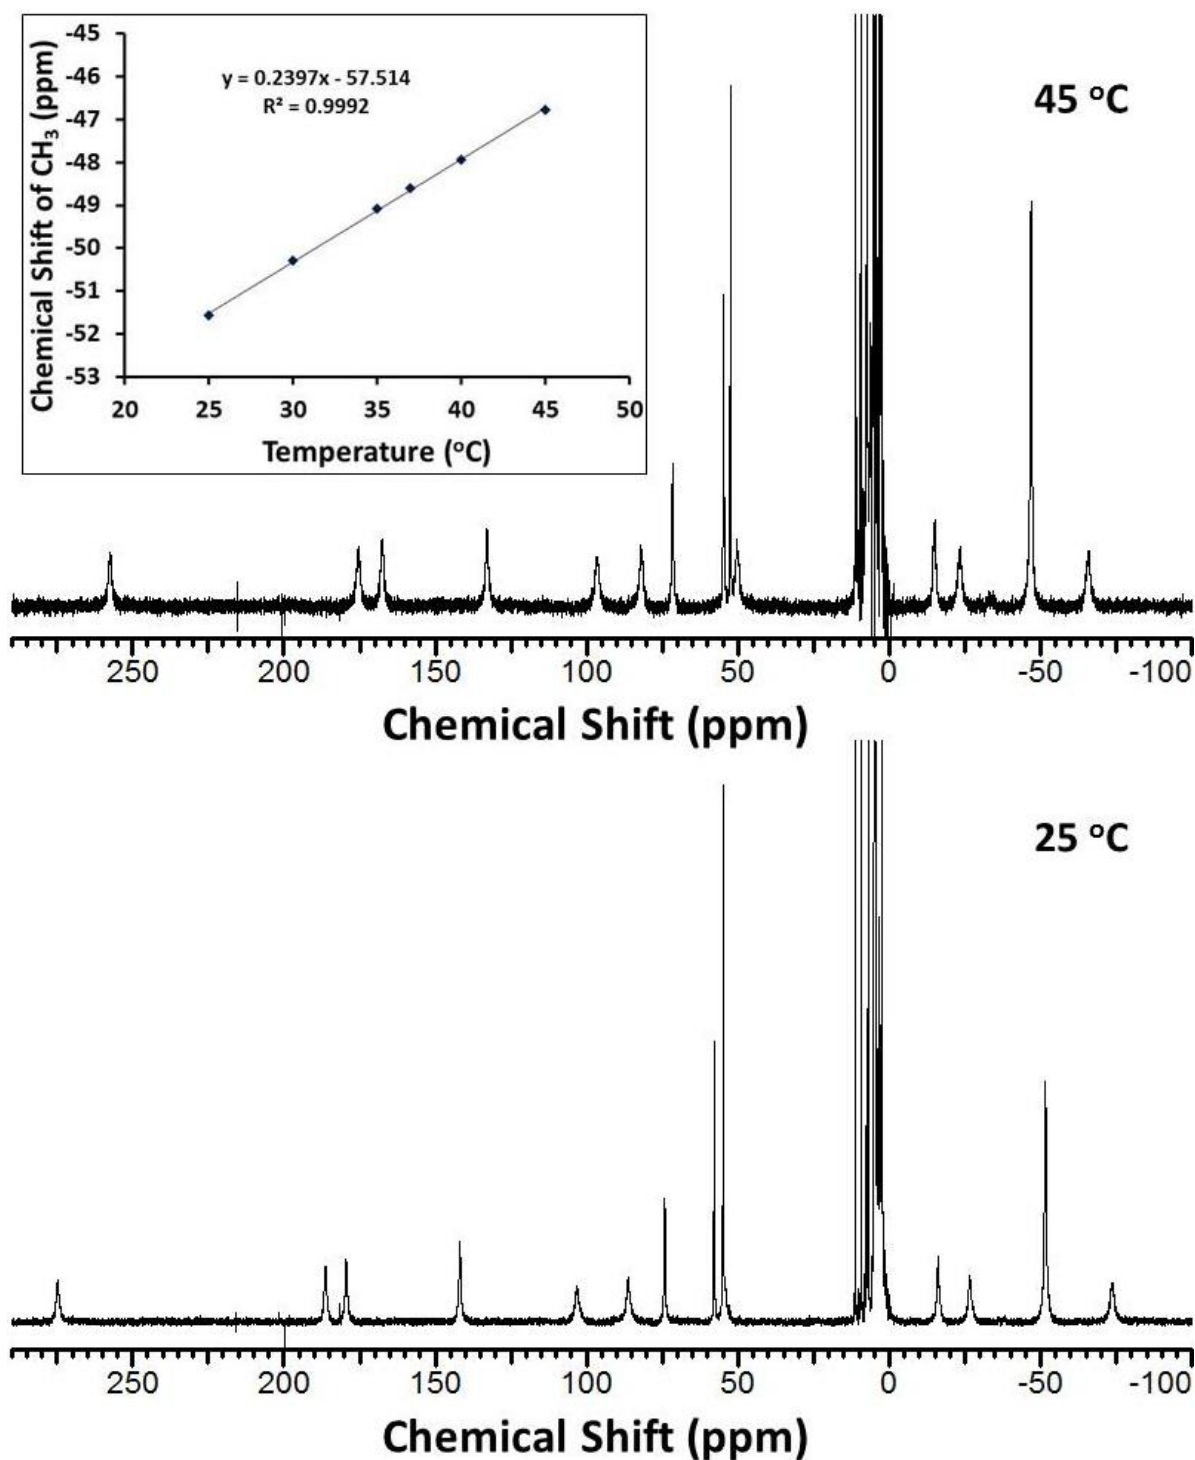

**Figure S27.** Variable temperature  $^1\text{H}$  NMR spectra of  $[\text{Fe}(\text{TMPC})]^{2+}$  at 25 and  $45\text{ }^\circ\text{C}$  in 100 mM NaCl,  $\text{H}_2\text{O}$ , pH 7.40. Insert shows temperature dependence of  $\alpha\text{-CH}_3$  chemical shift of  $[\text{Fe}(\text{MPT})]^{2+}$ , while the solid line presents linear fit of the data.

# $^1\text{H}$ NMR data for $[\text{Co}(\text{TMPC})]^{2+}$

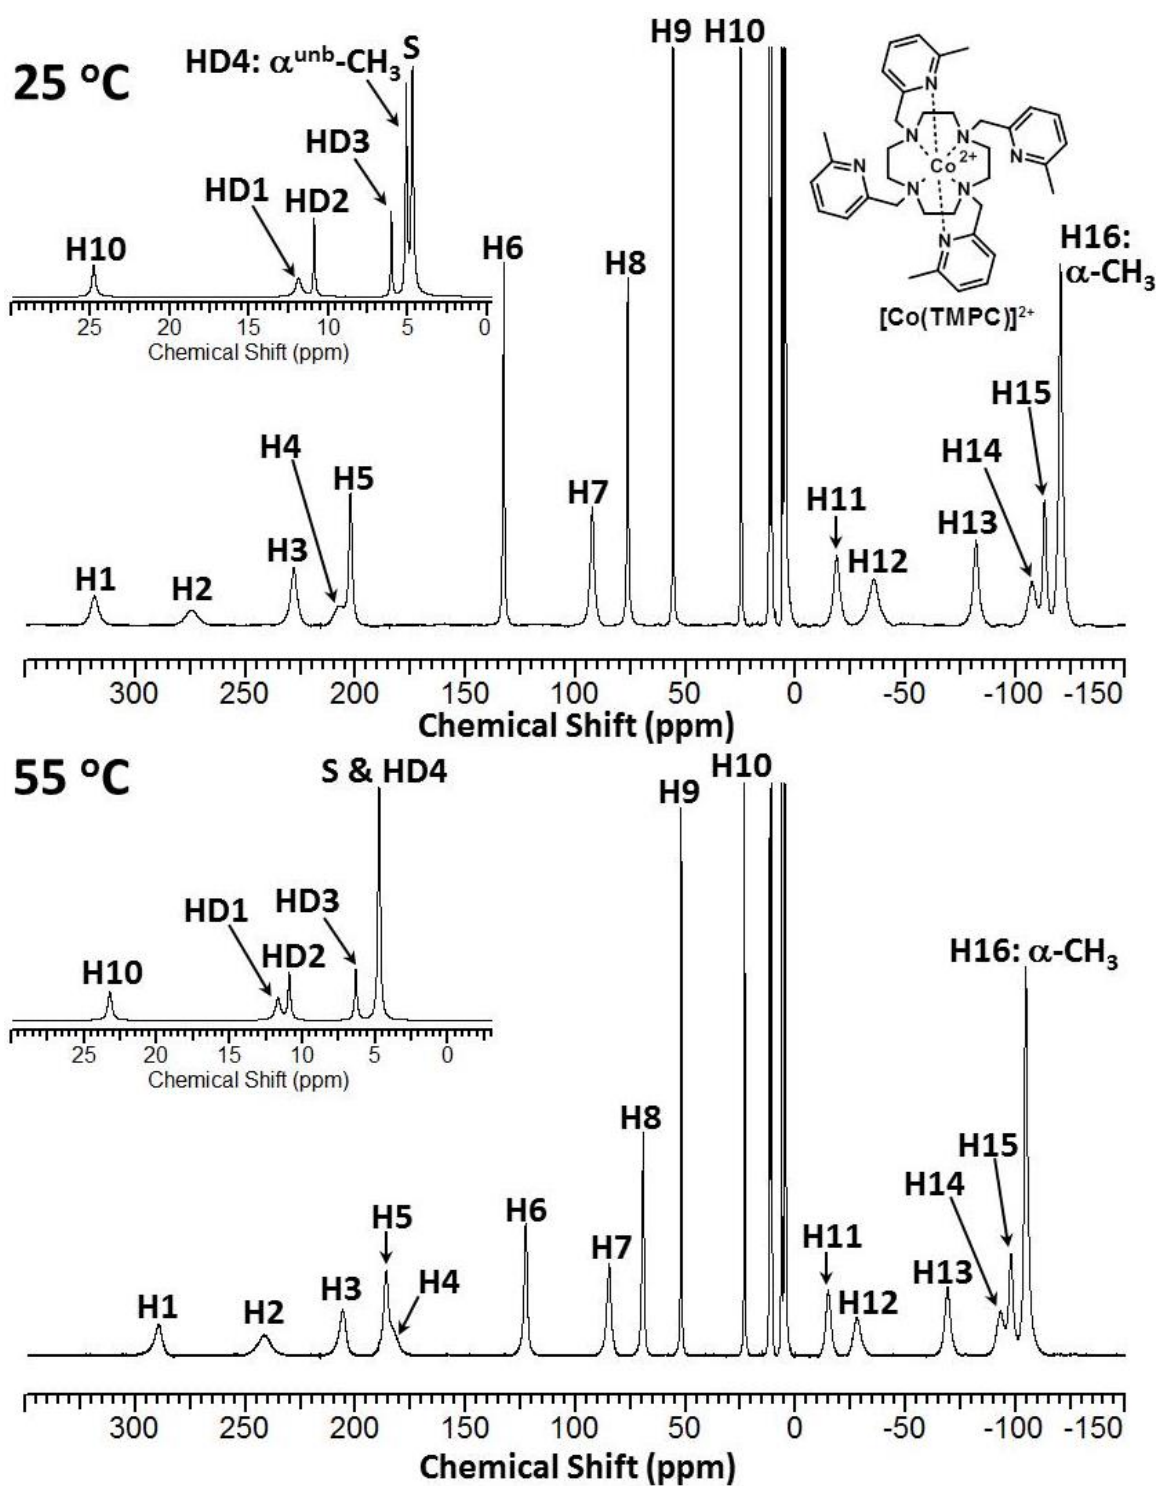

**Figure S28.**  $^1\text{H}$  NMR spectra of  $[\text{Co}(\text{TMPC})]^{2+}$  at 25 °C and 55 °C in 100 mM NaCl,  $\text{D}_2\text{O}$ , pD 7.00. Proton resonances that display significant paramagnetic shifts are labeled H1-H16, while proton resonances that are not shifted from diamagnetic region are labeled HD1-HD4. Inserts show diamagnetic regions with solvent peaks labeled with "S".

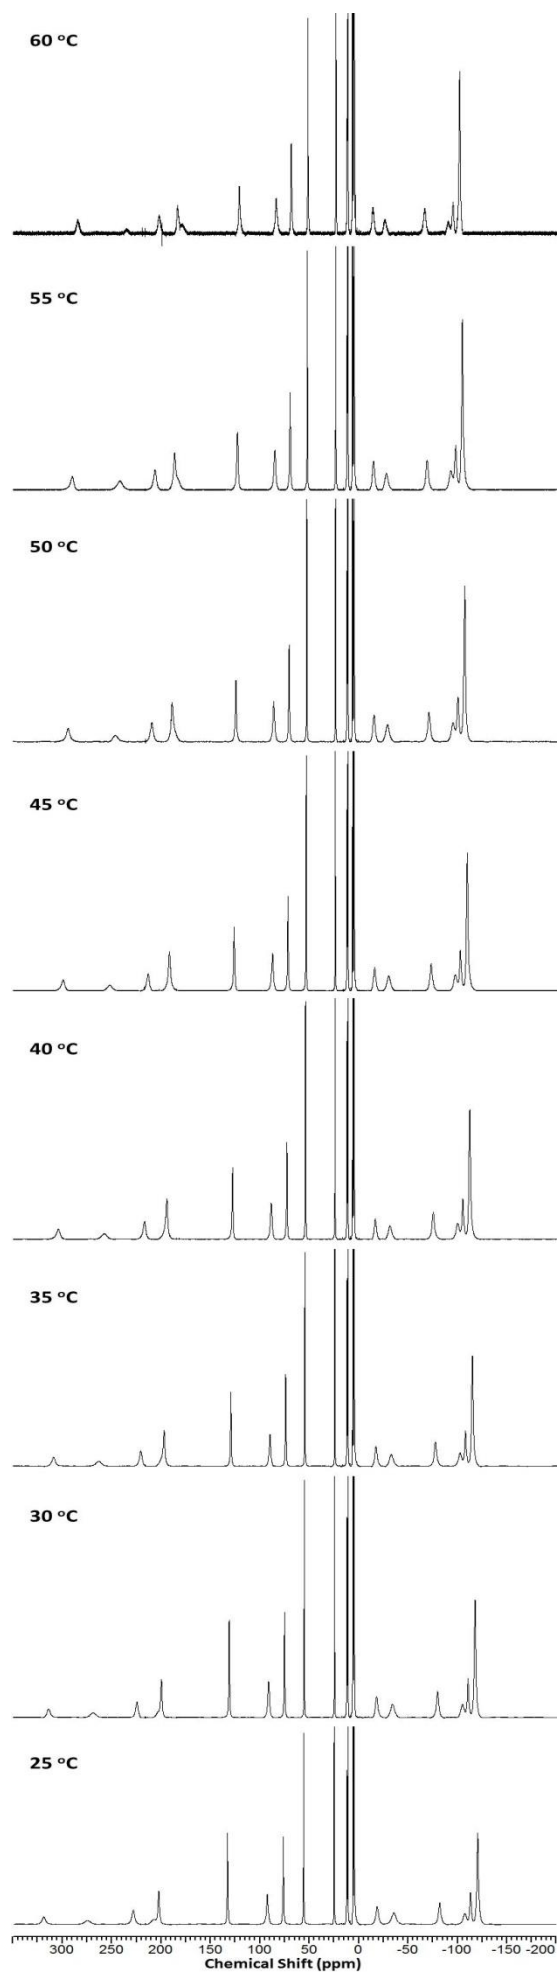

**Figure S29.** Variable temperature  $^1\text{H}$  NMR spectra of  $[\text{Co}(\text{TMPC})]^{2+}$  at 25 to 60 °C in 100 mM NaCl,  $\text{D}_2\text{O}$ , pD 7.00.

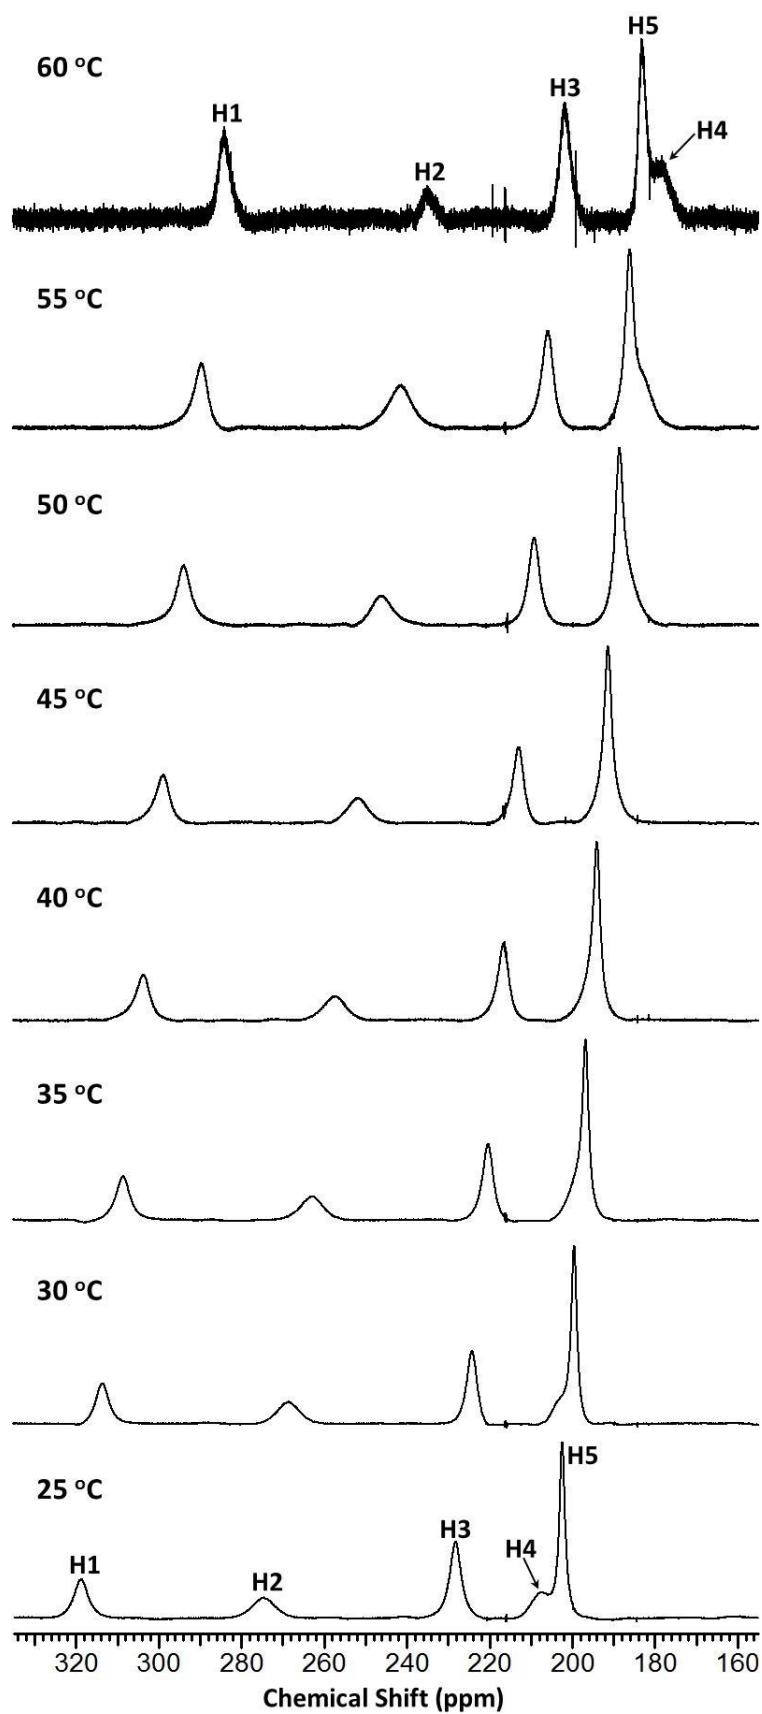

**Figure S30.** Expansion showing  $^1\text{H}$  NMR resonances of some downfield highly-shifted peaks of  $[\text{Co}(\text{TMPC})]^{2+}$  at 25 to 60 °C in 100 mM NaCl,  $\text{D}_2\text{O}$ , pD 7.00.

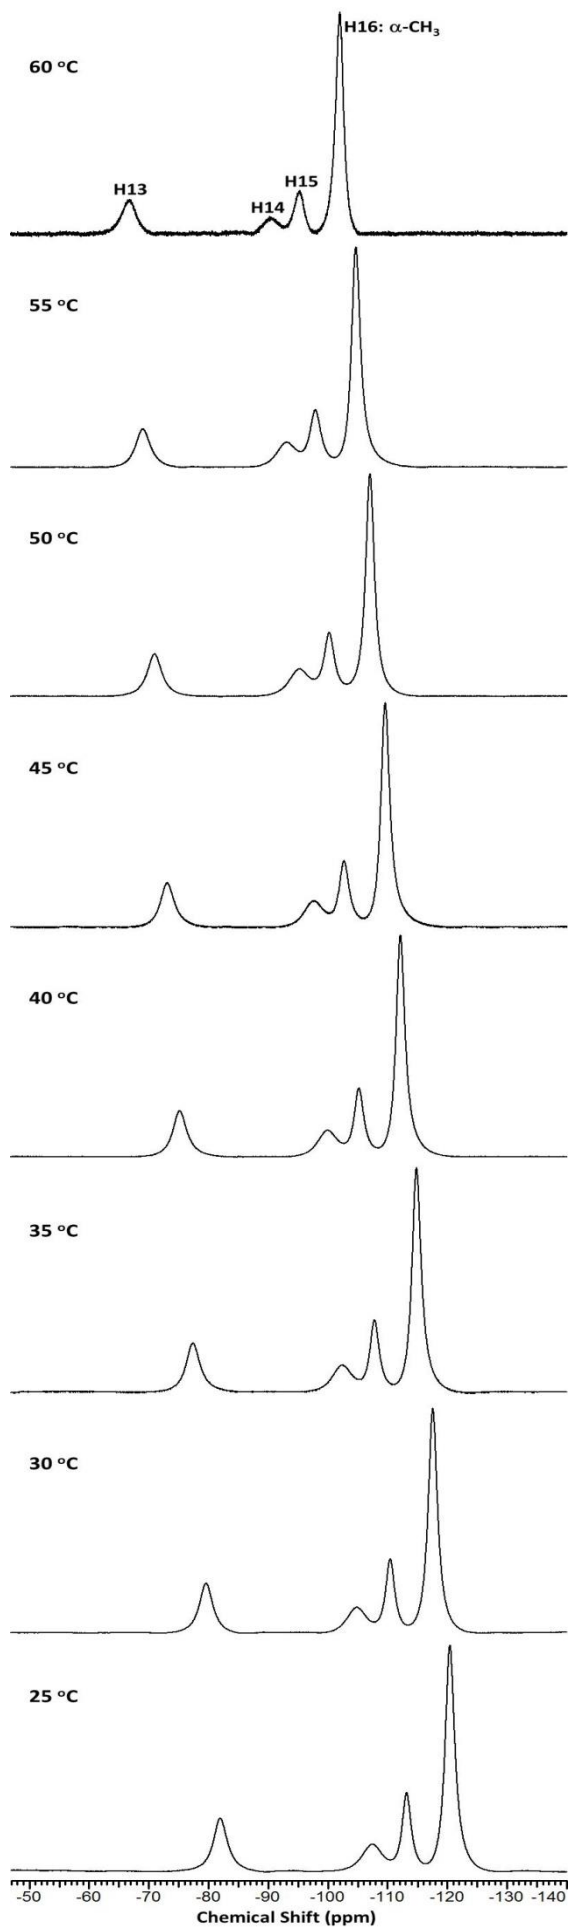

**Figure S31.** Expansion showing <sup>1</sup>H NMR resonances of some highly-shifted peaks, including proton resonances of α-CH<sub>3</sub> groups, of [Co(TMPC)]<sup>2+</sup> at 25 to 60 °C in 100 mM NaCl, D<sub>2</sub>O, pD 7.00.

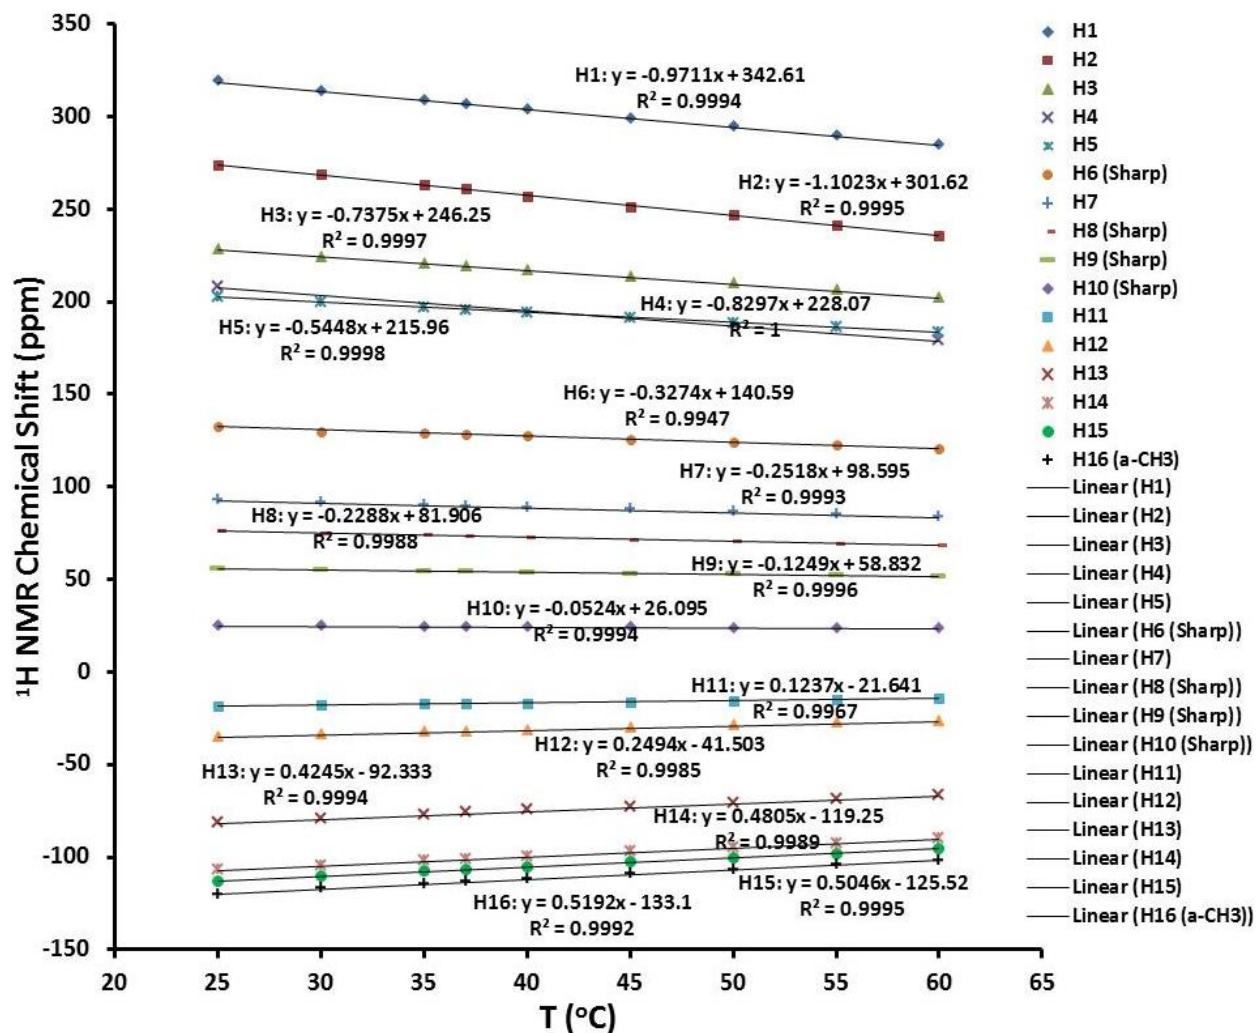

**Figure S32.** Linear fit of temperature-dependent paramagnetically-shifted  $^1\text{H}$  NMR resonances of  $[\text{Co}(\text{TMPC})]^{2+}$  in the range of 25 to 60  $^\circ\text{C}$ . Samples contained 100 mM NaCl,  $\text{D}_2\text{O}$ , pD 7.00.

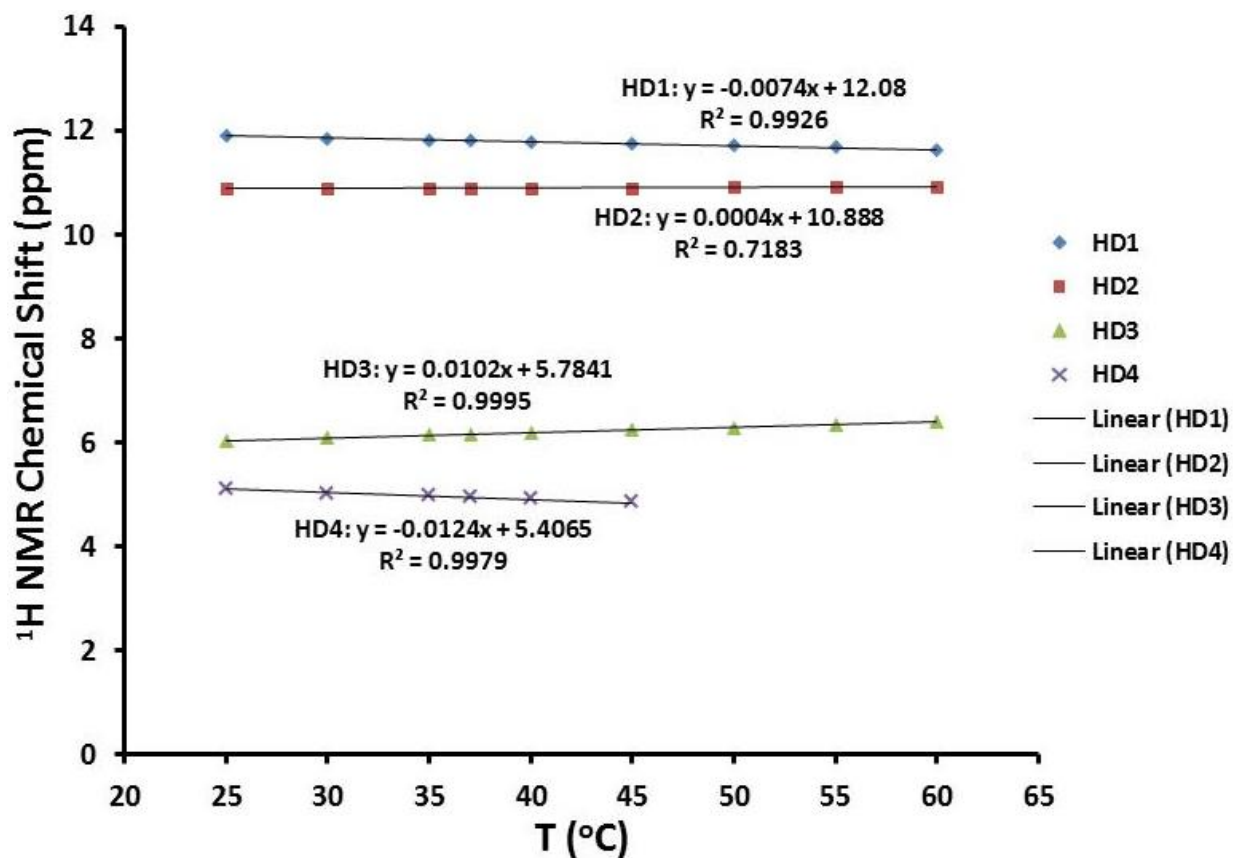

**Figure S33.** Linear fit of temperature-dependent  $^1\text{H}$  NMR resonances in diamagnetic region of  $[\text{Co}(\text{TMPC})]^{2+}$  spectra in the range of 25 to 60  $^{\circ}\text{C}$ . Samples contained in 100 mM NaCl,  $\text{D}_2\text{O}$ , pD 7.00.



**Table S5.** Chemical shift and peak width of  $^1\text{H}$  NMR resonances of  $[\text{Co}(\text{TMPC})]^{2+}$ , 100 mM NaCl,  $\text{D}_2\text{O}$ , pD 7.00, as a function of temperature.

| T<br>(°C)               | Labeled protons of $[\text{Co}(\text{TMPC})]^{2+}$ |        |        |                 |                 |        |        |       |       |       |                    |        |      |                              |      |        |        |        |         |         |                              |
|-------------------------|----------------------------------------------------|--------|--------|-----------------|-----------------|--------|--------|-------|-------|-------|--------------------|--------|------|------------------------------|------|--------|--------|--------|---------|---------|------------------------------|
|                         | H1                                                 | H2     | H3     | H4 <sup>L</sup> | H5 <sup>L</sup> | H6     | H7     | H8    | H9    | H10   | Diamagnetic Region |        |      |                              |      | H11    | H12    | H13    | H14     | H15     | H16:<br>$\alpha\text{-CH}_3$ |
|                         |                                                    |        |        |                 |                 |        |        |       |       |       | HD1                | HD2    | HD3  | HD4:<br>$\alpha\text{-CH}_3$ | S    |        |        |        |         |         |                              |
| Peak width in FWHM (Hz) |                                                    |        |        |                 |                 |        |        |       |       |       |                    |        |      |                              |      |        |        |        |         |         |                              |
| 25                      | 1800                                               | 2450   | 1640   | 4930            | 787             | 323    | 967    | 347   | 163   | 118   | 204                | 44.5   | 40.3 | 52.2                         | 70.7 | 1540   | 2830   | 1380   | 1930    | 855     | 909                          |
| 30                      | 1830                                               | 2100   | 1550   | Overl.          | 846             | 363    | 943    | 347   | 160   | 117   | 190                | 44.1   | 40.3 | 53.1                         | 55.2 | 1490   | 2800   | 1350   | 1870    | 874     | 882                          |
| 35                      | 1950                                               | 2350   | 1440   | Overl.          | 956             | 424    | 928    | 358   | 160   | 117   | 182                | 45.9   | 41.7 | 55.8                         | 44.0 | 1420   | 2450   | 1330   | 1980    | 914     | 873                          |
| 37                      | 2090                                               | 2510   | 1380   | Overl.          | 1030            | 456    | 917    | 367   | 161   | 117   | 180                | 47.3   | 42.9 | 58.1                         | 40.4 | 1420   | 2620   | 1320   | 1910    | 906     | 871                          |
| 40                      | 1920                                               | 2760   | 1450   | Overl.          | 1100            | 499    | 918    | 381   | 164   | 119   | 179                | 50.5   | 45.9 | 45.6                         | 36.2 | 1380   | 2410   | 1310   | 1950    | 936     | 872                          |
| 45                      | 2010                                               | 3130   | 1370   | Overl.          | 1190            | 584    | 917    | 408   | 174   | 125   | 181                | 58.7   | 53.7 | Overl.                       | 31.2 | 1340   | 2240   | 1310   | 2020    | 967     | 865                          |
| 50                      | 1900                                               | 3070   | 1460   | Overl.          | 1250            | 684    | 950    | 448   | 190   | 136   | 188                | 71.8   | 65.9 | Overl.                       | 27.3 | 1310   | 2140   | 1330   | 2010    | 1020    | 870                          |
| 55                      | 1800                                               | 2700   | 1420   | Overl.          | 1360            | 773    | 990    | 476   | 208   | 153   | 206                | 92.7   | 86.0 | Overl.                       | 23.0 | 1290   | 2130   | 1360   | Overl.  | 1140    | 859                          |
| 60                      | Broad                                              | Broad  | Broad  | 1420            | 1060            | 811    | 831    | 447   | 214   | 173   | 236                | 125    | 113  | Overl.                       | 12.8 | 952    | 1560   | 938    | Overl.  | 1270    | 802                          |
| T (°C)                  | $^1\text{H}$ NMR Chemical shift (ppm)              |        |        |                 |                 |        |        |       |       |       |                    |        |      |                              |      |        |        |        |         |         |                              |
| 25                      | 318.76                                             | 274.12 | 228.06 | 207.33          | 202.37          | 132.69 | 92.43  | 76.35 | 55.76 | 24.81 | 11.89              | 10.90  | 6.04 | 5.10                         | 4.71 | -18.67 | -35.38 | -81.86 | -107.30 | -113.14 | -120.45                      |
| 30                      | 313.33                                             | 268.69 | 224.11 | N/A             | 199.74          | 130.10 | 91.05  | 75.07 | 55.09 | 24.52 | 11.85              | 10.90  | 6.09 | 5.03                         | 4.71 | -17.97 | -34.05 | -79.69 | -104.97 | -110.40 | -117.55                      |
| 35                      | 308.42                                             | 263.02 | 220.28 | N/A             | 196.79          | 129.25 | 89.71  | 73.84 | 54.44 | 24.25 | 11.82              | 10.90  | 6.14 | 4.97                         | 4.72 | -17.24 | -32.57 | -77.43 | -102.26 | -107.73 | -114.81                      |
| 37                      | 306.53                                             | 260.93 | 218.85 | N/A             | 195.71          | 128.58 | 89.23  | 73.37 | 54.18 | 24.14 | 11.81              | 10.90  | 6.16 | 4.94                         | 4.72 | -16.94 | -32.40 | -76.57 | -101.44 | -106.76 | -113.73                      |
| 40                      | 303.63                                             | 257.31 | 216.65 | N/A             | 194.10          | 127.58 | 88.44  | 72.64 | 53.80 | 23.98 | 11.79              | 10.90  | 6.19 | 4.91                         | 4.72 | -16.68 | -31.49 | -75.18 | -100.01 | -105.23 | -112.15                      |
| 45                      | 298.63                                             | 251.42 | 213.00 | N/A             | 191.42          | 125.94 | 87.19  | 71.54 | 53.18 | 23.73 | 11.75              | 10.90  | 6.24 | 4.85                         | 4.72 | -16.00 | -30.18 | -73.15 | -97.43  | -102.69 | -109.59                      |
| 50                      | 294.42                                             | 246.95 | 209.48 | N/A             | 188.79          | 124.34 | 86.03  | 70.44 | 52.59 | 23.47 | 11.71              | 10.91  | 6.29 | N/A                          | 4.72 | -15.44 | -29.01 | -71.06 | -95.28  | -100.32 | -107.13                      |
| 55                      | 289.46                                             | 241.11 | 205.89 | N/A             | 186.07          | 122.61 | 84.85  | 69.38 | 51.99 | 23.23 | 11.68              | 10.91  | 6.34 | N/A                          | 4.72 | -14.94 | -27.76 | -68.97 | -93.21  | -97.86  | -104.66                      |
| 60                      | 284.21                                             | 235.44 | 201.94 | 178.29          | 183.23          | 120.77 | 83.49  | 68.28 | 51.35 | 22.95 | 11.62              | 10.91  | 6.40 | N/A                          | 4.72 | -14.24 | -26.66 | -67.05 | -90.22  | -95.33  | -102.11                      |
|                         | CT (ppm/°C)                                        |        |        |                 |                 |        |        |       |       |       |                    |        |      |                              |      |        |        |        |         |         |                              |
|                         | -0.97                                              | -1.10  | -0.74  | -0.83           | -0.55           | -0.33  | -0.25  | -0.23 | -0.13 | -0.05 | -0.01              | 0.4E-3 | 0.01 | -0.01                        | N/A  | 0.12   | 0.25   | 0.43   | 0.48    | 0.51    | 0.52                         |
| T (°C)                  | CT /FWHM (1/°C) *                                  |        |        |                 |                 |        |        |       |       |       |                    |        |      |                              |      |        |        |        |         |         |                              |
| 37                      | 0.23                                               | 0.22   | 0.27   | N/A             | 0.27            | 0.36   | 0.14   | 0.31  | 0.40  | 0.21  | 0.03               | 4.2E-3 | 0.12 | 0.09                         | N/A  | 0.04   | 0.05   | 0.16   | 0.13    | 0.28    | 0.30                         |
| T (°C)                  | $T_1$ / (St. Dev.) (ms) **                         |        |        |                 |                 |        |        |       |       |       |                    |        |      |                              |      |        |        |        |         |         |                              |
| 25                      | 0.14                                               | N/A    | 0.21   | N/A             | 0.51            | 2.5    | 0.36   | 1.0   | 2.5   | 3.6   | 2.2                | 14     | 19   | 17                           | 84   | 0.19   | N/A    | 0.28   | 0.14    | 0.48    | 0.37                         |
|                         | (0.03)                                             | N/A    | (0.01) | N/A             | (0.01)          | (0.0)  | (0.01) | (0.0) | (0.2) | (0.1) | (0.0)              | (0)    | (0)  | (0)                          | (0)  | (0.03) | N/A    | (0.01) | (0.02)  | (0.01)  | (0.01)                       |

**Table S5 Legend:**

\* – Calculated for FWHM (Hz) measured at 37 °C.

\*\* – Measured at 25 °C.

⊥ – <sup>1</sup>H NMR resonances H4 and H5 switch order at 60 °C.

S – Solvent peak.

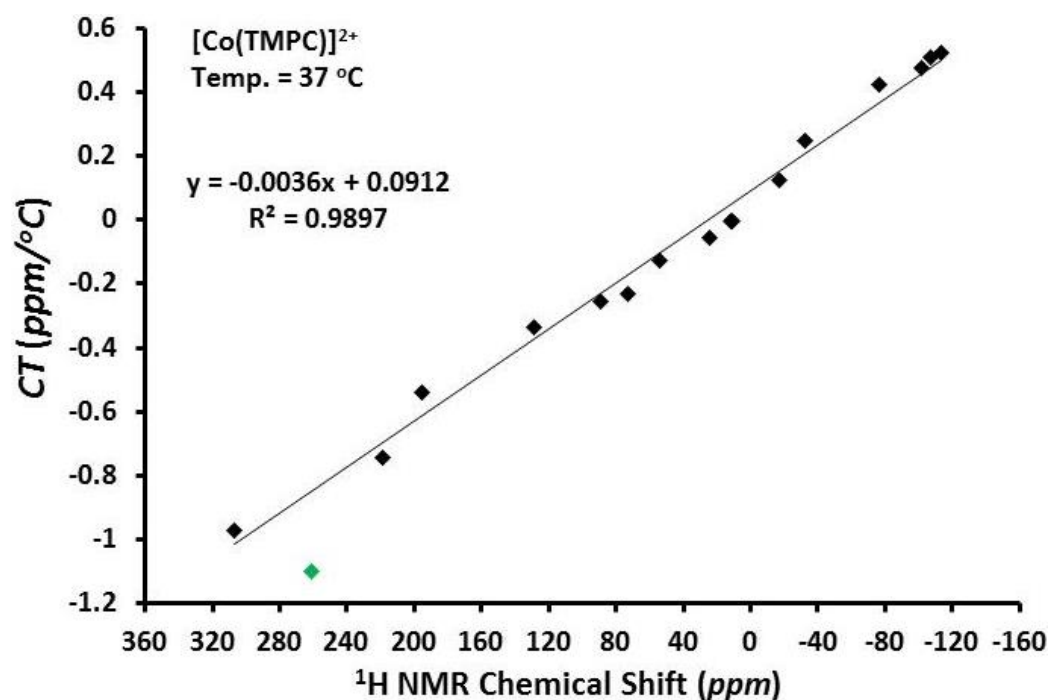

**Figure S34.** Dependence of *CT* values (ppm/°C) of paramagnetically-shifted <sup>1</sup>H NMR resonances on their corresponding chemical shifts at 37 °C for [Co(TMPC)]<sup>2+</sup>. The proton resonances in diamagnetic region (0-10 ppm) are excluded from consideration. The proton resonance at  $\delta = 260.93$  ppm at 37 °C (green diamond) was omitted from the fitting process. Best-fit slope and intercept are  $-0.0036$  °C<sup>-1</sup> and  $0.0912$  ppm/°C, respectively. Samples contained 100 mM NaCl, D<sub>2</sub>O, pD 7.00.

**Table S6. Longitudinal relaxation times ( $T_1$ ) of hyperfine-shifted proton resonances**

| Proton type                 | [Co(MPT)] <sup>2+</sup>  |                 |                 |                 |                 |                 |                   |                 |                 |                 |                 |                 |                 |                 |                |                |
|-----------------------------|--------------------------|-----------------|-----------------|-----------------|-----------------|-----------------|-------------------|-----------------|-----------------|-----------------|-----------------|-----------------|-----------------|-----------------|----------------|----------------|
|                             | CH <sub>2</sub>          | CH <sub>2</sub> | CH <sub>2</sub> | CH <sub>2</sub> | β-H             | β'-H            | α-CH <sub>3</sub> | γ-H             | CH <sub>2</sub> | CH <sub>2</sub> |                 |                 |                 |                 |                |                |
| δ (ppm)                     | 199.48                   | 186.23          | 117.50          | 64.63           | 49.38           | 33.21           | 8.03              | 5.38            | -12.12          | -23.10          |                 |                 |                 |                 |                |                |
| $T_1$<br>(St. Dev.)<br>(ms) | 8.3<br>(0.2)             | 7.3<br>(0.2)    | 7.0<br>(0.1)    | 4.6<br>(0.1)    | 50<br>(1)       | 38<br>(1)       | 5.7<br>(0.1)      | 102<br>(3)      | 2.2<br>(0.1)    | 2.3<br>(0.1)    |                 |                 |                 |                 |                |                |
| Proton type                 | [Fe(MPT)] <sup>2+</sup>  |                 |                 |                 |                 |                 |                   |                 |                 |                 |                 |                 |                 |                 |                |                |
|                             | CH <sub>2</sub>          | CH <sub>2</sub> | CH <sub>2</sub> | CH <sub>2</sub> | β-H             | β'-H            | α-CH <sub>3</sub> | γ-H             | CH <sub>2</sub> | CH <sub>2</sub> |                 |                 |                 |                 |                |                |
| δ (ppm)                     | 195.45                   | 168.36          | 98.46           | 72.09           | 52.14           | 33.33           | 21.22             | -4.34           | -11.63          | -19.65          |                 |                 |                 |                 |                |                |
| $T_1$<br>(St. Dev.)<br>(ms) | 4.4<br>(0.1)             | 3.7<br>(0.2)    | 3.8<br>(0.1)    | 2.4<br>(0.1)    | 30<br>(1)       | 21<br>(2)       | 2.4<br>(0.1)      | 63<br>(1)       | 1.1<br>(0.1)    | 1.2<br>(0.2)    |                 |                 |                 |                 |                |                |
| Proton type                 | [Fe(TMPC)] <sup>2+</sup> |                 |                 |                 |                 |                 |                   |                 |                 |                 |                 |                 |                 |                 |                |                |
|                             | CH <sub>2</sub>          | CH <sub>2</sub> | CH <sub>2</sub> | CH <sub>2</sub> | CH <sub>2</sub> | CH <sub>2</sub> | CH <sub>2</sub>   | CH <sub>2</sub> | CH <sub>2</sub> | CH <sub>2</sub> | CH <sub>2</sub> | CH <sub>2</sub> | CH <sub>2</sub> | CH <sub>2</sub> |                |                |
| δ (ppm)                     | 275.55                   | 187.51          | 180.22          | 140.87          | 104.68          | 86.42           | 73.34             | 58.26           | 54.93           | 53.7*           | -17.11          | -27.06          | -52.34          | -74.14          |                |                |
| $T_1$<br>(St. Dev.)<br>(ms) | 0.83<br>(0.01)           | 1.6<br>(0.0)    | 1.1<br>(0.0)    | 3.8<br>(0.2)    | 0.46<br>(0.01)  | 0.53<br>(0.02)  | 1.9<br>(0.0)      | 4.9<br>(0.0)    | 9.8<br>(0.1)    | N/A             | 1.2<br>(0.0)    | 0.81<br>(0.01)  | 1.1<br>(0.0)    | 0.56<br>(0.01)  |                |                |
| Proton type                 | [Co(TMPC)] <sup>2+</sup> |                 |                 |                 |                 |                 |                   |                 |                 |                 |                 |                 |                 |                 |                |                |
|                             | CH <sub>2</sub>          | CH <sub>2</sub> | CH <sub>2</sub> | CH <sub>2</sub> | CH <sub>2</sub> | CH <sub>2</sub> | CH <sub>2</sub>   | CH <sub>2</sub> | CH <sub>2</sub> | CH <sub>2</sub> | CH <sub>2</sub> | CH <sub>2</sub> | CH <sub>2</sub> | CH <sub>2</sub> |                |                |
| δ (ppm)                     | 318.76                   | 274.12          | 228.06          | 207.33          | 202.37          | 132.69          | 92.43             | 76.35           | 55.76           | 24.81           | -18.67          | -35.38          | -81.86          | -107.30         | -113.14        | -120.45        |
| $T_1$<br>(St. Dev.)<br>(ms) | 0.14<br>(0.03)           | N/A             | 0.21<br>(0.01)  | N/A             | 0.51<br>(0.01)  | 2.5<br>(0.0)    | 0.36<br>(0.01)    | 1.0<br>(0.0)    | 2.5<br>(0.2)    | 3.6<br>(0.1)    | 0.19<br>(0.03)  | N/A             | 0.28<br>(0.01)  | 0.14<br>(0.02)  | 0.48<br>(0.01) | 0.37<br>(0.01) |

Chemical shifts of proton resonances,  $\delta$  (ppm), and longitudinal relaxation times,  $T_1$  (ms), are obtained at 25 °C.

N/A – Data is not reported due to line broadening or overlap of proton resonances.

\* – The peak is broadened at 25 °C.

# $^1\text{H}$ NMR data for $[\text{Fe}(\text{TPC})]^{2+}$

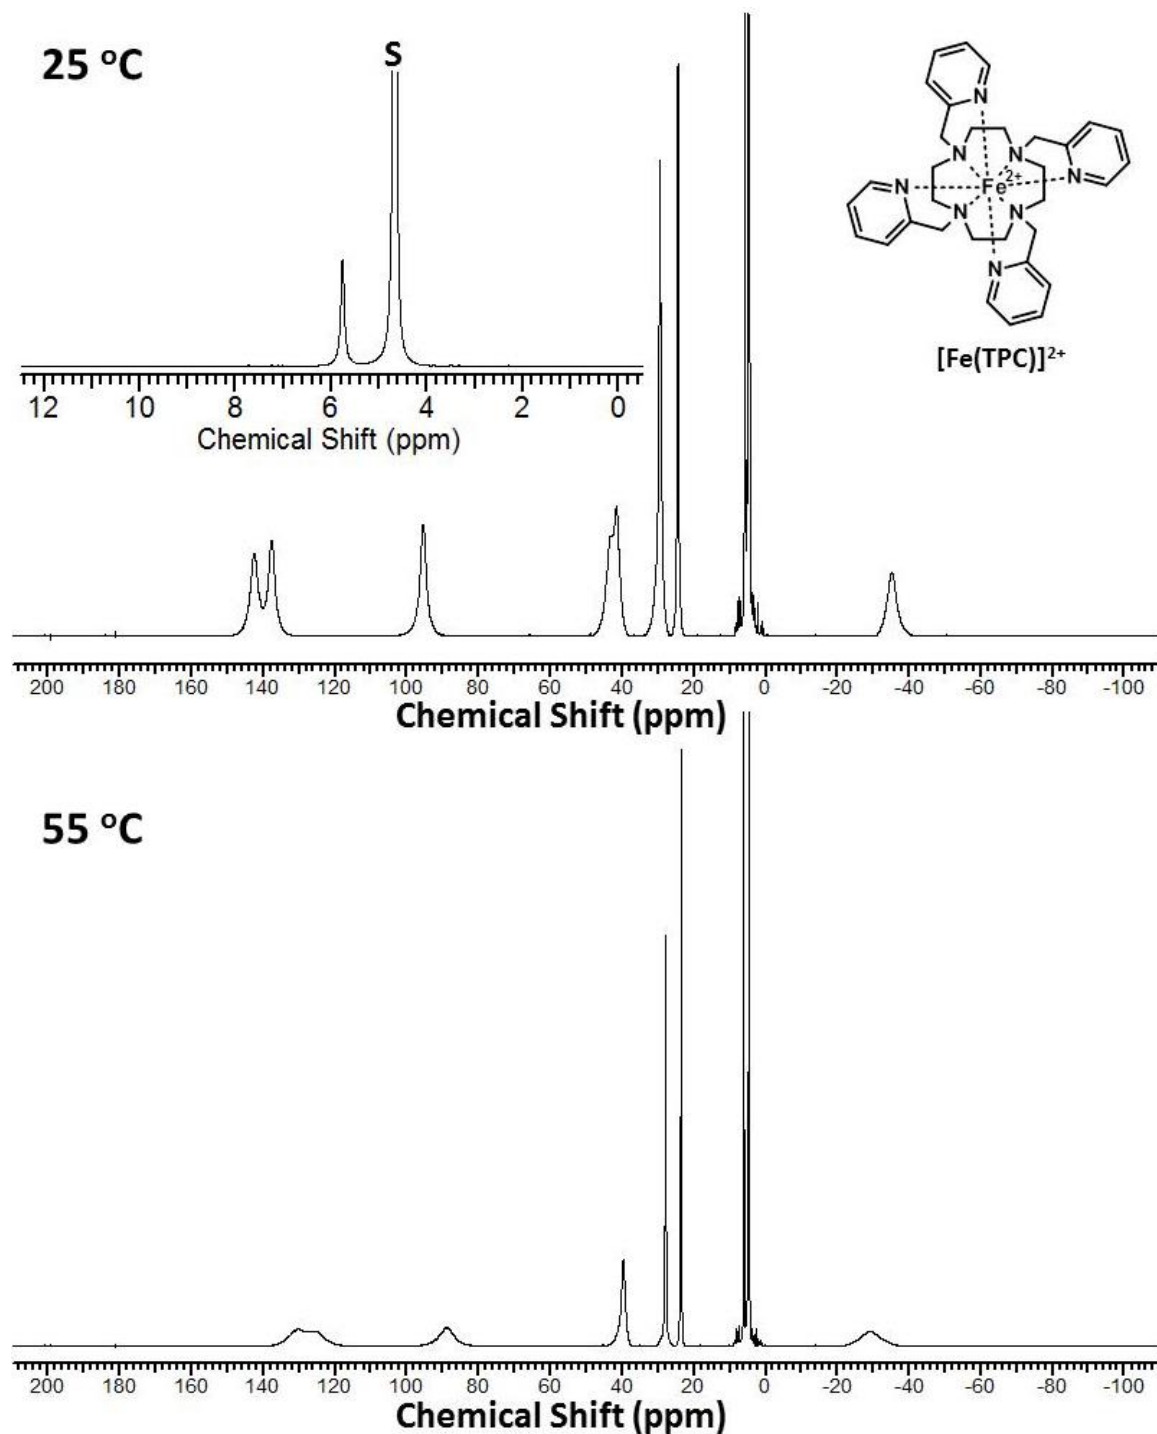

**Figure S35.**  $^1\text{H}$  NMR spectra of  $[\text{Fe}(\text{TPC})]^{2+}$  at 25 °C and 55 °C in 100 mM NaCl,  $\text{D}_2\text{O}$ , pD 7.00. Insert shows diamagnetic region with solvent peak labeled with “S”.

$^1\text{H}$  NMR data for  $[\text{Co}(\text{TPC})]^{2+}$

25 °C

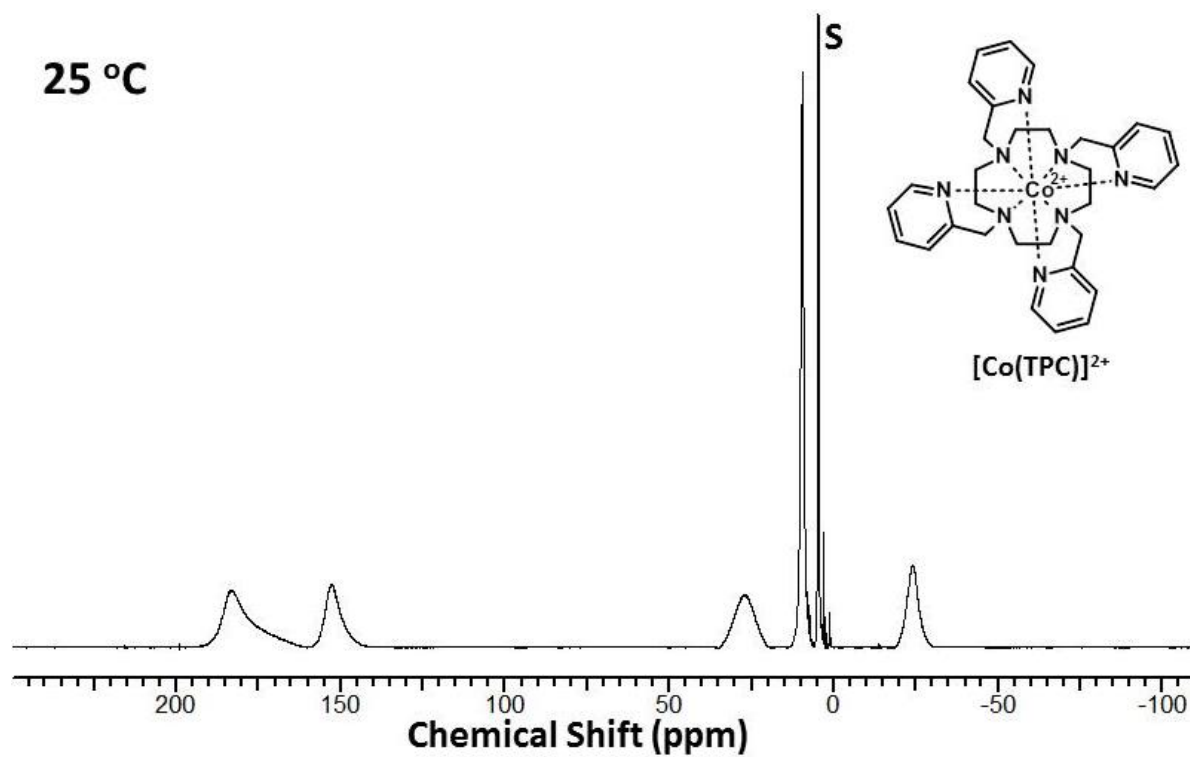

**Figure S36.**  $^1\text{H}$  NMR spectrum of  $[\text{Co}(\text{TPC})]^{2+}$  at 25 °C in 100 mM NaCl,  $\text{D}_2\text{O}$ , pD 6.90. Solvent peak labeled with "S".

pH dependence of  $^1\text{H}$  NMR resonances of  $[\text{Fe}(\text{TMPC})]^{2+}$

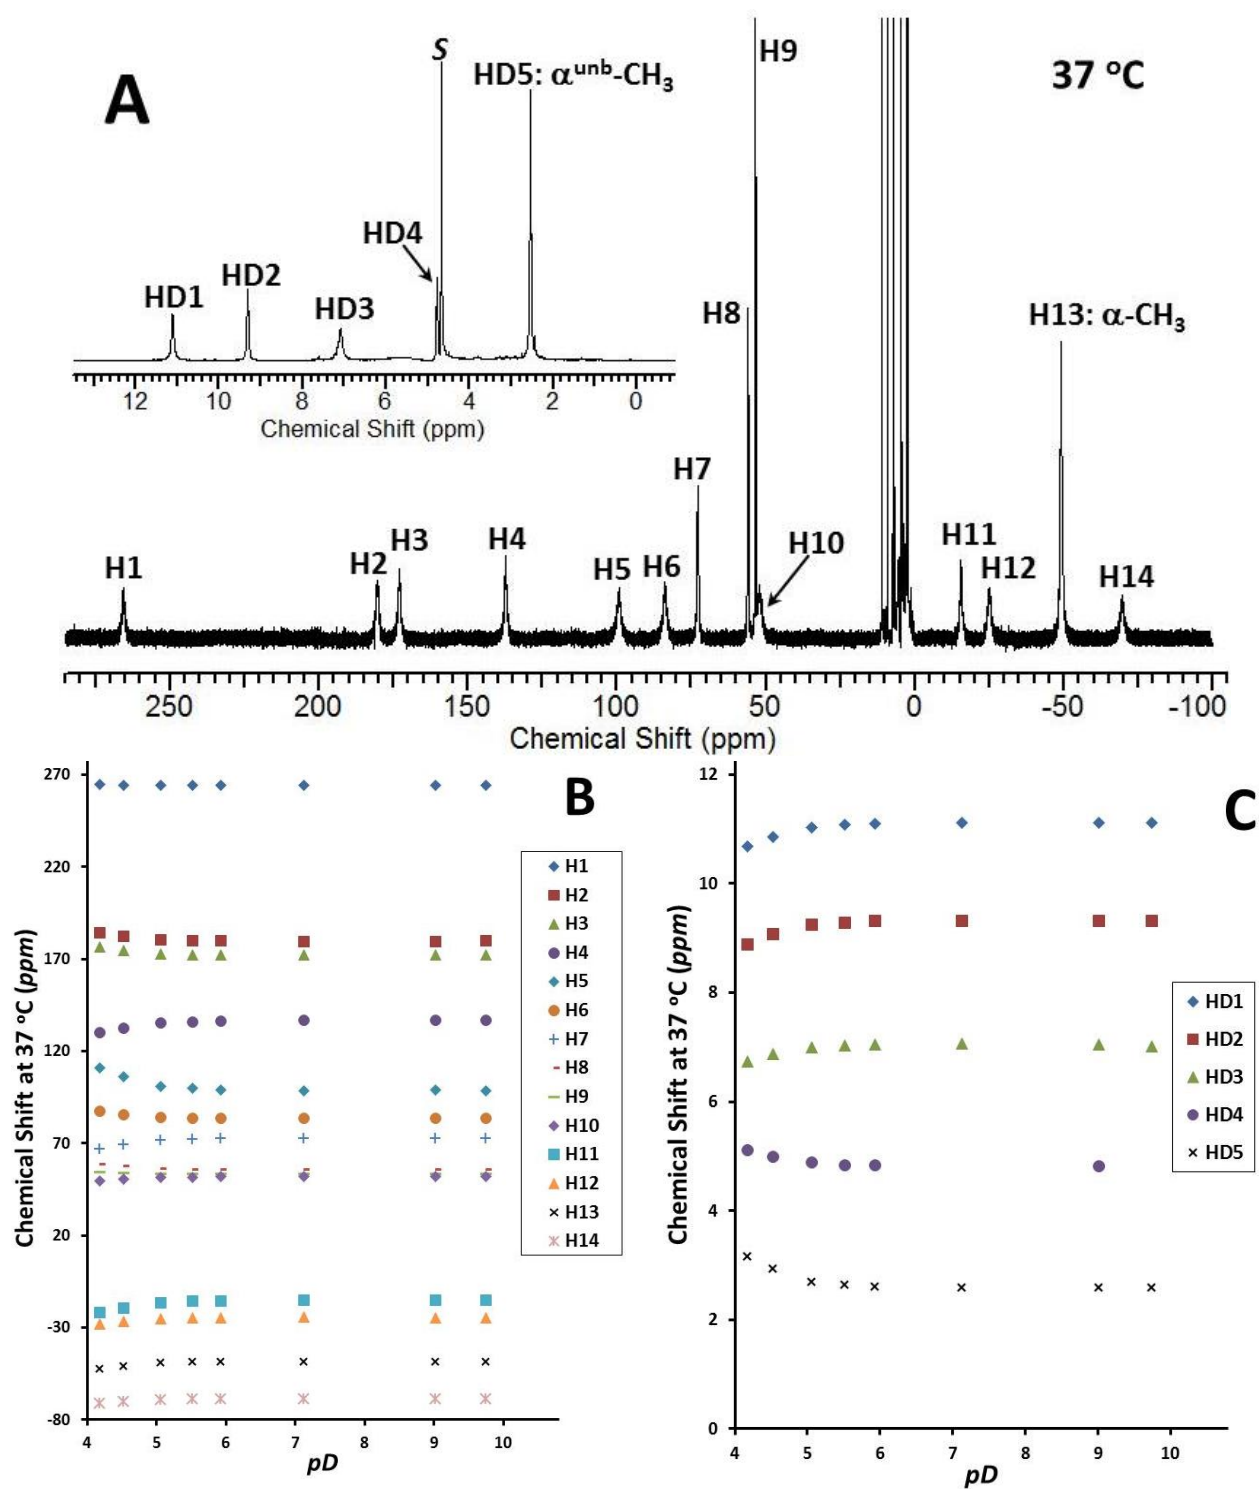

**Figure S37.** A)  $^1\text{H}$  NMR spectrum of  $[\text{Fe}(\text{TMPC})]^{2+}$  in  $\text{D}_2\text{O}$  (100 mM NaCl, pD 7.2) with labeled protons, where insert shows expanded diamagnetic region, and a pD dependence of B) highly paramagnetically shifted proton resonances, and C) proton resonances in diamagnetic region of 20 mM  $[\text{Fe}(\text{TMPC})]^{2+}$  in  $\text{D}_2\text{O}$  solution containing 100 mM NaCl at 37 °C.

## Acid dissociation studies

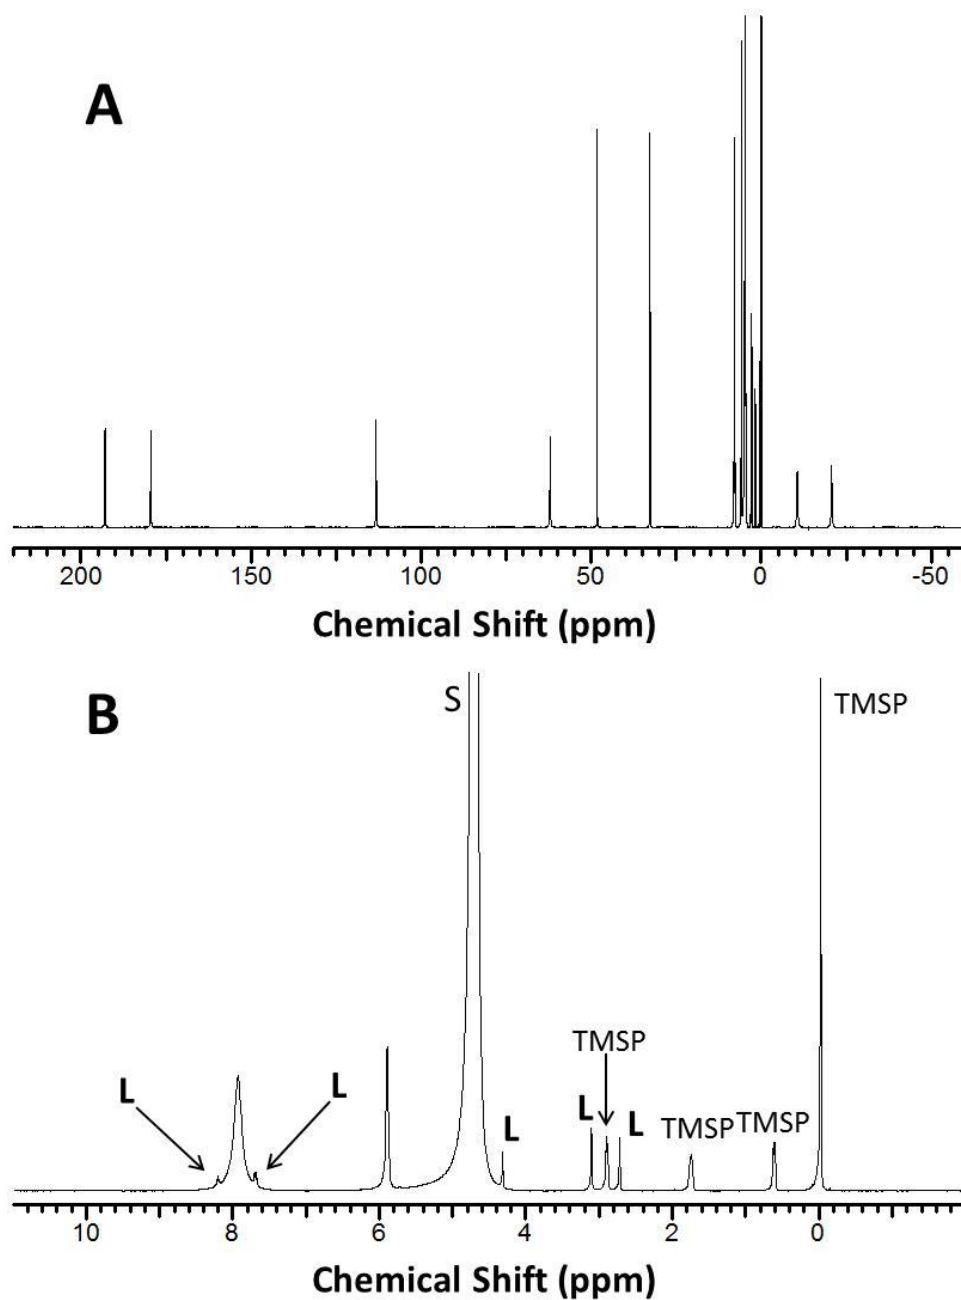

**Figure S38.** A) <sup>1</sup>H NMR (37 °C) of [Co(MPT)]<sup>2+</sup> after incubation at pH 3.0(1) at 37 °C for 48 h. B) Expanded diamagnetic region showing TMSP proton resonances and proton resonances of a free MPT ligand (L) produced due to the complex dissociation.

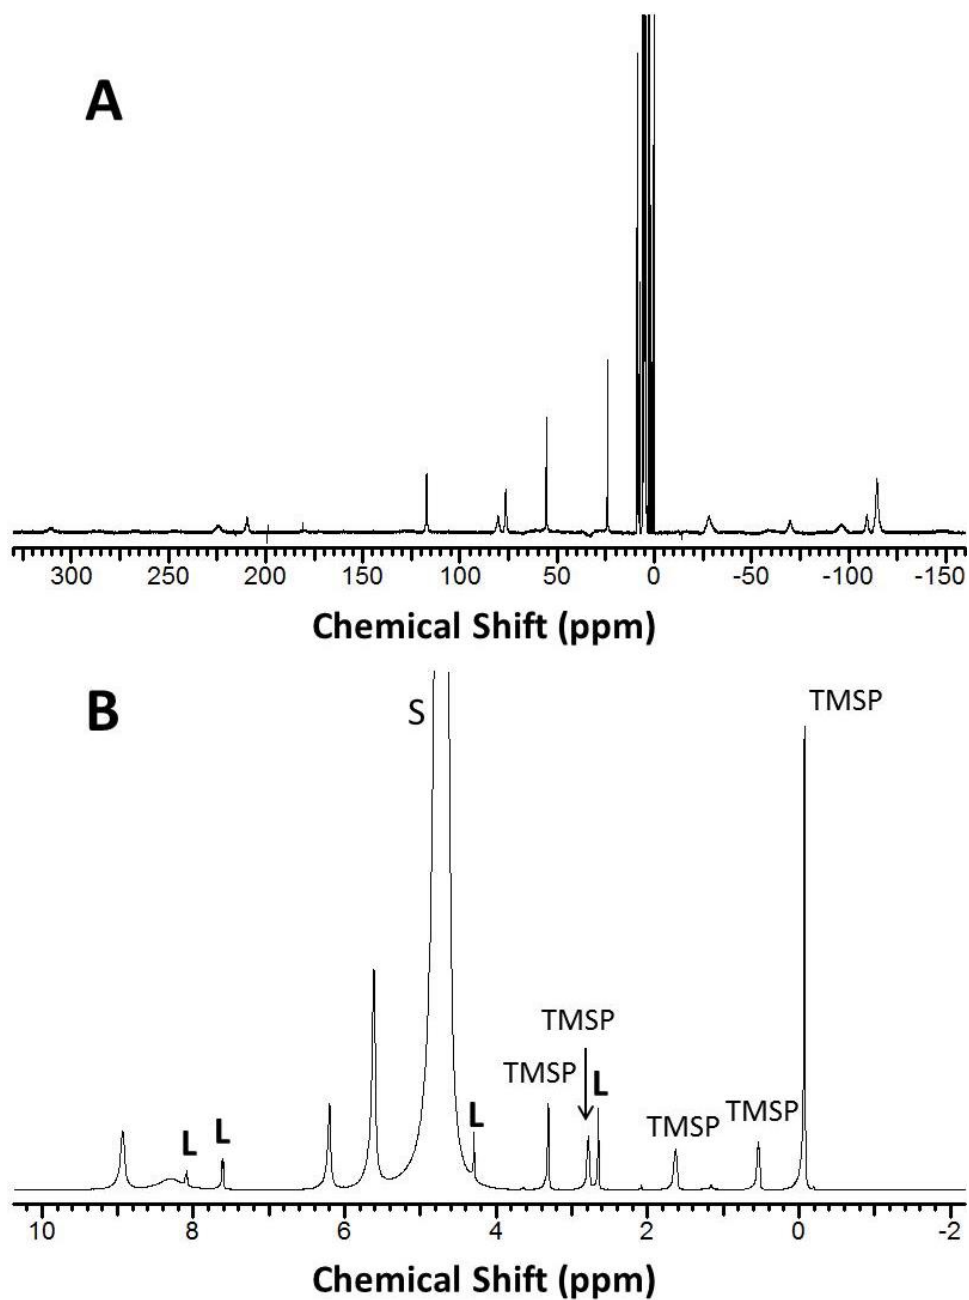

**Figure S39.** A) <sup>1</sup>H NMR (37 °C) of [Co(TMPC)]<sup>2+</sup> after incubation at pH 3.0(1) at 37 °C for 48 h. B) Expanded diamagnetic region showing TMSP proton resonances and proton resonances of a free TMPC ligand (L) produced due to the complex dissociation.



# $^1\text{H}$ NMR temperature dependence of $[\text{Fe}(\text{TMPC})]^{2+}$ in serum albumin

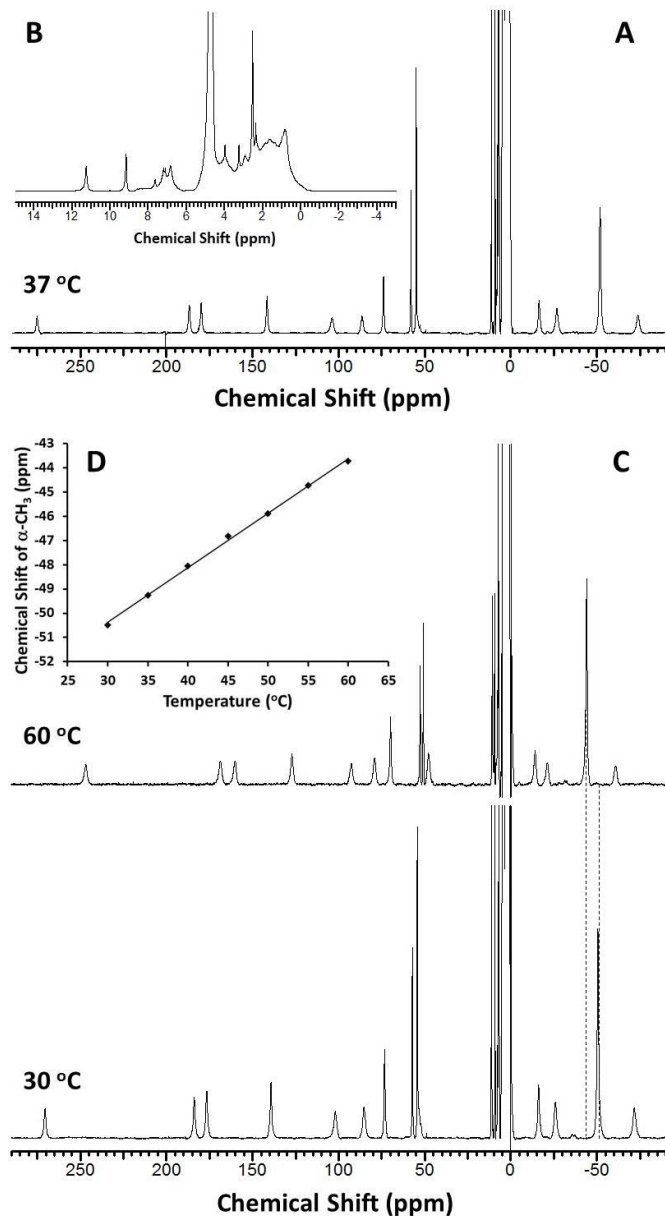

**Figure S40.**  $^1\text{H}$  NMR spectra of 10 mM  $[\text{Fe}(\text{TMPC})]^{2+}$  in serum albumin (35 mg/mL) in  $\text{D}_2\text{O}$ , pH 7.4, at variable temperature. A) Spectrum was collected in 3 min using 128 transients and 0.4 s delay time at 37 °C. Insert B shows diamagnetic region complicated by the resonances of serum albumin. C) Spectra were collected at 30 and 60 °C, and the dotted grid line demonstrates a temperature dependent shift of the  $\alpha\text{-CH}_3$  resonance. Each spectrum (C) was collected in 12 s using 128 transients and 40 ms delay time. Insert D shows a temperature dependence of  $\alpha\text{-CH}_3$  resonance. Solid line represents a linear fit with  $\text{CT} = 0.23 \text{ ppm}/^\circ\text{C}$ .

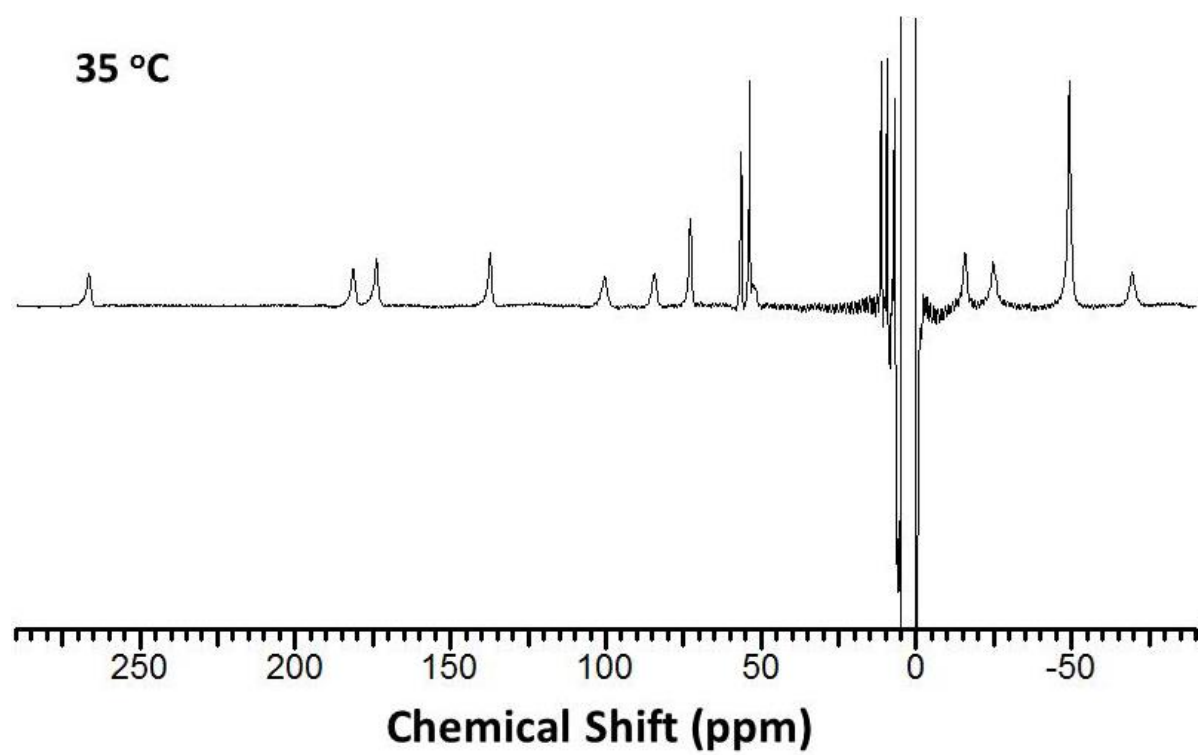

**Figure S41.**  $^1\text{H}$  NMR spectra of 10 mM  $[\text{Fe}(\text{TMPC})]^{2+}$  in serum albumin (35 mg/mL) in  $\text{D}_2\text{O}$ , pH 7.4, collected in 4 s using 128 transients and 10 ms delay time at 35 °C.

## Appendix 1. $^1\text{H}$ and $^{13}\text{C}$ NMR spectra of TMPC, MPT and TPC ligands

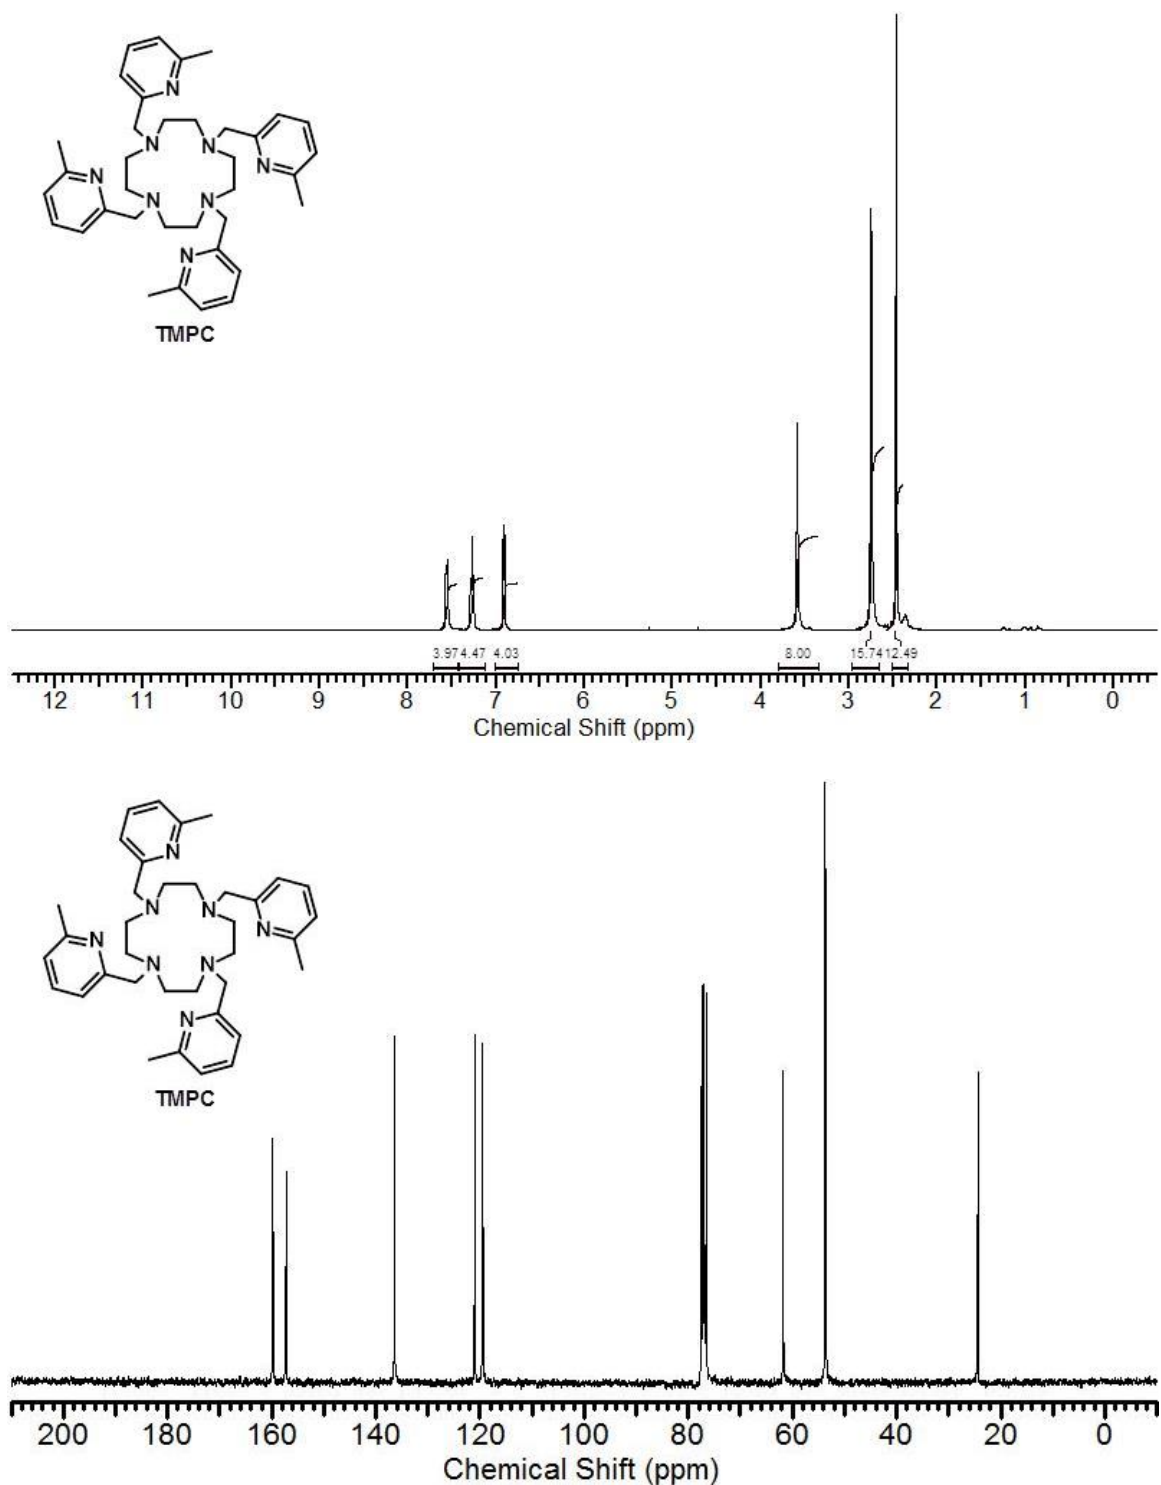

**Figure S42.**  $^1\text{H}$  and  $^{13}\text{C}$  NMR spectra of TMPC ligand in chloroform-*d*.

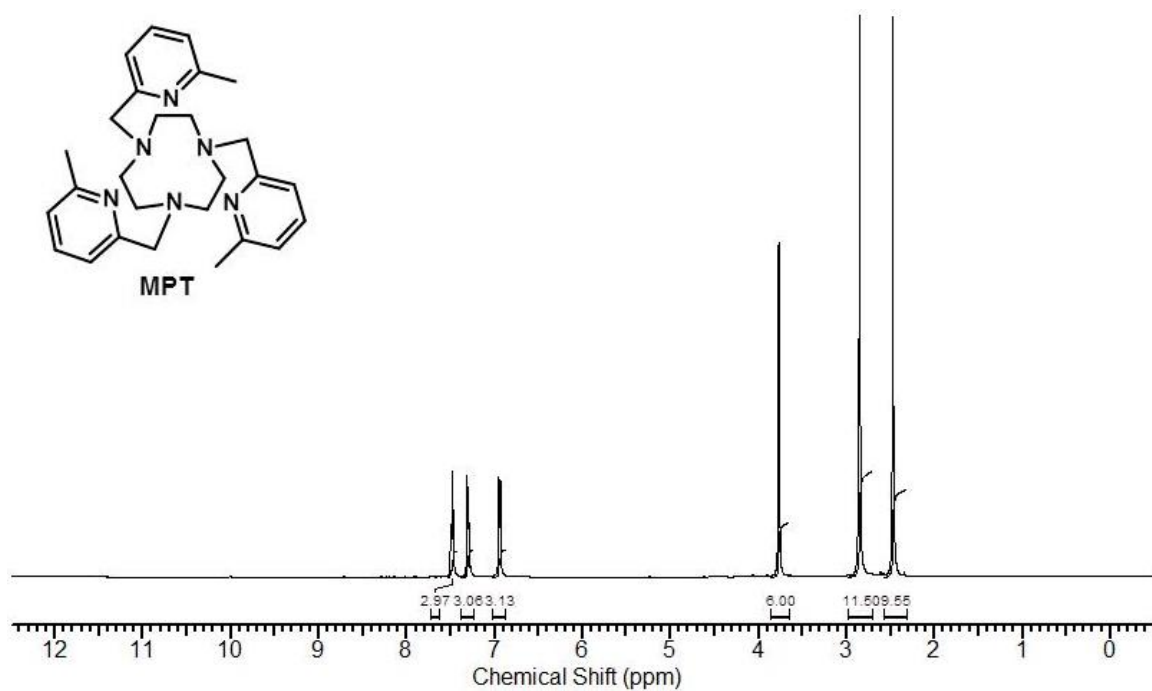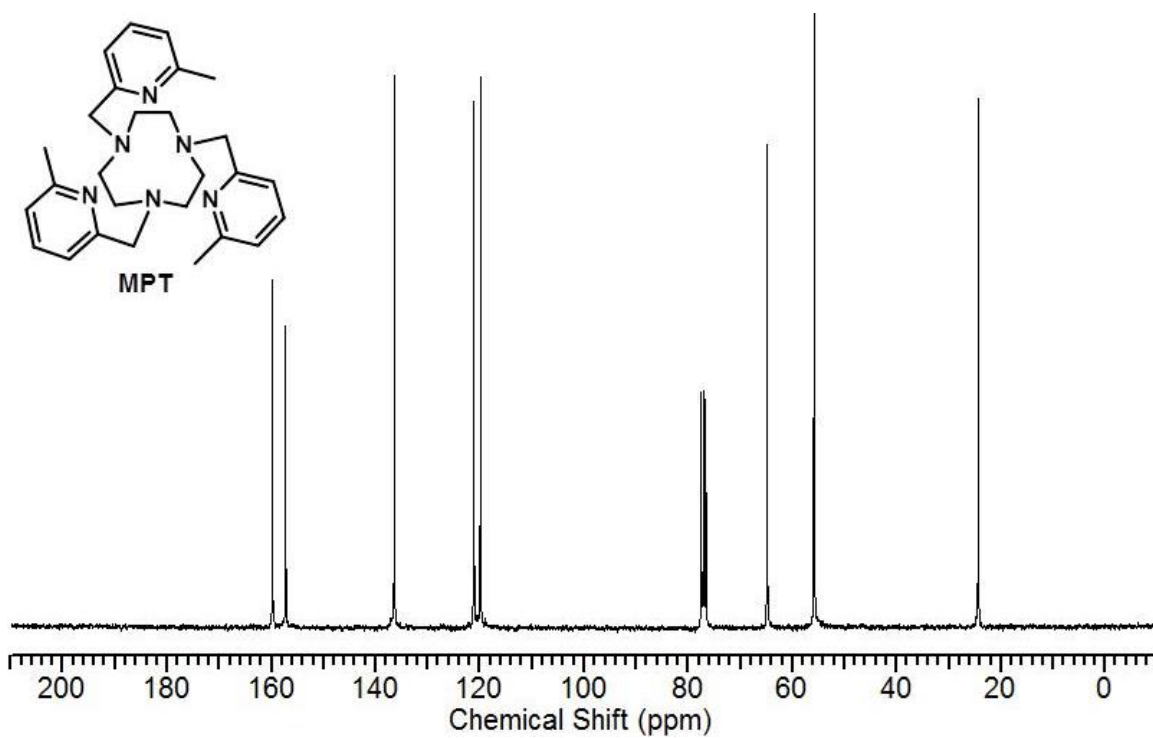

**Figure S43.**  $^1\text{H}$  and  $^{13}\text{C}$  NMR spectra of MPT ligand (free base) in chloroform-*d*.

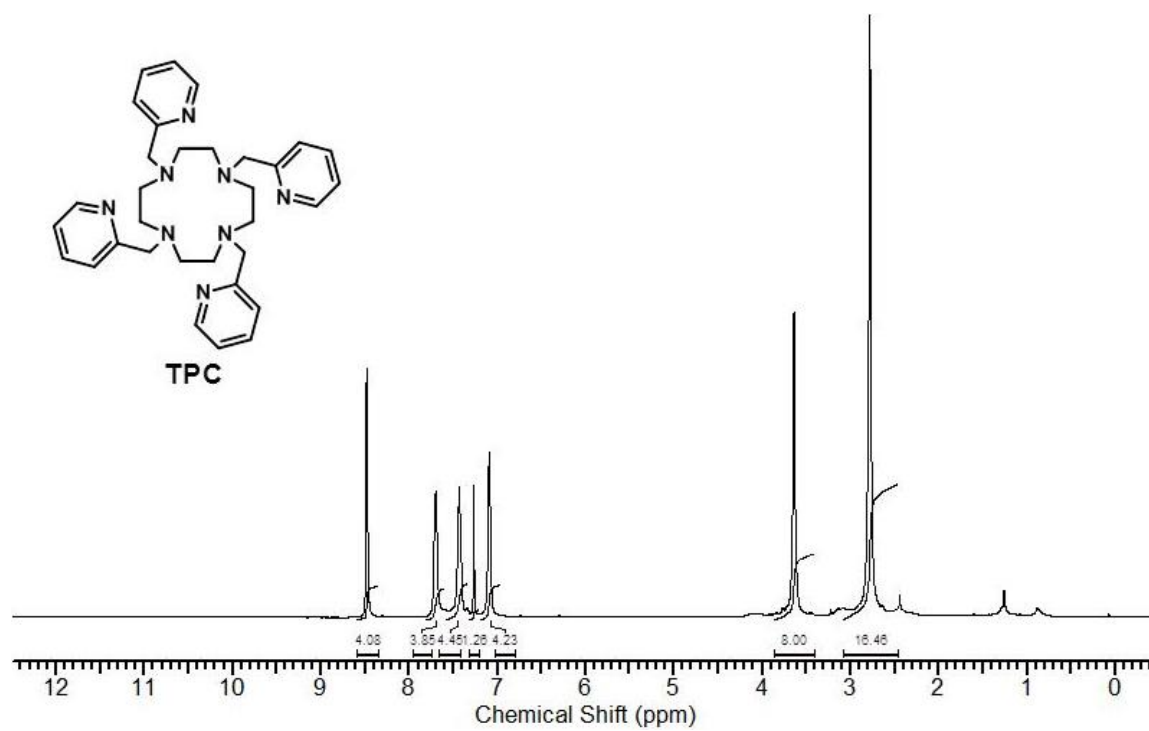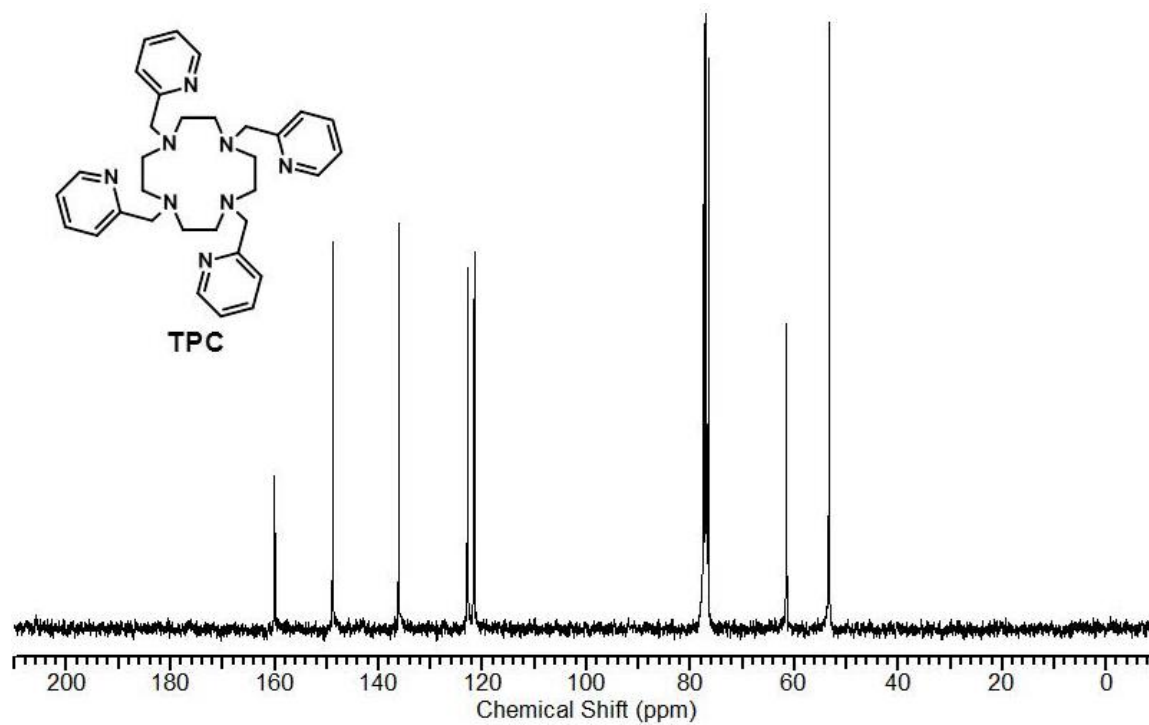

**Figure S44.** <sup>1</sup>H and <sup>13</sup>C NMR spectra of TPC ligand in chloroform-*d*.

## Appendix 2. X-ray diffraction data

### Fe(MPT)

**Table S7.** Crystal data and structure refinement for Fe(MPT).

|                                             |                                                                                                                            |
|---------------------------------------------|----------------------------------------------------------------------------------------------------------------------------|
| Identification code                         | Fe(MPT)                                                                                                                    |
| Empirical formula                           | C <sub>29.5</sub> H <sub>36.5</sub> F <sub>7.5</sub> FeN <sub>6</sub> Na <sub>0.5</sub> O <sub>7.75</sub> S <sub>2.5</sub> |
| Formula weight                              | 889.14                                                                                                                     |
| Temperature/K                               | 90                                                                                                                         |
| Crystal system                              | monoclinic                                                                                                                 |
| Space group                                 | P2 <sub>1</sub>                                                                                                            |
| a/Å                                         | 14.0975(17)                                                                                                                |
| b/Å                                         | 13.7505(16)                                                                                                                |
| c/Å                                         | 37.868(4)                                                                                                                  |
| α/°                                         | 90.00                                                                                                                      |
| β/°                                         | 96.079(4)                                                                                                                  |
| γ/°                                         | 90.00                                                                                                                      |
| Volume/Å <sup>3</sup>                       | 7299.3(15)                                                                                                                 |
| Z                                           | 8                                                                                                                          |
| ρ <sub>calc</sub> /g/cm <sup>3</sup>        | 1.618                                                                                                                      |
| μ/mm <sup>-1</sup>                          | 0.657                                                                                                                      |
| F(000)                                      | 3652.0                                                                                                                     |
| Crystal size/mm <sup>3</sup>                | 0.22 × 0.2 × 0.2                                                                                                           |
| Radiation                                   | MoKα (λ = 0.71073)                                                                                                         |
| 2θ range for data collection/°              | 3.16 to 59.22                                                                                                              |
| Index ranges                                | -19 ≤ h ≤ 19, -19 ≤ k ≤ 19, -52 ≤ l ≤ 52                                                                                   |
| Reflections collected                       | 160296                                                                                                                     |
| Independent reflections                     | 40994 [R <sub>int</sub> = 0.0510, R <sub>sigma</sub> = 0.0515]                                                             |
| Data/restraints/parameters                  | 40994/1/1987                                                                                                               |
| Goodness-of-fit on F <sup>2</sup>           | 1.036                                                                                                                      |
| Final R indexes [I ≥ 2σ (I)]                | R <sub>1</sub> = 0.0537, wR <sub>2</sub> = 0.1358                                                                          |
| Final R indexes [all data]                  | R <sub>1</sub> = 0.0662, wR <sub>2</sub> = 0.1446                                                                          |
| Largest diff. peak/hole / e Å <sup>-3</sup> | 1.57/-1.01                                                                                                                 |
| Flack parameter                             | 0.449(8)                                                                                                                   |

**Table S8.** Fractional Atomic Coordinates ( $\times 10^4$ ) and Equivalent Isotropic Displacement Parameters ( $\text{\AA}^2 \times 10^3$ ) for Fe(MPT).  $U_{\text{eq}}$  is defined as 1/3 of the trace of the orthogonalised  $U_{\text{ij}}$  tensor.

| Atom | x          | y         | z           | U(eq)    |
|------|------------|-----------|-------------|----------|
| Fe1  | 2627.0(3)  | 4824.0(3) | 2674.08(12) | 13.80(9) |
| N1   | 1595(2)    | 5517(2)   | 3002.1(7)   | 17.9(6)  |
| N2   | 1251(2)    | 4260(2)   | 2417.8(8)   | 18.2(6)  |
| N3   | 2498.1(19) | 6309(2)   | 2446.6(8)   | 16.7(5)  |
| N4   | 3623.5(19) | 4776(2)   | 2250.3(7)   | 14.6(5)  |
| N5   | 3604(2)    | 5631(2)   | 3063.3(7)   | 17.3(5)  |
| N6   | 3160(2)    | 3665(2)   | 3056.9(8)   | 19.1(6)  |
| C1   | 772(2)     | 4861(3)   | 2980.9(9)   | 21.0(7)  |
| C2   | 511(2)     | 4521(3)   | 2603.0(9)   | 18.6(6)  |
| C3   | -421(3)    | 4460(3)   | 2460.7(10)  | 23.9(7)  |
| C4   | -632(3)    | 4079(3)   | 2117.4(11)  | 28.1(8)  |
| C5   | 110(3)     | 3752(3)   | 1941.7(10)  | 25.2(8)  |
| C6   | 1052(3)    | 3849(3)   | 2095.8(9)   | 19.5(6)  |
| C7   | 1853(3)    | 3493(3)   | 1900.1(10)  | 22.5(7)  |
| C8   | 1295(3)    | 6508(3)   | 2865.9(9)   | 20.8(7)  |
| C9   | 1521(2)    | 6641(3)   | 2483.9(10)  | 20.6(7)  |
| C10  | 2648(2)    | 6186(3)   | 2068.9(8)   | 18.0(6)  |
| C11  | 3501(2)    | 5559(2)   | 2030.8(9)   | 16.3(6)  |
| C12  | 4099(2)    | 5768(3)   | 1776.1(9)   | 18.4(6)  |
| C13  | 4880(3)    | 5166(3)   | 1744.6(9)   | 22.8(7)  |
| C14  | 4996(2)    | 4360(3)   | 1963.3(9)   | 19.6(7)  |
| C15  | 4361(2)    | 4168(2)   | 2205.8(9)   | 16.0(6)  |
| C16  | 4447(3)    | 3254(3)   | 2425.3(9)   | 20.7(7)  |
| C17  | 3225(3)    | 6977(3)   | 2634.6(10)  | 21.9(7)  |
| C18  | 4007(2)    | 6421(3)   | 2858.9(9)   | 19.3(7)  |
| C19  | 4348(2)    | 4936(3)   | 3197.3(9)   | 21.9(7)  |
| C20  | 3936(3)    | 3958(3)   | 3271.9(9)   | 21.1(7)  |
| C21  | 4408(3)    | 3374(3)   | 3531(1)     | 29.8(8)  |
| C22  | 4078(3)    | 2433(4)   | 3573.0(12)  | 36.3(10) |
| C23  | 3295(3)    | 2123(3)   | 3354.0(12)  | 34.5(9)  |
| C24  | 2839(3)    | 2741(3)   | 3101.2(10)  | 23.0(7)  |
| C25  | 1988(3)    | 2399(3)   | 2861.3(11)  | 26.9(8)  |
| C26  | 3080(3)    | 6028(3)   | 3353.3(9)   | 22.4(7)  |
| C27  | 2100(2)    | 5558(3)   | 3366.3(9)   | 21.2(7)  |

|     |           |           |             |          |
|-----|-----------|-----------|-------------|----------|
| Fe3 | 2717.3(3) | 3899.9(3) | 7731.67(12) | 15.28(9) |
| N13 | 3543(2)   | 3348(2)   | 8216.5(8)   | 23.5(6)  |
| N14 | 3061(2)   | 5250(2)   | 8086.4(8)   | 21.7(6)  |
| N15 | 3027(2)   | 2375(2)   | 7576.6(8)   | 20.5(6)  |
| N16 | 3743(2)   | 4032(2)   | 7310.3(7)   | 16.3(5)  |
| N17 | 1632(2)   | 3041(2)   | 7989.3(8)   | 21.5(6)  |
| N18 | 1339(2)   | 4389(2)   | 7445.9(8)   | 18.7(6)  |
| C55 | 4281(3)   | 4085(3)   | 8316.9(10)  | 24.5(7)  |
| C56 | 3850(3)   | 5081(3)   | 8309.7(10)  | 25.4(8)  |
| C57 | 4294(3)   | 5797(4)   | 8525.6(12)  | 37(1)    |
| C58 | 3910(4)   | 6717(4)   | 8514.9(15)  | 50.6(14) |
| C59 | 3079(4)   | 6899(3)   | 8293.0(13)  | 39.5(11) |
| C60 | 2668(3)   | 6158(3)   | 8081.9(10)  | 26.4(8)  |
| C61 | 1785(3)   | 6360(3)   | 7845.1(12)  | 29.6(9)  |
| C62 | 3981(3)   | 2390(3)   | 8165.3(10)  | 26.4(8)  |
| C63 | 3985(3)   | 2161(3)   | 7773.9(10)  | 25.2(8)  |
| C64 | 3069(3)   | 2409(3)   | 7189.2(9)   | 21.7(7)  |
| C65 | 3685(2)   | 3246(2)   | 7094.8(9)   | 15.8(6)  |
| C66 | 4174(3)   | 3175(3)   | 6796.9(9)   | 19.6(7)  |
| C67 | 4772(3)   | 3916(3)   | 6721.9(9)   | 22.7(7)  |
| C68 | 4858(2)   | 4717(3)   | 6946.9(9)   | 20.2(7)  |
| C69 | 4331(2)   | 4764(3)   | 7235.9(9)   | 17.2(6)  |
| C70 | 4400(3)   | 5643(3)   | 7471.4(10)  | 22.6(7)  |
| C71 | 2304(3)   | 1663(3)   | 7669.4(11)  | 25.6(8)  |
| C72 | 1400(3)   | 2191(3)   | 7746.7(11)  | 25.5(8)  |
| C73 | 804(3)    | 3692(3)   | 7983.9(10)  | 26.1(8)  |
| C74 | 585(3)    | 4148(3)   | 7622.3(10)  | 22.7(7)  |
| C75 | -356(3)   | 4320(3)   | 7487.7(11)  | 27.8(8)  |
| C76 | -547(3)   | 4766(3)   | 7161.2(12)  | 31.4(8)  |
| C77 | 217(3)    | 5045(3)   | 6979.3(11)  | 28.2(8)  |
| C78 | 1150(3)   | 4849(3)   | 7126.9(10)  | 21.9(7)  |
| C79 | 1968(3)   | 5146(3)   | 6930.5(10)  | 24.6(7)  |
| C80 | 1973(3)   | 2734(3)   | 8353.7(10)  | 27.3(8)  |
| C81 | 2850(3)   | 3293(3)   | 8488.2(10)  | 27.8(8)  |
| Fe2 | 2123.3(3) | 2858.3(3) | 136.61(12)  | 14.47(9) |
| N7  | 3441(2)   | 2423(2)   | -103.9(8)   | 19.3(6)  |
| N8  | 2619(2)   | 4270(2)   | -69.8(7)    | 16.8(5)  |
| N9  | 1517(2)   | 2311(2)   | -387.3(8)   | 22.0(6)  |



|     |           |           |             |           |
|-----|-----------|-----------|-------------|-----------|
| N10 | 559(2)    | 3069(2)   | 159.5(8)    | 19.2(6)   |
| N11 | 2170(2)   | 1258(2)   | 231.4(8)    | 20.9(6)   |
| N12 | 2732(2)   | 2762(2)   | 697.6(7)    | 18.4(6)   |
| C28 | 4058(3)   | 3298(3)   | -60.2(10)   | 22.2(7)   |
| C29 | 3495(3)   | 4184(3)   | -184.8(9)   | 20.9(7)   |
| C30 | 3866(3)   | 4876(3)   | -396.5(11)  | 29.8(8)   |
| C31 | 3334(4)   | 5690(3)   | -490.3(13)  | 38.3(11)  |
| C32 | 2464(3)   | 5803(3)   | -367.6(11)  | 28.6(8)   |
| C33 | 2117(3)   | 5086(2)   | -153.1(9)   | 18.7(6)   |
| C34 | 1181(3)   | 5234(3)   | -3.6(10)    | 23.8(7)   |
| C35 | 3209(3)   | 2161(3)   | -487.5(10)  | 25.9(8)   |
| C36 | 2242(3)   | 2518(3)   | -636.9(9)   | 24.1(7)   |
| C37 | 644(3)    | 2898(3)   | -476.2(9)   | 25.2(7)   |
| C38 | 67(3)     | 2963(3)   | -164.5(10)  | 22.7(7)   |
| C39 | -914(3)   | 2995(3)   | -220.2(11)  | 27.8(8)   |
| C40 | -1422(3)  | 3161(3)   | 67.8(13)    | 33.2(9)   |
| C41 | -935(3)   | 3290(3)   | 398.7(12)   | 29.1(8)   |
| C42 | 66(3)     | 3228(3)   | 439.4(10)   | 22.3(7)   |
| C43 | 596(3)    | 3373(3)   | 800.7(11)   | 31.6(9)   |
| C44 | 1297(3)   | 1249(3)   | -371.2(10)  | 28.3(8)   |
| C45 | 1313(3)   | 885(3)    | 8.1(10)     | 26.0(8)   |
| C46 | 2067(3)   | 1132(3)   | 611.4(10)   | 24.1(7)   |
| C47 | 2667(3)   | 1848(3)   | 833.8(9)    | 21.3(7)   |
| C48 | 3056(3)   | 1597(3)   | 1170.6(10)  | 28.7(8)   |
| C49 | 3505(3)   | 2327(4)   | 1381.9(11)  | 36.3(10)  |
| C50 | 3544(3)   | 3252(4)   | 1254.1(11)  | 37(1)     |
| C51 | 3157(3)   | 3468(3)   | 906.9(9)    | 21.8(7)   |
| C52 | 3212(3)   | 4475(3)   | 768.7(10)   | 27.7(8)   |
| C53 | 3071(3)   | 821(3)    | 132.4(11)   | 26.3(8)   |
| C54 | 3842(3)   | 1586(3)   | 107.0(11)   | 25.0(7)   |
| Fe4 | 2344.3(4) | 6141.2(3) | 5056.14(12) | 17.29(10) |
| N19 | 2379(2)   | 7747(2)   | 5103.9(7)   | 20.9(6)   |
| N20 | 2804(2)   | 6349(2)   | 5629.1(7)   | 18.7(6)   |
| N21 | 1885(2)   | 6590(2)   | 4497.1(8)   | 21.8(6)   |
| N22 | 778(2)    | 5976(2)   | 5018.3(8)   | 19.4(6)   |
| N23 | 3726(2)   | 6473(2)   | 4850.9(8)   | 22.0(6)   |
| N24 | 2817(2)   | 4662(2)   | 4915.8(7)   | 19.3(6)   |
| C82 | 2166(3)   | 7963(2)   | 5470.3(9)   | 21.3(7)   |

|      |            |            |            |           |
|------|------------|------------|------------|-----------|
| C83  | 2700(3)    | 7280(3)    | 5732.4(9)  | 20.7(7)   |
| C84  | 2995(3)    | 7613(3)    | 6072.0(9)  | 23.3(7)   |
| C85  | 3391(3)    | 6950(3)    | 6320.1(9)  | 26.5(8)   |
| C86  | 3469(3)    | 5993(3)    | 6220.5(9)  | 25.2(8)   |
| C87  | 3189(3)    | 5706(3)    | 5874.1(9)  | 19.4(6)   |
| C88  | 3285(3)    | 4661(3)    | 5769.7(10) | 23.2(7)   |
| C89  | 1613(3)    | 8106(2)    | 4841.4(9)  | 24.9(8)   |
| C90  | 1708(3)    | 7658(3)    | 4478.3(10) | 28.5(8)   |
| C91  | 1018(3)    | 6028(3)    | 4390.3(9)  | 26.6(8)   |
| C92  | 365(3)     | 6013(2)    | 4678.5(9)  | 21.6(7)   |
| C93  | -608(3)    | 5981(3)    | 4591.4(10) | 26.7(8)   |
| C94  | -1197(3)   | 5902(3)    | 4864.3(12) | 34.8(9)   |
| C95  | -771(3)    | 5848(3)    | 5210.7(11) | 26.7(8)   |
| C96  | 211(3)     | 5882(2)    | 5281.0(9)  | 21.2(7)   |
| C97  | 649(3)     | 5775(3)    | 5656.6(9)  | 23.0(7)   |
| C98  | 2664(3)    | 6320(3)    | 4282.7(10) | 27.7(8)   |
| C99  | 3631(3)    | 6668(3)    | 4457.7(10) | 27.8(8)   |
| C100 | 4295(3)    | 5583(3)    | 4933.6(10) | 25.2(7)   |
| C101 | 3709(3)    | 4707(3)    | 4806.8(9)  | 21.6(7)   |
| C102 | 4067(3)    | 3986(3)    | 4601.6(10) | 27.1(8)   |
| C103 | 3502(3)    | 3185(3)    | 4509.1(11) | 30.9(9)   |
| C104 | 2606(3)    | 3114(3)    | 4631.8(11) | 27.8(8)   |
| C105 | 2289(3)    | 3856(3)    | 4837.1(9)  | 19.9(6)   |
| C106 | 1351(3)    | 3755(3)    | 4983.7(10) | 22.1(7)   |
| C107 | 4097(3)    | 7325(3)    | 5057.8(10) | 26.6(8)   |
| C108 | 3335(3)    | 8123(3)    | 5043(1)    | 27.7(8)   |
| S1   | 6854.3(6)  | 4310.9(6)  | 7977.6(2)  | 21.28(17) |
| S2   | 6217.2(7)  | 3208.4(7)  | 9115.9(3)  | 25.06(18) |
| S3   | 8767.2(7)  | 1082.2(7)  | 8840.8(2)  | 26.87(19) |
| S4   | 10109.3(8) | 4989.0(9)  | 8885.3(3)  | 33.8(2)   |
| Na1  | 7954.5(10) | 3606.5(10) | 8680.9(4)  | 19.9(3)   |
| F1   | 6578.2(19) | 6075.7(19) | 7723.6(9)  | 47.5(7)   |
| F2   | 8049.2(18) | 5716.2(19) | 7861.4(8)  | 41.1(6)   |
| F3   | 7307(2)    | 5111(2)    | 7391.1(7)  | 46.1(7)   |
| F4   | 6281.5(19) | 2540(2)    | 9765.2(7)  | 43.5(7)   |
| F5   | 7107.9(17) | 1708.0(18) | 9425.0(7)  | 35.5(6)   |
| F6   | 5571.3(19) | 1591(2)    | 9366.8(10) | 52.0(8)   |
| F7   | 10532(2)   | 1611(3)    | 8780.9(7)  | 56.2(9)   |

|      |            |            |            |           |
|------|------------|------------|------------|-----------|
| F8   | 10281(2)   | 90(3)      | 8709.4(8)  | 52.8(8)   |
| F9   | 9767(2)    | 1100(2)    | 8292.7(6)  | 43.1(7)   |
| F10  | 9151(2)    | 6498(2)    | 8628.1(8)  | 48.4(7)   |
| F11  | 9916(2)    | 5742(3)    | 8248.6(8)  | 57.0(9)   |
| F12  | 10658(3)   | 6641(3)    | 8624.2(13) | 79.5(13)  |
| O1   | 7666(2)    | 3662(2)    | 7983.7(8)  | 26.8(6)   |
| O2   | 5998.9(19) | 3979(2)    | 7769.3(7)  | 25.4(5)   |
| O3   | 6726(2)    | 4715(2)    | 8318.6(8)  | 31.9(6)   |
| O4   | 7083(2)    | 3751(2)    | 9213.5(8)  | 35.2(7)   |
| O5   | 6208(2)    | 2745(2)    | 8775.3(8)  | 32.0(6)   |
| O6   | 5348(2)    | 3691(3)    | 9182.1(8)  | 41.1(8)   |
| O7   | 8210(2)    | 308(3)     | 8671.3(7)  | 37.8(8)   |
| O8   | 9052(2)    | 947(3)     | 9212.6(7)  | 36.5(7)   |
| O9   | 8477(3)    | 2041(3)    | 8736.7(11) | 54.8(10)  |
| O10  | 11006(2)   | 4589(3)    | 8829.4(9)  | 45.6(9)   |
| O11  | 10113(3)   | 5483(5)    | 9227.6(10) | 79.0(17)  |
| O12  | 9289(4)    | 4446(4)    | 8786.2(16) | 89.8(19)  |
| C109 | 7218(3)    | 5356(3)    | 7723.6(12) | 29.9(8)   |
| C110 | 6300(3)    | 2209(3)    | 9434.5(13) | 32.0(9)   |
| C111 | 9887(3)    | 982(4)     | 8643.4(10) | 34.8(10)  |
| C112 | 9942(4)    | 6037(4)    | 8590.6(13) | 41.2(11)  |
| S5   | 6936.1(6)  | 4460.4(6)  | 2957.3(2)  | 17.14(15) |
| S6   | 9579.7(7)  | 7381.5(7)  | 3527.5(2)  | 24.86(18) |
| S7   | 6375.8(6)  | 5778.1(6)  | 4032.0(2)  | 20.91(17) |
| S8   | 10036.0(7) | 3509.7(7)  | 3926.7(3)  | 27.3(2)   |
| Na2  | 8139(1)    | 5211.9(10) | 3637.3(3)  | 19.6(3)   |
| F13  | 7415.0(19) | 3547(2)    | 2393.6(7)  | 37.1(6)   |
| F14  | 6572.8(18) | 2690.8(17) | 2723.4(8)  | 38.7(6)   |
| F15  | 8049.4(18) | 2954.6(19) | 2893.0(8)  | 38.0(6)   |
| F16  | 9258(3)    | 9163(2)    | 3727.5(8)  | 57.7(9)   |
| F17  | 8051(2)    | 8242(3)    | 3702.9(8)  | 54.5(9)   |
| F18  | 9172(2)    | 8093(2)    | 4134.9(6)  | 39.7(6)   |
| F19  | 7259.1(17) | 7316.1(17) | 4319.4(7)  | 33.2(5)   |
| F20  | 5737.0(19) | 7474.4(19) | 4213.8(9)  | 44.8(7)   |
| F21  | 6330(2)    | 6609(2)    | 4654.3(7)  | 43.0(7)   |
| F22  | 9918.3(19) | 2883(2)    | 3266.6(6)  | 37.6(6)   |
| F23  | 9157.5(19) | 2019(2)    | 3612.2(6)  | 37.1(6)   |
| F24  | 10678(2)   | 1931(2)    | 3640.4(9)  | 51.9(8)   |

|      |            |            |            |          |
|------|------------|------------|------------|----------|
| O13  | 7817.1(18) | 5016.0(19) | 2995.0(7)  | 22.9(5)  |
| O14  | 6184.5(18) | 4871(2)    | 2717.9(6)  | 22.0(5)  |
| O15  | 6666(2)    | 4101(2)    | 3289.2(7)  | 27.6(6)  |
| O16  | 9260(2)    | 7634(2)    | 3166.2(7)  | 28.2(6)  |
| O17  | 10569(2)   | 7530(3)    | 3637.2(8)  | 46.1(9)  |
| O18  | 9223(3)    | 6479(2)    | 3650.4(9)  | 44.9(9)  |
| O19  | 6446(2)    | 6178(2)    | 3683.3(8)  | 32.3(6)  |
| O20  | 7210(2)    | 5224(2)    | 4167.7(8)  | 31.4(6)  |
| O21  | 5470(2)    | 5341(2)    | 4086.7(8)  | 31.3(6)  |
| O22  | 10879(3)   | 4040(3)    | 3852.5(9)  | 45.2(9)  |
| O23  | 10113(3)   | 3001(3)    | 4258.8(8)  | 43.0(8)  |
| O24  | 9155(3)    | 4034(3)    | 3836.2(11) | 50.7(9)  |
| C113 | 7265(3)    | 3356(3)    | 2734.2(11) | 27.1(8)  |
| C114 | 8991(3)    | 8265(3)    | 3788.7(10) | 31.5(9)  |
| C115 | 6429(3)    | 6851(3)    | 4317.8(11) | 26.4(8)  |
| C116 | 9952(3)    | 2551(3)    | 3592.9(10) | 26.7(8)  |
| S9   | 6065.0(9)  | 4992.5(8)  | 5879.4(3)  | 37.9(2)  |
| F25  | 7463(2)    | 6235(2)    | 5883.4(8)  | 43.8(6)  |
| F26  | 7873(2)    | 4751(2)    | 5807.7(11) | 60.0(9)  |
| F27  | 7070(2)    | 5536(3)    | 5377.4(8)  | 55.1(8)  |
| O25  | 6320(3)    | 4878(3)    | 6263.2(10) | 51.0(9)  |
| O26  | 5445(2)    | 5793(3)    | 5785.8(9)  | 40.1(7)  |
| O27  | 5871(3)    | 4110(3)    | 5688.9(11) | 50.7(10) |
| O31  | 7643(4)    | 3391(4)    | 6600.6(15) | 79.5(16) |
| C117 | 7167(4)    | 5409(4)    | 5727.9(14) | 41.1(11) |
| S10  | 7105.0(9)  | 4720(1)    | 1144.1(3)  | 43.1(3)  |
| F28  | 5893(4)    | 4631(3)    | 564.4(11)  | 93.0(16) |
| F29  | 6400(3)    | 3266(3)    | 756.1(12)  | 83.1(13) |
| F30  | 5376(3)    | 3990(4)    | 1009.9(12) | 87.2(14) |
| O28  | 7859(3)    | 4747(4)    | 919.8(15)  | 78.6(15) |
| O29  | 6696(4)    | 5669(3)    | 1193.8(13) | 68.2(12) |
| O30  | 7134(5)    | 4140(3)    | 1450.3(12) | 86.1(18) |
| C118 | 6235(4)    | 4092(4)    | 814(2)     | 67(2)    |

**Table S9.** Anisotropic Displacement Parameters ( $\text{\AA}^2 \times 10^3$ ) for Fe(MPT). The Anisotropic displacement factor exponent takes the form:  $-2\pi^2[h^2a^*^2U_{11}+2hka^*b^*U_{12}+\dots]$ .

| Atom | $U_{11}$ | $U_{22}$ | $U_{33}$  | $U_{23}$  | $U_{13}$ | $U_{12}$  |
|------|----------|----------|-----------|-----------|----------|-----------|
| Fe1  | 15.5(2)  | 13.5(2)  | 12.50(19) | -0.53(16) | 1.83(16) | -0.73(17) |
| N1   | 18.8(14) | 20.2(14) | 14.8(13)  | -4.3(10)  | 2.3(10)  | -0.8(11)  |
| N2   | 17.3(13) | 18.0(13) | 19.3(13)  | -1.6(11)  | 2.7(11)  | -4.1(11)  |
| N3   | 14.8(13) | 14.5(13) | 20.7(13)  | -0.4(10)  | 1.7(10)  | 1.4(10)   |
| N4   | 16.4(12) | 13.7(12) | 13.7(12)  | -0.1(10)  | 0.8(9)   | -0.5(10)  |
| N5   | 17.7(13) | 19.9(14) | 14.2(12)  | 1.1(10)   | 0.9(10)  | -1.7(11)  |
| N6   | 19.2(14) | 21.3(14) | 17.5(13)  | 2.1(11)   | 5.6(11)  | 1.6(11)   |
| C1   | 18.9(15) | 28.5(18) | 16.8(15)  | -2.8(14)  | 7.1(12)  | -4.0(14)  |
| C2   | 19.8(16) | 19.1(15) | 17.6(15)  | -2.0(12)  | 5.7(12)  | -2.9(13)  |
| C3   | 19.6(16) | 24.1(17) | 28.6(18)  | -3.6(15)  | 5.8(14)  | -3.4(14)  |
| C4   | 20.1(17) | 34(2)    | 28.9(19)  | -3.8(16)  | -1.4(14) | -6.5(15)  |
| C5   | 25.6(18) | 31(2)    | 18.7(16)  | -3.4(14)  | 0.1(13)  | -8.3(15)  |
| C6   | 23.3(17) | 17.6(15) | 18.2(15)  | -2.2(13)  | 4.8(12)  | -4.5(13)  |
| C7   | 24.4(17) | 22.9(17) | 20.6(16)  | -8.0(14)  | 4.3(13)  | -2.9(14)  |
| C8   | 20.5(16) | 18.7(16) | 23.2(17)  | -7.9(13)  | 2.4(13)  | 2.1(13)   |
| C9   | 19.7(16) | 16.8(15) | 25.4(17)  | 0.7(13)   | 1.9(13)  | 4.1(13)   |
| C10  | 20.3(15) | 17.4(15) | 16.0(14)  | 2.8(12)   | 0.9(12)  | 2.8(13)   |
| C11  | 17.0(15) | 16.3(15) | 14.8(14)  | -0.1(11)  | -1.9(12) | -3.2(12)  |
| C12  | 23.2(16) | 17.4(15) | 14.6(14)  | 0.4(12)   | 2.6(12)  | -4.9(13)  |
| C13  | 25.8(18) | 27.0(18) | 16.4(15)  | -3.2(13)  | 5.3(13)  | -8.7(14)  |
| C14  | 20.9(16) | 18.8(16) | 19.4(15)  | -6.1(13)  | 3.6(13)  | -2.7(13)  |
| C15  | 15.5(14) | 15.8(14) | 16.0(14)  | -2.5(11)  | -1.3(11) | -1.0(11)  |
| C16  | 23.8(17) | 17.6(15) | 20.5(16)  | -0.9(13)  | 1.2(13)  | 4.3(13)   |
| C17  | 20.7(16) | 17.5(16) | 26.9(18)  | -1.1(13)  | 0.0(13)  | -3.7(13)  |
| C18  | 18.3(16) | 18.2(16) | 20.9(16)  | -2.4(12)  | 0.1(12)  | -5.1(12)  |
| C19  | 19.6(16) | 28.2(18) | 17.5(15)  | 1.1(14)   | -0.5(12) | -2.5(14)  |
| C20  | 20.0(16) | 27.7(18) | 16.3(15)  | 4.4(13)   | 5.2(12)  | 5.5(14)   |
| C21  | 29(2)    | 40(2)    | 20.6(17)  | 9.0(16)   | 2.0(15)  | 3.9(17)   |
| C22  | 37(2)    | 41(2)    | 31(2)     | 17.4(19)  | 1.1(17)  | 5.8(19)   |
| C23  | 40(2)    | 28(2)    | 37(2)     | 15.2(17)  | 11.7(18) | 3.8(18)   |
| C24  | 27.0(18) | 19.3(16) | 24.2(17)  | 3.9(13)   | 9.9(14)  | 0.9(14)   |
| C25  | 29.9(19) | 18.7(17) | 33(2)     | 4.1(15)   | 5.6(15)  | -3.5(15)  |
| C26  | 26.7(17) | 23.3(17) | 16.8(15)  | -7.7(13)  | 0.5(13)  | -1.8(14)  |
| C27  | 20.3(16) | 28.5(18) | 14.9(15)  | -5.2(13)  | 2.7(12)  | -1.8(14)  |
| Fe3  | 17.2(2)  | 13.0(2)  | 16.2(2)   | -1.19(17) | 4.43(17) | -0.01(17) |

|     |          |          |          |           |          |           |
|-----|----------|----------|----------|-----------|----------|-----------|
| N13 | 29.0(16) | 20.8(15) | 20.3(14) | 1.7(11)   | 0.7(12)  | 1.4(12)   |
| N14 | 23.5(15) | 20.8(14) | 22.2(14) | -3.8(12)  | 9.6(12)  | -3.7(12)  |
| N15 | 25.4(15) | 15.0(13) | 22.2(14) | 0.4(11)   | 7.6(12)  | -3.1(11)  |
| N16 | 14.5(12) | 17.7(13) | 16.7(12) | 0.5(10)   | 2(1)     | 1.7(10)   |
| N17 | 24.8(15) | 19.0(14) | 22.3(14) | 3.5(11)   | 9.2(12)  | -0.2(12)  |
| N18 | 18.5(14) | 15.7(13) | 22.7(14) | 0.5(11)   | 5.7(11)  | -0.1(11)  |
| C55 | 24.1(17) | 27.0(19) | 22.0(17) | -3.1(14)  | 0.9(14)  | -4.7(14)  |
| C56 | 33(2)    | 23.5(18) | 20.8(17) | -3.5(14)  | 8.5(15)  | -5.8(15)  |
| C57 | 37(2)    | 40(2)    | 34(2)    | -15.3(19) | -0.7(18) | -5.0(19)  |
| C58 | 57(3)    | 37(3)    | 56(3)    | -31(2)    | -1(3)    | -6(2)     |
| C59 | 50(3)    | 24(2)    | 47(3)    | -15.7(19) | 14(2)    | 1.5(19)   |
| C60 | 35(2)    | 18.5(16) | 27.7(18) | -4.8(14)  | 13.5(15) | -4.1(15)  |
| C61 | 35(2)    | 15.1(16) | 41(2)    | -1.7(15)  | 15.2(18) | 3.8(15)   |
| C62 | 33(2)    | 24.3(18) | 21.8(17) | 3.5(14)   | 1.2(15)  | 4.2(16)   |
| C63 | 30.4(19) | 22.4(18) | 23.6(17) | 3.6(14)   | 7.3(15)  | 7.5(15)   |
| C64 | 25.9(18) | 18.6(16) | 21.8(16) | -1.9(13)  | 8.1(13)  | -2.2(14)  |
| C65 | 15.2(14) | 14.4(14) | 17.6(15) | 1.5(11)   | 0.9(11)  | 2.3(12)   |
| C66 | 22.7(17) | 19.8(16) | 16.2(15) | -0.4(12)  | 2.1(12)  | 4.3(13)   |
| C67 | 21.2(16) | 29.1(18) | 18.5(15) | 5.7(14)   | 6.0(13)  | 2.9(14)   |
| C68 | 20.4(16) | 22.3(16) | 18.0(15) | 6.8(13)   | 2.8(12)  | -2.4(13)  |
| C69 | 15.2(14) | 15.9(14) | 20.1(15) | 4.3(12)   | 0.5(12)  | 3.7(12)   |
| C70 | 24.2(17) | 15.6(16) | 27.9(18) | -2.5(13)  | 2.1(14)  | -3.5(13)  |
| C71 | 31(2)    | 17.6(16) | 29.6(19) | 1.5(14)   | 8.5(15)  | -2.9(14)  |
| C72 | 26.2(18) | 17.8(17) | 34(2)    | -1.7(14)  | 9.1(15)  | -5.2(14)  |
| C73 | 26.4(18) | 24.9(18) | 28.4(19) | 2.2(15)   | 9.9(15)  | 1.1(15)   |
| C74 | 20.3(16) | 16.3(16) | 32.7(19) | -2.4(14)  | 9.0(14)  | 0.4(13)   |
| C75 | 21.5(18) | 23.0(18) | 40(2)    | -2.8(16)  | 7.9(16)  | 2.0(15)   |
| C76 | 23.6(18) | 30(2)    | 40(2)    | 2.9(18)   | 0.5(16)  | 7.4(16)   |
| C77 | 24.4(18) | 26.8(19) | 33(2)    | 4.2(15)   | 0.2(15)  | 9.5(15)   |
| C78 | 22.3(16) | 14.6(15) | 29.3(18) | 0.4(14)   | 5.0(14)  | 1.8(13)   |
| C79 | 24.1(18) | 25.8(18) | 24.5(17) | 7.5(14)   | 5.2(14)  | 4.3(14)   |
| C80 | 31(2)    | 29(2)    | 22.7(17) | 5.5(15)   | 6.9(15)  | -1.2(16)  |
| C81 | 37(2)    | 28.8(19) | 18.4(17) | 4.1(14)   | 9.2(15)  | 0.0(16)   |
| Fe2 | 17.3(2)  | 13.9(2)  | 12.2(2)  | -0.87(16) | 1.39(16) | -0.59(17) |
| N7  | 22.5(14) | 14.6(13) | 21.4(14) | -0.4(11)  | 6.0(11)  | 1.6(11)   |
| N8  | 20.7(14) | 13.6(12) | 16.5(13) | -0.8(10)  | 4(1)     | 1.2(11)   |
| N9  | 24.1(15) | 25.6(15) | 16.1(13) | -5.1(11)  | 1.0(11)  | -3.7(12)  |
| N10 | 18.6(14) | 18.4(14) | 20.3(14) | 3.5(11)   | 0.1(11)  | 0.4(11)   |

|     |          |          |          |           |          |           |
|-----|----------|----------|----------|-----------|----------|-----------|
| N11 | 23.2(14) | 16.9(14) | 22.5(14) | -0.7(11)  | 1.2(11)  | -0.7(11)  |
| N12 | 20.3(14) | 19.1(14) | 15.4(13) | 0.4(11)   | 1(1)     | -2.4(11)  |
| C28 | 20.3(16) | 17.9(16) | 29.0(18) | 0.6(14)   | 6.2(14)  | -1.1(13)  |
| C29 | 23.0(17) | 18.8(16) | 21.4(16) | -1.7(13)  | 5.4(13)  | -1.4(13)  |
| C30 | 26.6(18) | 23.7(18) | 42(2)    | 3.1(17)   | 19.1(16) | -2.4(16)  |
| C31 | 45(3)    | 22.0(19) | 52(3)    | 13.0(19)  | 24(2)    | 3.0(18)   |
| C32 | 39(2)    | 17.5(16) | 31(2)    | 7.2(15)   | 10.5(17) | 6.7(16)   |
| C33 | 23.0(16) | 16.5(15) | 16.8(15) | -1.8(12)  | 3.0(12)  | 3.6(12)   |
| C34 | 25.6(18) | 19.4(16) | 27.7(18) | 2.6(14)   | 7.9(14)  | 6.4(14)   |
| C35 | 37(2)    | 23.5(18) | 18.9(16) | -4.3(13)  | 12.9(15) | 3.5(15)   |
| C36 | 30.1(19) | 29.6(19) | 13.1(15) | -3.3(13)  | 4.5(13)  | -6.1(15)  |
| C37 | 26.7(18) | 30.6(19) | 16.4(15) | 0.3(14)   | -6.5(13) | -1.2(16)  |
| C38 | 21.2(17) | 20.2(16) | 26.4(17) | 3.2(14)   | 0.9(13)  | -0.5(14)  |
| C39 | 21.6(18) | 23.6(18) | 37(2)    | 4.5(16)   | -3.7(15) | -2.9(14)  |
| C40 | 20.9(18) | 23.2(19) | 55(3)    | 9.7(18)   | 3.0(17)  | -0.2(15)  |
| C41 | 25.1(19) | 21.7(18) | 42(2)    | 4.1(16)   | 10.8(16) | 0.5(15)   |
| C42 | 22.4(17) | 18.2(16) | 27.4(18) | 4.6(13)   | 7.4(14)  | 0.9(13)   |
| C43 | 34(2)    | 38(2)    | 24.2(19) | -1.1(16)  | 8.4(16)  | 6.7(18)   |
| C44 | 36(2)    | 22.9(18) | 25.2(18) | -8.0(15)  | -1.1(15) | -7.3(16)  |
| C45 | 31.1(19) | 17.8(16) | 29.0(19) | -3.6(14)  | 2.8(15)  | -10.7(14) |
| C46 | 29.1(18) | 19.7(16) | 24.1(17) | 8.2(14)   | 5.6(14)  | 0.0(15)   |
| C47 | 22.5(17) | 22.3(17) | 19.3(16) | 5.5(13)   | 2.5(13)  | 1.9(13)   |
| C48 | 31(2)    | 34(2)    | 21.2(18) | 10.5(15)  | 0.4(15)  | 0.3(16)   |
| C49 | 38(2)    | 53(3)    | 16.9(17) | 7.8(18)   | -3.0(16) | -2(2)     |
| C50 | 44(3)    | 47(3)    | 18.4(18) | -1.3(17)  | -5.1(17) | -4(2)     |
| C51 | 24.0(17) | 24.0(17) | 16.5(15) | -3.2(13)  | -1.3(13) | -2.3(14)  |
| C52 | 35(2)    | 23.6(18) | 23.8(18) | -7.9(14)  | -0.7(15) | -3.7(16)  |
| C53 | 28.8(19) | 15.0(15) | 36(2)    | 3.1(15)   | 10.8(16) | 4.4(14)   |
| C54 | 23.7(18) | 21.5(17) | 30.2(19) | 0.6(14)   | 4.7(15)  | 4.9(14)   |
| Fe4 | 25.3(2)  | 13.8(2)  | 12.4(2)  | -0.85(17) | 0.28(17) | -0.83(19) |
| N19 | 31.5(16) | 16.0(13) | 14.8(13) | -0.9(11)  | 0.3(11)  | -2.1(12)  |
| N20 | 22.5(14) | 18.5(14) | 14.8(13) | -0.5(10)  | 0.0(11)  | -2.3(11)  |
| N21 | 33.1(17) | 17.3(14) | 14.5(13) | -0.7(11)  | 0.1(12)  | 1.0(12)   |
| N22 | 25.3(15) | 13.5(13) | 18.2(13) | -1.9(10)  | -3.3(11) | -0.3(11)  |
| N23 | 30.8(16) | 18.1(14) | 17.2(14) | -1.3(11)  | 2.7(12)  | -4.2(12)  |
| N24 | 24.4(15) | 19.0(14) | 14.2(12) | -0.3(10)  | 0.2(11)  | -0.5(11)  |
| C82 | 32.4(19) | 13.9(15) | 17.1(15) | -3.2(12)  | 0.7(13)  | -1.0(14)  |
| C83 | 27.3(18) | 19.1(16) | 16.0(15) | -3.4(12)  | 3.1(13)  | -3.5(13)  |

|      |          |          |          |           |          |           |
|------|----------|----------|----------|-----------|----------|-----------|
| C84  | 28.2(18) | 22.4(17) | 19.3(16) | -6.1(13)  | 2.0(14)  | -1.2(14)  |
| C85  | 30.2(19) | 34(2)    | 14.2(15) | -4.6(14)  | -1.2(14) | 2.6(16)   |
| C86  | 30.2(19) | 31(2)    | 14.4(15) | -0.9(14)  | 0.0(13)  | 2.9(15)   |
| C87  | 21.9(16) | 17.3(15) | 19.3(15) | 0.8(12)   | 2.9(13)  | 1.6(13)   |
| C88  | 31.9(19) | 16.1(16) | 21.5(16) | 2.3(13)   | 2.3(14)  | 4.5(14)   |
| C89  | 44(2)    | 10.8(15) | 18.1(16) | 0.5(12)   | -3.4(15) | 2.5(14)   |
| C90  | 48(2)    | 19.6(18) | 16.8(16) | 1.1(13)   | -2.0(16) | -0.7(16)  |
| C91  | 36(2)    | 24.5(18) | 17.7(16) | -1.0(14)  | -3.3(14) | -2.3(16)  |
| C92  | 32.7(19) | 12.3(15) | 18.3(15) | -2.1(12)  | -4.5(13) | 1.6(13)   |
| C93  | 34(2)    | 23.8(18) | 20.1(17) | -0.4(14)  | -7.0(14) | 2.5(15)   |
| C94  | 30(2)    | 32(2)    | 40(2)    | -0.5(18)  | -7.3(18) | 2.9(17)   |
| C95  | 28.4(19) | 20.5(17) | 31.1(19) | 1.3(14)   | 2.8(15)  | 4.0(14)   |
| C96  | 31.8(19) | 11.0(14) | 19.9(16) | 0.4(12)   | -1.7(14) | 1.2(13)   |
| C97  | 27.8(18) | 20.9(16) | 20.2(16) | 0.7(13)   | 2.0(14)  | 0.2(14)   |
| C98  | 40(2)    | 27.1(19) | 16.6(16) | -1.9(14)  | 4.4(15)  | -4.3(16)  |
| C99  | 37(2)    | 27.8(19) | 19.7(17) | -2.1(14)  | 5.7(15)  | -2.3(16)  |
| C100 | 26.9(19) | 23.0(18) | 25.6(18) | -3.4(14)  | 2.8(14)  | -3.4(15)  |
| C101 | 25.2(17) | 21.8(17) | 18.1(15) | 0.3(13)   | 3.3(13)  | 1.9(14)   |
| C102 | 28.8(19) | 27.7(19) | 26.0(18) | -2.1(15)  | 9.1(15)  | 2.3(16)   |
| C103 | 33(2)    | 26.9(19) | 33(2)    | -10.5(16) | 7.0(17)  | 4.8(16)   |
| C104 | 35(2)    | 17.8(17) | 31(2)    | -7.2(14)  | 2.9(16)  | -2.3(15)  |
| C105 | 24.9(17) | 16.1(15) | 18.7(15) | -1.3(13)  | 2.2(13)  | 0.6(13)   |
| C106 | 24.8(17) | 18.3(16) | 23.2(17) | -1.7(13)  | 2.8(13)  | -3.9(13)  |
| C107 | 32(2)    | 23.3(18) | 24.8(18) | -4.5(14)  | 5.8(15)  | -7.9(15)  |
| C108 | 40(2)    | 19.7(17) | 23.6(18) | -3.5(14)  | 5.3(16)  | -10.8(16) |
| S1   | 23.4(4)  | 16.5(4)  | 24.0(4)  | -3.8(3)   | 2.7(3)   | 0.0(3)    |
| S2   | 25.8(4)  | 22.1(4)  | 26.8(4)  | -4.2(3)   | 0.2(3)   | 3.1(3)    |
| S3   | 34.0(5)  | 27.9(5)  | 18.5(4)  | 2.8(3)    | 2.2(3)   | -9.4(4)   |
| S4   | 28.0(5)  | 46.0(6)  | 26.8(5)  | 13.0(4)   | -0.2(4)  | 0.4(4)    |
| Na1  | 26.5(7)  | 18.5(6)  | 15.1(6)  | 2.9(5)    | 4.4(5)   | 3.7(5)    |
| F1   | 30.2(13) | 21.3(12) | 91(2)    | 13.5(14)  | 6.3(14)  | 6.8(10)   |
| F2   | 25.1(12) | 28.7(13) | 69.0(19) | 8.3(13)   | 2.7(12)  | -3.9(10)  |
| F3   | 45.9(16) | 55.9(18) | 37.9(15) | 15.6(13)  | 11.1(12) | -2.1(14)  |
| F4   | 33.0(14) | 60.4(19) | 38.5(14) | 12.9(13)  | 10.3(11) | 16.8(13)  |
| F5   | 25.0(12) | 27.7(12) | 54.6(16) | 7.8(11)   | 8.0(11)  | 8.3(10)   |
| F6   | 25.3(13) | 43.9(16) | 85(2)    | 16.2(16)  | -1.9(14) | -14.2(12) |
| F7   | 55.1(18) | 85(2)    | 28.5(13) | -10.3(14) | 5.4(12)  | -50.3(18) |
| F8   | 46.5(17) | 71(2)    | 43.0(16) | 4.9(15)   | 13.6(13) | 7.1(16)   |



|      |          |          |          |           |          |           |
|------|----------|----------|----------|-----------|----------|-----------|
| F9   | 48.1(15) | 66.0(19) | 16.0(11) | 1.5(12)   | 7.1(10)  | -25.1(14) |
| F10  | 57.3(18) | 44.3(16) | 45.7(16) | -0.4(13)  | 15.7(14) | 26.6(14)  |
| F11  | 67(2)    | 74(2)    | 32.6(15) | 11.0(15)  | 15.3(14) | 24.2(18)  |
| F12  | 62(2)    | 59(2)    | 115(3)   | 35(2)     | -4(2)    | -24.4(19) |
| O1   | 28.8(14) | 20.1(13) | 30.8(14) | -1.1(10)  | -0.3(11) | 5.2(11)   |
| O2   | 21.9(12) | 24.7(13) | 29.1(13) | -4.1(11)  | -0.3(10) | 0.3(11)   |
| O3   | 39.6(16) | 28.6(15) | 28.6(14) | -11.7(12) | 8.5(12)  | -6.1(13)  |
| O4   | 42.9(17) | 24.3(15) | 36.7(16) | -3.0(12)  | -4.2(13) | -10.0(13) |
| O5   | 34.6(15) | 30.2(15) | 30.3(14) | -8.8(12)  | -1.4(12) | 1.9(12)   |
| O6   | 39.3(18) | 50(2)    | 34.0(16) | 1.9(14)   | 4.1(13)  | 24.5(15)  |
| O7   | 42.4(18) | 50.0(19) | 19.6(13) | 2.5(13)   | -2.9(12) | -24.8(15) |
| O8   | 40.9(17) | 52(2)    | 16.7(12) | -0.8(12)  | 2.1(11)  | -20.0(15) |
| O9   | 77(3)    | 33.7(18) | 57(2)    | 11.1(17)  | 21(2)    | 6.1(19)   |
| O10  | 41.7(19) | 53(2)    | 42.8(19) | 0.7(16)   | 10.5(15) | 18.9(16)  |
| O11  | 68(3)    | 144(5)   | 25.1(18) | 0(2)      | 3.7(17)  | 53(3)     |
| O12  | 65(3)    | 72(3)    | 124(5)   | 40(3)     | -29(3)   | -30(3)    |
| C109 | 24.3(19) | 25.1(19) | 41(2)    | 7.7(17)   | 5.6(16)  | 4.4(15)   |
| C110 | 18.3(17) | 31(2)    | 47(2)    | 6.6(18)   | 3.9(16)  | 0.0(15)   |
| C111 | 40(2)    | 48(3)    | 17.1(17) | -6.5(17)  | 7.8(16)  | -20(2)    |
| C112 | 46(3)    | 32(2)    | 46(3)    | 2(2)      | 12(2)    | 9(2)      |
| S5   | 19.1(4)  | 15.4(4)  | 17.1(4)  | 1.9(3)    | 2.5(3)   | -0.2(3)   |
| S6   | 31.3(5)  | 27.0(4)  | 16.6(4)  | -0.7(3)   | 3.6(3)   | 8.8(4)    |
| S7   | 23.0(4)  | 15.4(4)  | 23.9(4)  | 1.5(3)    | 0.5(3)   | -0.3(3)   |
| S8   | 31.6(5)  | 24.0(4)  | 26.7(5)  | -9.1(4)   | 4.7(4)   | -4.8(4)   |
| Na2  | 24.2(7)  | 22.7(7)  | 12.9(6)  | -5.3(5)   | 6.6(5)   | -7.9(6)   |
| F13  | 38.4(14) | 41.9(15) | 32.9(13) | -14.3(11) | 12.9(11) | 0.6(11)   |
| F14  | 27.4(12) | 19.6(11) | 69.1(18) | -11.0(11) | 5.7(12)  | -6.4(9)   |
| F15  | 27.2(12) | 27.3(12) | 57.2(17) | -7.5(12)  | -5.8(11) | 11.6(10)  |
| F16  | 118(3)   | 21.9(13) | 34.3(15) | -4.2(11)  | 11.0(16) | 2.6(15)   |
| F17  | 40.4(16) | 86(2)    | 40.1(16) | 6.0(15)   | 17.1(13) | 25.9(16)  |
| F18  | 61.9(18) | 41.1(15) | 18.0(11) | -2.7(10)  | 12.6(11) | 7.7(13)   |
| F19  | 26.6(12) | 23.0(11) | 50.5(15) | -3(1)     | 5.9(11)  | -9.7(9)   |
| F20  | 30.6(13) | 22.2(12) | 81(2)    | -9.1(13)  | 2.8(13)  | 3.5(10)   |
| F21  | 48.3(16) | 49.3(16) | 34.0(14) | -15.4(12) | 16.0(12) | -20.0(13) |
| F22  | 45.3(15) | 46.2(15) | 22.5(11) | -3.7(11)  | 9.4(10)  | -18.6(13) |
| F23  | 45.0(15) | 39.0(14) | 27.3(12) | -3.3(10)  | 4.2(10)  | -20.7(12) |
| F24  | 46.6(17) | 46.4(17) | 60.5(19) | -19.4(15) | -5.5(14) | 18.8(14)  |
| O13  | 20.7(12) | 20.2(12) | 27.8(13) | -2.3(10)  | 2(1)     | -2.4(10)  |

|      |          |          |          |           |          |           |
|------|----------|----------|----------|-----------|----------|-----------|
| O14  | 21.0(12) | 24.4(13) | 20.6(12) | 2(1)      | 1.6(9)   | 2.2(10)   |
| O15  | 32.2(15) | 28.5(14) | 22.7(13) | 9.1(11)   | 6.3(11)  | 2.9(11)   |
| O16  | 31.5(15) | 35.9(16) | 17.1(12) | -0.3(11)  | 2.1(10)  | 6.8(12)   |
| O17  | 31.2(16) | 85(3)    | 22.0(14) | 2.2(16)   | 2.5(12)  | 11.0(17)  |
| O18  | 78(3)    | 24.0(15) | 31.7(16) | 0.5(13)   | -0.3(16) | 2.0(16)   |
| O19  | 40.2(16) | 28.8(14) | 27.7(14) | 7.5(12)   | 3.2(12)  | 0.6(13)   |
| O20  | 29.8(15) | 23.2(14) | 38.7(16) | -0.2(12)  | -7.8(12) | 5.3(11)   |
| O21  | 28.4(15) | 26.5(14) | 39.3(16) | -4.9(12)  | 5.0(12)  | -10.0(12) |
| O22  | 55(2)    | 41.6(19) | 39.1(18) | -5.7(15)  | 6.8(15)  | -25.9(17) |
| O23  | 60(2)    | 46(2)    | 23.3(14) | -4.2(13)  | 5.0(14)  | -20.4(17) |
| O24  | 51(2)    | 41(2)    | 61(2)    | -6.3(17)  | 10.1(18) | 11.8(17)  |
| C113 | 22.2(18) | 23.2(18) | 36(2)    | -4.8(15)  | 4.2(15)  | -1.3(14)  |
| C114 | 46(2)    | 30(2)    | 19.5(18) | 3.3(15)   | 7.2(16)  | 5.7(18)   |
| C115 | 24.7(18) | 19.1(17) | 36(2)    | -0.8(15)  | 6.5(15)  | -1.5(14)  |
| C116 | 32(2)    | 22.6(18) | 25.5(18) | -1.9(14)  | 4.1(15)  | -2.0(15)  |
| S9   | 43.2(6)  | 28.9(5)  | 43.0(6)  | -6.8(5)   | 11.8(5)  | -9.8(5)   |
| F25  | 45.7(15) | 29.3(13) | 58.5(17) | -2.8(12)  | 15.4(13) | -9.3(12)  |
| F26  | 47.7(17) | 34.9(15) | 104(3)   | -4.8(17)  | 36.7(18) | 2.6(14)   |
| F27  | 56.4(19) | 76(2)    | 35.8(15) | -8.1(15)  | 17.8(14) | -12.0(17) |
| O25  | 66(2)    | 41.7(19) | 51(2)    | -0.6(17)  | 32.9(18) | -5.8(18)  |
| O26  | 45.7(19) | 39.6(18) | 35.3(17) | -11.3(14) | 6.3(14)  | -4.6(15)  |
| O27  | 52(2)    | 36.5(19) | 69(2)    | -27.1(17) | 29.9(18) | -19.2(16) |
| O31  | 66(3)    | 83(3)    | 93(4)    | 49(3)     | 24(3)    | 18(3)     |
| C117 | 42(3)    | 36(2)    | 48(3)    | 2(2)      | 18(2)    | -3(2)     |
| S10  | 45.6(7)  | 44.0(7)  | 42.1(6)  | -2.3(5)   | 16.5(5)  | -3.0(5)   |
| F28  | 122(4)   | 76(3)    | 71(3)    | 24(2)     | -36(2)   | -44(3)    |
| F29  | 97(3)    | 73(3)    | 78(3)    | -30(2)    | 9(2)     | 1(2)      |
| F30  | 52(2)    | 115(4)   | 96(3)    | 3(3)      | 17(2)    | -18(2)    |
| O28  | 58(3)    | 80(3)    | 103(4)   | -18(3)    | 31(3)    | -22(3)    |
| O29  | 100(4)   | 41(2)    | 67(3)    | -1(2)     | 23(3)    | 3(2)      |
| O30  | 149(5)   | 44(2)    | 58(3)    | 22(2)     | -24(3)   | -27(3)    |
| C118 | 44(3)    | 34(3)    | 115(5)   | 49(3)     | -29(3)   | -21(2)    |

**Table S10.** Bond Lengths for Fe(MPT).

| Atom | Atom | Length/Å | Atom | Atom | Length/Å |
|------|------|----------|------|------|----------|
| Fe1  | N1   | 2.225(3) | Fe4  | N20  | 2.216(3) |
| Fe1  | N2   | 2.215(3) | Fe4  | N21  | 2.234(3) |
| Fe1  | N3   | 2.216(3) | Fe4  | N22  | 2.209(3) |
| Fe1  | N4   | 2.243(3) | Fe4  | N23  | 2.220(3) |
| Fe1  | N5   | 2.207(3) | Fe4  | N24  | 2.222(3) |
| Fe1  | N6   | 2.230(3) | N19  | C82  | 1.480(4) |
| N1   | C1   | 1.465(4) | N19  | C89  | 1.472(5) |
| N1   | C8   | 1.502(5) | N19  | C108 | 1.484(5) |
| N1   | C27  | 1.484(4) | N20  | C83  | 1.351(5) |
| N2   | C2   | 1.366(4) | N20  | C87  | 1.353(4) |
| N2   | C6   | 1.347(4) | N21  | C90  | 1.490(5) |
| N3   | C9   | 1.473(4) | N21  | C91  | 1.467(5) |
| N3   | C10  | 1.477(4) | N21  | C98  | 1.480(5) |
| N3   | C17  | 1.499(4) | N22  | C92  | 1.356(4) |
| N4   | C11  | 1.361(4) | N22  | C96  | 1.347(5) |
| N4   | C15  | 1.358(4) | N23  | C99  | 1.505(5) |
| N5   | C18  | 1.482(4) | N23  | C100 | 1.478(5) |
| N5   | C19  | 1.470(5) | N23  | C107 | 1.475(5) |
| N5   | C26  | 1.490(4) | N24  | C101 | 1.367(5) |
| N6   | C20  | 1.353(5) | N24  | C105 | 1.350(5) |
| N6   | C24  | 1.366(5) | C82  | C83  | 1.508(5) |
| C1   | C2   | 1.513(5) | C83  | C84  | 1.387(5) |
| C2   | C3   | 1.369(5) | C84  | C85  | 1.383(5) |
| C3   | C4   | 1.404(5) | C85  | C86  | 1.378(6) |
| C4   | C5   | 1.374(6) | C86  | C87  | 1.386(5) |
| C5   | C6   | 1.398(5) | C87  | C88  | 1.500(5) |
| C6   | C7   | 1.498(5) | C89  | C90  | 1.526(5) |
| C8   | C9   | 1.524(5) | C91  | C92  | 1.500(5) |
| C10  | C11  | 1.499(5) | C92  | C93  | 1.377(5) |
| C11  | C12  | 1.377(5) | C93  | C94  | 1.397(6) |
| C12  | C13  | 1.392(5) | C94  | C95  | 1.386(6) |
| C13  | C14  | 1.383(5) | C95  | C96  | 1.383(5) |
| C14  | C15  | 1.375(5) | C96  | C97  | 1.497(5) |
| C15  | C16  | 1.504(5) | C98  | C99  | 1.528(6) |
| C17  | C18  | 1.525(5) | C100 | C101 | 1.510(5) |
| C19  | C20  | 1.504(5) | C101 | C102 | 1.387(5) |

|     |     |          |      |      |            |
|-----|-----|----------|------|------|------------|
| C20 | C21 | 1.383(5) | C102 | C103 | 1.383(6)   |
| C21 | C22 | 1.389(6) | C103 | C104 | 1.395(6)   |
| C22 | C23 | 1.376(7) | C104 | C105 | 1.385(5)   |
| C23 | C24 | 1.386(5) | C105 | C106 | 1.495(5)   |
| C24 | C25 | 1.502(6) | C107 | C108 | 1.533(6)   |
| C26 | C27 | 1.531(5) | S1   | Na1  | 3.0922(17) |
| Fe3 | N13 | 2.202(3) | S1   | O1   | 1.449(3)   |
| Fe3 | N14 | 2.313(3) | S1   | O2   | 1.443(3)   |
| Fe3 | N15 | 2.234(3) | S1   | O3   | 1.435(3)   |
| Fe3 | N16 | 2.271(3) | S1   | C109 | 1.833(4)   |
| Fe3 | N17 | 2.237(3) | S2   | Na1  | 3.1410(17) |
| Fe3 | N18 | 2.226(3) | S2   | O4   | 1.445(3)   |
| N13 | C55 | 1.472(5) | S2   | O5   | 1.437(3)   |
| N13 | C62 | 1.476(5) | S2   | O6   | 1.439(3)   |
| N13 | C81 | 1.494(5) | S2   | C110 | 1.824(4)   |
| N14 | C56 | 1.345(5) | S3   | O7   | 1.434(3)   |
| N14 | C60 | 1.364(5) | S3   | O8   | 1.435(3)   |
| N15 | C63 | 1.501(5) | S3   | O9   | 1.424(4)   |
| N15 | C64 | 1.475(4) | S3   | C111 | 1.822(5)   |
| N15 | C71 | 1.481(5) | S4   | O10  | 1.415(3)   |
| N16 | C65 | 1.352(4) | S4   | O11  | 1.463(4)   |
| N16 | C69 | 1.353(4) | S4   | O12  | 1.394(5)   |
| N17 | C72 | 1.500(5) | S4   | C112 | 1.822(5)   |
| N17 | C73 | 1.470(5) | Na1  | O1   | 2.629(3)   |
| N17 | C80 | 1.474(5) | Na1  | O3   | 2.589(4)   |
| N18 | C74 | 1.355(4) | Na1  | O4   | 2.478(4)   |
| N18 | C78 | 1.365(5) | Na1  | O5   | 2.789(3)   |
| C55 | C56 | 1.497(6) | Na1  | O9   | 2.278(4)   |
| C56 | C57 | 1.385(6) | Na1  | O12  | 2.207(5)   |
| C57 | C58 | 1.375(7) | F1   | C109 | 1.338(5)   |
| C58 | C59 | 1.390(8) | F2   | C109 | 1.327(5)   |
| C59 | C60 | 1.384(6) | F3   | C109 | 1.323(5)   |
| C60 | C61 | 1.482(6) | F4   | C110 | 1.335(5)   |
| C62 | C63 | 1.516(5) | F5   | C110 | 1.335(5)   |
| C64 | C65 | 1.507(5) | F6   | C110 | 1.337(5)   |
| C65 | C66 | 1.386(5) | F7   | C111 | 1.323(5)   |
| C66 | C67 | 1.371(5) | F8   | C111 | 1.358(6)   |
| C67 | C68 | 1.389(5) | F9   | C111 | 1.331(4)   |

|     |     |          |     |      |            |
|-----|-----|----------|-----|------|------------|
| C68 | C69 | 1.388(5) | F10 | C112 | 1.304(5)   |
| C69 | C70 | 1.499(5) | F11 | C112 | 1.354(6)   |
| C71 | C72 | 1.522(5) | F12 | C112 | 1.303(6)   |
| C73 | C74 | 1.508(5) | S5  | Na2  | 3.1063(16) |
| C74 | C75 | 1.389(5) | S5  | O13  | 1.452(3)   |
| C75 | C76 | 1.381(6) | S5  | O14  | 1.435(3)   |
| C76 | C77 | 1.393(6) | S5  | O15  | 1.438(3)   |
| C77 | C78 | 1.399(5) | S5  | C113 | 1.821(4)   |
| C78 | C79 | 1.493(5) | S6  | O16  | 1.437(3)   |
| C80 | C81 | 1.499(6) | S6  | O17  | 1.427(4)   |
| Fe2 | N7  | 2.235(3) | S6  | O18  | 1.435(4)   |
| Fe2 | N8  | 2.232(3) | S6  | C114 | 1.821(4)   |
| Fe2 | N9  | 2.208(3) | S7  | Na2  | 3.1315(17) |
| Fe2 | N10 | 2.235(3) | S7  | O19  | 1.443(3)   |
| Fe2 | N11 | 2.229(3) | S7  | O20  | 1.448(3)   |
| Fe2 | N12 | 2.209(3) | S7  | O21  | 1.446(3)   |
| N7  | C28 | 1.483(5) | S7  | C115 | 1.827(4)   |
| N7  | C35 | 1.498(5) | S8  | O22  | 1.447(3)   |
| N7  | C54 | 1.480(5) | S8  | O23  | 1.433(3)   |
| N8  | C29 | 1.358(4) | S8  | O24  | 1.445(4)   |
| N8  | C33 | 1.347(4) | S8  | C116 | 1.822(4)   |
| N9  | C36 | 1.491(5) | Na2 | O13  | 2.441(3)   |
| N9  | C37 | 1.479(5) | Na2 | O15  | 2.793(3)   |
| N9  | C44 | 1.495(5) | Na2 | O18  | 2.315(4)   |
| N10 | C38 | 1.352(5) | Na2 | O19  | 2.753(3)   |
| N10 | C42 | 1.345(5) | Na2 | O20  | 2.512(3)   |
| N11 | C45 | 1.490(5) | Na2 | O24  | 2.239(4)   |
| N11 | C46 | 1.471(5) | F13 | C113 | 1.355(5)   |
| N11 | C53 | 1.489(5) | F14 | C113 | 1.335(4)   |
| N12 | C47 | 1.366(5) | F15 | C113 | 1.322(5)   |
| N12 | C51 | 1.352(4) | F16 | C114 | 1.318(5)   |
| C28 | C29 | 1.503(5) | F17 | C114 | 1.331(6)   |
| C29 | C30 | 1.382(5) | F18 | C114 | 1.330(5)   |
| C30 | C31 | 1.374(6) | F19 | C115 | 1.333(4)   |
| C31 | C32 | 1.365(6) | F20 | C115 | 1.327(5)   |
| C32 | C33 | 1.398(5) | F21 | C115 | 1.338(5)   |
| C33 | C34 | 1.503(5) | F22 | C116 | 1.314(5)   |
| C35 | C36 | 1.502(6) | F23 | C116 | 1.345(5)   |

|     |     |          |     |      |          |
|-----|-----|----------|-----|------|----------|
| C37 | C38 | 1.506(5) | F24 | C116 | 1.329(5) |
| C38 | C39 | 1.377(5) | S9  | O25  | 1.468(4) |
| C39 | C40 | 1.385(6) | S9  | O26  | 1.427(4) |
| C40 | C41 | 1.375(6) | S9  | O27  | 1.424(3) |
| C41 | C42 | 1.406(5) | S9  | C117 | 1.805(5) |
| C42 | C43 | 1.501(6) | F25 | C117 | 1.326(6) |
| C44 | C45 | 1.519(5) | F26 | C117 | 1.356(6) |
| C46 | C47 | 1.497(5) | F27 | C117 | 1.331(6) |
| C47 | C48 | 1.378(5) | S10 | O28  | 1.429(5) |
| C48 | C49 | 1.393(6) | S10 | O29  | 1.446(5) |
| C49 | C50 | 1.364(7) | S10 | O30  | 1.404(4) |
| C50 | C51 | 1.401(5) | S10 | C118 | 1.868(6) |
| C51 | C52 | 1.485(5) | F28 | C118 | 1.256(6) |
| C53 | C54 | 1.524(5) | F29 | C118 | 1.185(7) |
| Fe4 | N19 | 2.216(3) | F30 | C118 | 1.493(8) |

**Table S11.** Bond Angles for Fe(MPT).

| Atom | Atom | Atom | Angle/°    | Atom | Atom | Atom | Angle/°  |
|------|------|------|------------|------|------|------|----------|
| N1   | Fe1  | N4   | 155.28(11) | C90  | N21  | Fe4  | 110.3(2) |
| N1   | Fe1  | N6   | 97.95(11)  | C91  | N21  | Fe4  | 105.4(2) |
| N2   | Fe1  | N1   | 78.48(11)  | C91  | N21  | C90  | 112.1(3) |
| N2   | Fe1  | N3   | 96.91(11)  | C91  | N21  | C98  | 111.2(3) |
| N2   | Fe1  | N4   | 105.18(10) | C98  | N21  | Fe4  | 107.1(2) |
| N2   | Fe1  | N6   | 104.72(11) | C98  | N21  | C90  | 110.5(3) |
| N3   | Fe1  | N1   | 77.94(11)  | C92  | N22  | Fe4  | 112.5(2) |
| N3   | Fe1  | N4   | 77.35(10)  | C96  | N22  | Fe4  | 129.0(2) |
| N3   | Fe1  | N6   | 156.77(11) | C96  | N22  | C92  | 118.4(3) |
| N5   | Fe1  | N1   | 79.08(11)  | C99  | N23  | Fe4  | 113.2(2) |
| N5   | Fe1  | N2   | 157.54(11) | C100 | N23  | Fe4  | 103.4(2) |
| N5   | Fe1  | N3   | 79.39(11)  | C100 | N23  | C99  | 110.3(3) |
| N5   | Fe1  | N4   | 95.68(10)  | C107 | N23  | Fe4  | 104.6(2) |
| N5   | Fe1  | N6   | 77.39(11)  | C107 | N23  | C99  | 111.9(3) |
| N6   | Fe1  | N4   | 104.50(10) | C107 | N23  | C100 | 113.1(3) |
| C1   | N1   | Fe1  | 105.4(2)   | C101 | N24  | Fe4  | 109.8(2) |
| C1   | N1   | C8   | 110.4(3)   | C105 | N24  | Fe4  | 129.2(2) |
| C1   | N1   | C27  | 111.9(3)   | C105 | N24  | C101 | 118.3(3) |
| C8   | N1   | Fe1  | 111.9(2)   | N19  | C82  | C83  | 110.8(3) |
| C27  | N1   | Fe1  | 104.9(2)   | N20  | C83  | C82  | 117.4(3) |
| C27  | N1   | C8   | 112.0(3)   | N20  | C83  | C84  | 123.4(3) |
| C2   | N2   | Fe1  | 111.4(2)   | C84  | C83  | C82  | 119.0(3) |
| C6   | N2   | Fe1  | 129.3(2)   | C85  | C84  | C83  | 118.2(3) |
| C6   | N2   | C2   | 118.5(3)   | C86  | C85  | C84  | 118.8(3) |
| C9   | N3   | Fe1  | 106.7(2)   | C85  | C86  | C87  | 120.5(3) |
| C9   | N3   | C10  | 111.1(3)   | N20  | C87  | C86  | 121.1(3) |
| C9   | N3   | C17  | 111.3(3)   | N20  | C87  | C88  | 119.1(3) |
| C10  | N3   | Fe1  | 104.9(2)   | C86  | C87  | C88  | 119.8(3) |
| C10  | N3   | C17  | 111.7(3)   | N19  | C89  | C90  | 110.2(3) |
| C17  | N3   | Fe1  | 110.9(2)   | N21  | C90  | C89  | 112.7(3) |
| C11  | N4   | Fe1  | 111.4(2)   | N21  | C91  | C92  | 111.3(3) |
| C15  | N4   | Fe1  | 130.7(2)   | N22  | C92  | C91  | 117.1(3) |
| C15  | N4   | C11  | 117.4(3)   | N22  | C92  | C93  | 122.9(3) |
| C18  | N5   | Fe1  | 105.5(2)   | C93  | C92  | C91  | 119.9(3) |
| C18  | N5   | C26  | 111.4(3)   | C92  | C93  | C94  | 118.7(3) |
| C19  | N5   | Fe1  | 106.0(2)   | C95  | C94  | C93  | 118.2(4) |

|     |     |     |          |      |      |      |            |
|-----|-----|-----|----------|------|------|------|------------|
| C19 | N5  | C18 | 110.9(3) | C96  | C95  | C94  | 120.4(4)   |
| C19 | N5  | C26 | 112.0(3) | N22  | C96  | C95  | 121.4(3)   |
| C26 | N5  | Fe1 | 110.7(2) | N22  | C96  | C97  | 119.6(3)   |
| C20 | N6  | Fe1 | 112.0(2) | C95  | C96  | C97  | 118.9(3)   |
| C20 | N6  | C24 | 117.4(3) | N21  | C98  | C99  | 111.3(3)   |
| C24 | N6  | Fe1 | 130.6(3) | N23  | C99  | C98  | 110.8(3)   |
| N1  | C1  | C2  | 110.7(3) | N23  | C100 | C101 | 109.1(3)   |
| N2  | C2  | C1  | 116.4(3) | N24  | C101 | C100 | 115.5(3)   |
| N2  | C2  | C3  | 122.4(3) | N24  | C101 | C102 | 122.6(3)   |
| C3  | C2  | C1  | 121.2(3) | C102 | C101 | C100 | 121.9(3)   |
| C2  | C3  | C4  | 119.2(3) | C103 | C102 | C101 | 118.5(4)   |
| C5  | C4  | C3  | 118.2(3) | C102 | C103 | C104 | 119.3(4)   |
| C4  | C5  | C6  | 120.3(3) | C105 | C104 | C103 | 119.5(4)   |
| N2  | C6  | C5  | 121.0(3) | N24  | C105 | C104 | 121.7(3)   |
| N2  | C6  | C7  | 119.3(3) | N24  | C105 | C106 | 118.9(3)   |
| C5  | C6  | C7  | 119.7(3) | C104 | C105 | C106 | 119.4(3)   |
| N1  | C8  | C9  | 110.9(3) | N23  | C107 | C108 | 110.0(3)   |
| N3  | C9  | C8  | 110.2(3) | N19  | C108 | C107 | 112.9(3)   |
| N3  | C10 | C11 | 110.9(3) | O1   | S1   | Na1  | 58.01(12)  |
| N4  | C11 | C10 | 116.6(3) | O1   | S1   | C109 | 103.13(18) |
| N4  | C11 | C12 | 123.0(3) | O2   | S1   | Na1  | 133.27(13) |
| C12 | C11 | C10 | 120.3(3) | O2   | S1   | O1   | 115.25(17) |
| C11 | C12 | C13 | 119.0(3) | O2   | S1   | C109 | 103.02(18) |
| C14 | C13 | C12 | 118.0(3) | O3   | S1   | Na1  | 56.34(14)  |
| C15 | C14 | C13 | 120.6(3) | O3   | S1   | O1   | 113.50(18) |
| N4  | C15 | C14 | 121.7(3) | O3   | S1   | O2   | 115.87(17) |
| N4  | C15 | C16 | 117.6(3) | O3   | S1   | C109 | 103.7(2)   |
| C14 | C15 | C16 | 120.6(3) | C109 | S1   | Na1  | 123.71(15) |
| N3  | C17 | C18 | 112.0(3) | O4   | S2   | Na1  | 50.19(14)  |
| N5  | C18 | C17 | 111.3(3) | O4   | S2   | C110 | 103.13(19) |
| N5  | C19 | C20 | 111.7(3) | O5   | S2   | Na1  | 62.62(13)  |
| N6  | C20 | C19 | 117.2(3) | O5   | S2   | O4   | 112.69(19) |
| N6  | C20 | C21 | 123.5(4) | O5   | S2   | O6   | 115.71(19) |
| C21 | C20 | C19 | 119.1(3) | O5   | S2   | C110 | 104.7(2)   |
| C20 | C21 | C22 | 118.7(4) | O6   | S2   | Na1  | 137.47(16) |
| C23 | C22 | C21 | 118.5(4) | O6   | S2   | O4   | 115.4(2)   |
| C22 | C23 | C24 | 120.7(4) | O6   | S2   | C110 | 103.2(2)   |
| N6  | C24 | C23 | 121.3(4) | C110 | S2   | Na1  | 118.66(14) |



|     |     |     |            |     |     |      |            |
|-----|-----|-----|------------|-----|-----|------|------------|
| N6  | C24 | C25 | 118.1(3)   | O7  | S3  | O8   | 115.21(18) |
| C23 | C24 | C25 | 120.6(4)   | O7  | S3  | C111 | 102.6(2)   |
| N5  | C26 | C27 | 112.9(3)   | O8  | S3  | C111 | 103.2(2)   |
| N1  | C27 | C26 | 109.4(3)   | O9  | S3  | O7   | 115.8(2)   |
| N13 | Fe3 | N14 | 74.48(12)  | O9  | S3  | O8   | 115.7(2)   |
| N13 | Fe3 | N15 | 78.17(12)  | O9  | S3  | C111 | 101.1(2)   |
| N13 | Fe3 | N16 | 107.08(11) | O10 | S4  | O11  | 113.2(2)   |
| N13 | Fe3 | N17 | 77.30(12)  | O10 | S4  | C112 | 106.0(2)   |
| N13 | Fe3 | N18 | 150.08(12) | O11 | S4  | C112 | 99.4(3)    |
| N15 | Fe3 | N14 | 150.67(12) | O12 | S4  | O10  | 118.7(3)   |
| N15 | Fe3 | N16 | 74.56(11)  | O12 | S4  | O11  | 114.3(4)   |
| N15 | Fe3 | N17 | 77.32(11)  | O12 | S4  | C112 | 102.0(3)   |
| N16 | Fe3 | N14 | 103.53(11) | S1  | Na1 | S2   | 99.12(5)   |
| N17 | Fe3 | N14 | 106.36(11) | O1  | Na1 | S1   | 27.87(6)   |
| N17 | Fe3 | N16 | 149.81(11) | O1  | Na1 | S2   | 119.03(8)  |
| N18 | Fe3 | N14 | 99.10(11)  | O1  | Na1 | O5   | 95.52(10)  |
| N18 | Fe3 | N15 | 109.94(11) | O3  | Na1 | S1   | 27.47(6)   |
| N18 | Fe3 | N16 | 102.84(10) | O3  | Na1 | S2   | 82.26(8)   |
| N18 | Fe3 | N17 | 76.66(11)  | O3  | Na1 | O1   | 55.05(9)   |
| C55 | N13 | Fe3 | 106.0(2)   | O3  | Na1 | O5   | 76.56(10)  |
| C55 | N13 | C62 | 110.7(3)   | O4  | Na1 | S1   | 115.41(9)  |
| C55 | N13 | C81 | 110.7(3)   | O4  | Na1 | S2   | 26.61(7)   |
| C62 | N13 | Fe3 | 112.9(2)   | O4  | Na1 | O1   | 141.03(11) |
| C62 | N13 | C81 | 111.0(3)   | O4  | Na1 | O3   | 91.28(11)  |
| C81 | N13 | Fe3 | 105.4(2)   | O4  | Na1 | O5   | 53.80(9)   |
| C56 | N14 | Fe3 | 109.6(2)   | O5  | Na1 | S1   | 82.78(7)   |
| C56 | N14 | C60 | 118.3(3)   | O5  | Na1 | S2   | 27.23(6)   |
| C60 | N14 | Fe3 | 131.8(3)   | O9  | Na1 | S1   | 120.25(12) |
| C63 | N15 | Fe3 | 104.1(2)   | O9  | Na1 | S2   | 92.81(11)  |
| C64 | N15 | Fe3 | 105.1(2)   | O9  | Na1 | O1   | 97.74(13)  |
| C64 | N15 | C63 | 111.9(3)   | O9  | Na1 | O3   | 142.86(15) |
| C64 | N15 | C71 | 111.0(3)   | O9  | Na1 | O4   | 100.59(13) |
| C71 | N15 | Fe3 | 113.5(2)   | O9  | Na1 | O5   | 82.41(13)  |
| C71 | N15 | C63 | 110.9(3)   | O12 | Na1 | S1   | 109.38(14) |
| C65 | N16 | Fe3 | 111.0(2)   | O12 | Na1 | S2   | 133.89(19) |
| C65 | N16 | C69 | 117.9(3)   | O12 | Na1 | O1   | 101.80(18) |
| C69 | N16 | Fe3 | 131.0(2)   | O12 | Na1 | O3   | 107.29(16) |
| C72 | N17 | Fe3 | 105.0(2)   | O12 | Na1 | O4   | 107.3(2)   |

|     |     |     |          |     |      |      |            |
|-----|-----|-----|----------|-----|------|------|------------|
| C73 | N17 | Fe3 | 104.6(2) | O12 | Na1  | O5   | 161.1(2)   |
| C73 | N17 | C72 | 110.2(3) | O12 | Na1  | O9   | 102.5(2)   |
| C73 | N17 | C80 | 111.5(3) | S1  | O1   | Na1  | 94.12(14)  |
| C80 | N17 | Fe3 | 112.9(2) | S1  | O3   | Na1  | 96.19(16)  |
| C80 | N17 | C72 | 112.2(3) | S2  | O4   | Na1  | 103.20(16) |
| C74 | N18 | Fe3 | 112.1(2) | S2  | O5   | Na1  | 90.14(14)  |
| C74 | N18 | C78 | 117.4(3) | S3  | O9   | Na1  | 169.0(3)   |
| C78 | N18 | Fe3 | 130.4(2) | S4  | O12  | Na1  | 174.6(5)   |
| N13 | C55 | C56 | 110.5(3) | F1  | C109 | S1   | 110.7(3)   |
| N14 | C56 | C55 | 118.5(3) | F2  | C109 | S1   | 111.7(3)   |
| N14 | C56 | C57 | 122.7(4) | F2  | C109 | F1   | 107.0(3)   |
| C57 | C56 | C55 | 118.9(4) | F3  | C109 | S1   | 111.0(3)   |
| C58 | C57 | C56 | 119.0(4) | F3  | C109 | F1   | 108.7(4)   |
| C57 | C58 | C59 | 119.1(4) | F3  | C109 | F2   | 107.5(3)   |
| C60 | C59 | C58 | 119.4(4) | F4  | C110 | S2   | 110.9(3)   |
| N14 | C60 | C59 | 121.5(4) | F4  | C110 | F5   | 107.6(3)   |
| N14 | C60 | C61 | 119.6(3) | F4  | C110 | F6   | 107.8(4)   |
| C59 | C60 | C61 | 119.0(4) | F5  | C110 | S2   | 111.4(3)   |
| N13 | C62 | C63 | 111.1(3) | F5  | C110 | F6   | 107.9(4)   |
| N15 | C63 | C62 | 110.5(3) | F6  | C110 | S2   | 111.0(3)   |
| N15 | C64 | C65 | 110.2(3) | F7  | C111 | S3   | 112.3(3)   |
| N16 | C65 | C64 | 117.8(3) | F7  | C111 | F8   | 105.5(4)   |
| N16 | C65 | C66 | 123.0(3) | F7  | C111 | F9   | 108.8(3)   |
| C66 | C65 | C64 | 119.2(3) | F8  | C111 | S3   | 110.4(3)   |
| C67 | C66 | C65 | 119.1(3) | F9  | C111 | S3   | 112.1(3)   |
| C66 | C67 | C68 | 118.5(3) | F9  | C111 | F8   | 107.5(4)   |
| C69 | C68 | C67 | 120.1(3) | F10 | C112 | S4   | 112.0(3)   |
| N16 | C69 | C68 | 121.3(3) | F10 | C112 | F11  | 108.2(4)   |
| N16 | C69 | C70 | 118.6(3) | F11 | C112 | S4   | 109.8(3)   |
| C68 | C69 | C70 | 120.1(3) | F12 | C112 | S4   | 113.3(4)   |
| N15 | C71 | C72 | 110.0(3) | F12 | C112 | F10  | 110.0(4)   |
| N17 | C72 | C71 | 110.9(3) | F12 | C112 | F11  | 103.1(4)   |
| N17 | C73 | C74 | 110.6(3) | O13 | S5   | Na2  | 50.01(11)  |
| N18 | C74 | C73 | 117.0(3) | O13 | S5   | C113 | 103.13(17) |
| N18 | C74 | C75 | 123.0(4) | O14 | S5   | Na2  | 133.99(12) |
| C75 | C74 | C73 | 120.0(3) | O14 | S5   | O13  | 114.95(16) |
| C76 | C75 | C74 | 119.5(4) | O14 | S5   | O15  | 116.18(16) |
| C75 | C76 | C77 | 118.5(4) | O14 | S5   | C113 | 104.01(18) |

|     |     |     |            |      |     |      |            |
|-----|-----|-----|------------|------|-----|------|------------|
| C76 | C77 | C78 | 119.5(4)   | O15  | S5  | Na2  | 64.00(12)  |
| N18 | C78 | C77 | 122.0(3)   | O15  | S5  | O13  | 113.40(17) |
| N18 | C78 | C79 | 118.6(3)   | O15  | S5  | C113 | 102.88(18) |
| C77 | C78 | C79 | 119.4(3)   | C113 | S5  | Na2  | 121.23(14) |
| N17 | C80 | C81 | 110.3(3)   | O16  | S6  | C114 | 103.92(18) |
| N13 | C81 | C80 | 111.6(3)   | O17  | S6  | O16  | 116.17(19) |
| N7  | Fe2 | N10 | 156.42(11) | O17  | S6  | O18  | 113.3(2)   |
| N8  | Fe2 | N7  | 77.62(11)  | O17  | S6  | C114 | 103.5(2)   |
| N8  | Fe2 | N10 | 104.32(11) | O18  | S6  | O16  | 115.6(2)   |
| N9  | Fe2 | N7  | 78.59(11)  | O18  | S6  | C114 | 101.8(2)   |
| N9  | Fe2 | N8  | 95.01(11)  | O19  | S7  | Na2  | 61.52(13)  |
| N9  | Fe2 | N10 | 77.83(11)  | O19  | S7  | O20  | 113.14(19) |
| N9  | Fe2 | N11 | 79.07(12)  | O19  | S7  | O21  | 115.89(19) |
| N9  | Fe2 | N12 | 156.60(12) | O19  | S7  | C115 | 103.42(19) |
| N11 | Fe2 | N7  | 77.88(11)  | O20  | S7  | Na2  | 51.92(13)  |
| N11 | Fe2 | N8  | 155.47(11) | O20  | S7  | C115 | 103.49(18) |
| N11 | Fe2 | N10 | 97.71(11)  | O21  | S7  | Na2  | 136.27(13) |
| N12 | Fe2 | N7  | 96.95(11)  | O21  | S7  | O20  | 115.24(19) |
| N12 | Fe2 | N8  | 106.55(11) | O21  | S7  | C115 | 103.44(18) |
| N12 | Fe2 | N10 | 104.76(11) | C115 | S7  | Na2  | 119.92(13) |
| N12 | Fe2 | N11 | 77.54(11)  | O22  | S8  | C116 | 102.96(19) |
| C28 | N7  | Fe2 | 103.9(2)   | O23  | S8  | O22  | 115.4(2)   |
| C28 | N7  | C35 | 111.6(3)   | O23  | S8  | O24  | 115.8(2)   |
| C35 | N7  | Fe2 | 110.7(2)   | O23  | S8  | C116 | 104.39(19) |
| C54 | N7  | Fe2 | 106.0(2)   | O24  | S8  | O22  | 113.9(2)   |
| C54 | N7  | C28 | 112.6(3)   | O24  | S8  | C116 | 101.9(2)   |
| C54 | N7  | C35 | 111.6(3)   | S5   | Na2 | S7   | 95.00(5)   |
| C29 | N8  | Fe2 | 111.5(2)   | O13  | Na2 | S5   | 27.11(6)   |
| C33 | N8  | Fe2 | 129.1(2)   | O13  | Na2 | S7   | 115.45(8)  |
| C33 | N8  | C29 | 118.1(3)   | O13  | Na2 | O15  | 54.48(8)   |
| C36 | N9  | Fe2 | 106.1(2)   | O13  | Na2 | O19  | 92.60(10)  |
| C36 | N9  | C44 | 111.8(3)   | O13  | Na2 | O20  | 137.71(11) |
| C37 | N9  | Fe2 | 104.6(2)   | O15  | Na2 | S5   | 27.57(6)   |
| C37 | N9  | C36 | 111.2(3)   | O15  | Na2 | S7   | 76.89(7)   |
| C37 | N9  | C44 | 111.8(3)   | O18  | Na2 | S5   | 124.71(10) |
| C44 | N9  | Fe2 | 111.0(2)   | O18  | Na2 | S7   | 110.98(11) |
| C38 | N10 | Fe2 | 111.3(2)   | O18  | Na2 | O13  | 99.04(11)  |
| C42 | N10 | Fe2 | 130.2(2)   | O18  | Na2 | O15  | 151.37(11) |

|     |     |     |          |     |      |     |            |
|-----|-----|-----|----------|-----|------|-----|------------|
| C42 | N10 | C38 | 118.4(3) | O18 | Na2  | O19 | 102.12(12) |
| C45 | N11 | Fe2 | 103.9(2) | O18 | Na2  | O20 | 112.13(12) |
| C46 | N11 | Fe2 | 105.6(2) | O19 | Na2  | S5  | 79.17(7)   |
| C46 | N11 | C45 | 110.9(3) | O19 | Na2  | S7  | 27.44(6)   |
| C46 | N11 | C53 | 111.9(3) | O19 | Na2  | O15 | 71.80(9)   |
| C53 | N11 | Fe2 | 111.7(2) | O20 | Na2  | S5  | 112.33(8)  |
| C53 | N11 | C45 | 112.3(3) | O20 | Na2  | S7  | 26.99(7)   |
| C47 | N12 | Fe2 | 112.6(2) | O20 | Na2  | O15 | 87.51(10)  |
| C51 | N12 | Fe2 | 128.5(2) | O20 | Na2  | O19 | 54.33(9)   |
| C51 | N12 | C47 | 118.9(3) | O24 | Na2  | S5  | 108.18(11) |
| N7  | C28 | C29 | 109.8(3) | O24 | Na2  | S7  | 122.08(12) |
| N8  | C29 | C28 | 116.0(3) | O24 | Na2  | O13 | 107.47(13) |
| N8  | C29 | C30 | 122.7(3) | O24 | Na2  | O15 | 100.40(13) |
| C30 | C29 | C28 | 121.4(3) | O24 | Na2  | O18 | 98.05(15)  |
| C31 | C30 | C29 | 118.7(4) | O24 | Na2  | O19 | 148.84(13) |
| C32 | C31 | C30 | 119.4(4) | O24 | Na2  | O20 | 96.04(13)  |
| C31 | C32 | C33 | 120.0(4) | S5  | O13  | Na2 | 102.88(14) |
| N8  | C33 | C32 | 121.1(3) | S5  | O15  | Na2 | 88.43(14)  |
| N8  | C33 | C34 | 119.0(3) | S6  | O18  | Na2 | 153.8(2)   |
| C32 | C33 | C34 | 119.9(3) | S7  | O19  | Na2 | 91.05(14)  |
| N7  | C35 | C36 | 112.5(3) | S7  | O20  | Na2 | 101.09(16) |
| N9  | C36 | C35 | 110.8(3) | S8  | O24  | Na2 | 160.7(3)   |
| N9  | C37 | C38 | 111.1(3) | F13 | C113 | S5  | 110.7(3)   |
| N10 | C38 | C37 | 116.8(3) | F14 | C113 | S5  | 111.4(3)   |
| N10 | C38 | C39 | 123.1(4) | F14 | C113 | F13 | 106.9(3)   |
| C39 | C38 | C37 | 119.9(3) | F15 | C113 | S5  | 112.3(3)   |
| C38 | C39 | C40 | 118.6(4) | F15 | C113 | F13 | 107.9(3)   |
| C41 | C40 | C39 | 119.3(4) | F15 | C113 | F14 | 107.5(3)   |
| C40 | C41 | C42 | 119.4(4) | F16 | C114 | S6  | 112.0(3)   |
| N10 | C42 | C41 | 121.3(4) | F16 | C114 | F17 | 105.9(4)   |
| N10 | C42 | C43 | 119.5(3) | F16 | C114 | F18 | 108.2(4)   |
| C41 | C42 | C43 | 119.2(3) | F17 | C114 | S6  | 110.5(3)   |
| N9  | C44 | C45 | 112.2(3) | F18 | C114 | S6  | 111.4(3)   |
| N11 | C45 | C44 | 110.7(3) | F18 | C114 | F17 | 108.6(3)   |
| N11 | C46 | C47 | 111.4(3) | F19 | C115 | S7  | 111.8(3)   |
| N12 | C47 | C46 | 116.6(3) | F19 | C115 | F21 | 107.1(3)   |
| N12 | C47 | C48 | 123.0(4) | F20 | C115 | S7  | 111.3(3)   |
| C48 | C47 | C46 | 120.2(3) | F20 | C115 | F19 | 108.0(3)   |

|      |     |      |            |     |      |      |          |
|------|-----|------|------------|-----|------|------|----------|
| C47  | C48 | C49  | 117.6(4)   | F20 | C115 | F21  | 107.2(3) |
| C50  | C49 | C48  | 120.1(4)   | F21 | C115 | S7   | 111.2(3) |
| C49  | C50 | C51  | 120.3(4)   | F22 | C116 | S8   | 113.2(3) |
| N12  | C51 | C50  | 120.1(4)   | F22 | C116 | F23  | 107.0(3) |
| N12  | C51 | C52  | 120.0(3)   | F22 | C116 | F24  | 107.5(3) |
| C50  | C51 | C52  | 119.9(4)   | F23 | C116 | S8   | 110.4(3) |
| N11  | C53 | C54  | 111.8(3)   | F24 | C116 | S8   | 112.2(3) |
| N7   | C54 | C53  | 109.7(3)   | F24 | C116 | F23  | 106.1(3) |
| N19  | Fe4 | N20  | 77.88(11)  | O25 | S9   | C117 | 102.7(2) |
| N19  | Fe4 | N21  | 78.68(11)  | O26 | S9   | O25  | 114.1(2) |
| N19  | Fe4 | N23  | 79.14(12)  | O26 | S9   | C117 | 101.6(2) |
| N19  | Fe4 | N24  | 158.01(12) | O27 | S9   | O25  | 115.1(2) |
| N20  | Fe4 | N21  | 156.56(11) | O27 | S9   | O26  | 116.9(2) |
| N20  | Fe4 | N23  | 98.05(11)  | O27 | S9   | C117 | 103.6(2) |
| N20  | Fe4 | N24  | 106.77(11) | F25 | C117 | S9   | 111.8(3) |
| N22  | Fe4 | N19  | 96.95(11)  | F25 | C117 | F26  | 106.4(4) |
| N22  | Fe4 | N20  | 105.26(11) | F25 | C117 | F27  | 109.0(4) |
| N22  | Fe4 | N21  | 77.27(11)  | F26 | C117 | S9   | 110.7(3) |
| N22  | Fe4 | N23  | 155.04(11) | F27 | C117 | S9   | 111.0(4) |
| N22  | Fe4 | N24  | 102.29(11) | F27 | C117 | F26  | 107.7(4) |
| N23  | Fe4 | N21  | 77.79(12)  | O28 | S10  | O29  | 112.7(3) |
| N23  | Fe4 | N24  | 78.93(11)  | O28 | S10  | C118 | 95.2(3)  |
| N24  | Fe4 | N21  | 95.17(11)  | O29 | S10  | C118 | 105.1(3) |
| C82  | N19 | Fe4  | 105.7(2)   | O30 | S10  | O28  | 123.1(4) |
| C82  | N19 | C108 | 110.7(3)   | O30 | S10  | O29  | 112.5(3) |
| C89  | N19 | Fe4  | 105.7(2)   | O30 | S10  | C118 | 104.5(3) |
| C89  | N19 | C82  | 111.0(3)   | F28 | C118 | S10  | 113.8(4) |
| C89  | N19 | C108 | 113.0(3)   | F28 | C118 | F30  | 99.4(5)  |
| C108 | N19 | Fe4  | 110.3(2)   | F29 | C118 | S10  | 116.1(4) |
| C83  | N20 | Fe4  | 112.1(2)   | F29 | C118 | F28  | 119.6(8) |
| C83  | N20 | C87  | 117.9(3)   | F29 | C118 | F30  | 100.7(5) |
| C87  | N20 | Fe4  | 129.9(2)   | F30 | C118 | S10  | 102.8(5) |

**Table S12.** Torsion Angles for Fe(MPT).

| A   | B   | C   | D   | Angle/°   | A   | B   | C    | D    | Angle/°   |
|-----|-----|-----|-----|-----------|-----|-----|------|------|-----------|
| Fe1 | N1  | C1  | C2  | -44.2(3)  | Fe4 | N20 | C87  | C88  | -4.7(5)   |
| Fe1 | N1  | C8  | C9  | 17.8(3)   | Fe4 | N21 | C90  | C89  | -15.9(4)  |
| Fe1 | N1  | C27 | C26 | 51.4(3)   | Fe4 | N21 | C91  | C92  | 43.5(3)   |
| Fe1 | N2  | C2  | C1  | -16.9(4)  | Fe4 | N21 | C98  | C99  | -48.8(3)  |
| Fe1 | N2  | C2  | C3  | 164.6(3)  | Fe4 | N22 | C92  | C91  | 7.6(4)    |
| Fe1 | N2  | C6  | C5  | -164.1(3) | Fe4 | N22 | C92  | C93  | -176.3(3) |
| Fe1 | N2  | C6  | C7  | 15.7(5)   | Fe4 | N22 | C96  | C95  | 175.7(3)  |
| Fe1 | N3  | C9  | C8  | 51.3(3)   | Fe4 | N22 | C96  | C97  | -6.5(5)   |
| Fe1 | N3  | C10 | C11 | -46.8(3)  | Fe4 | N23 | C99  | C98  | -15.6(4)  |
| Fe1 | N3  | C17 | C18 | 14.9(3)   | Fe4 | N23 | C100 | C101 | 49.3(3)   |
| Fe1 | N4  | C11 | C10 | -10.3(3)  | Fe4 | N23 | C107 | C108 | -51.6(3)  |
| Fe1 | N4  | C11 | C12 | 171.8(3)  | Fe4 | N24 | C101 | C100 | 22.4(4)   |
| Fe1 | N4  | C15 | C14 | -168.2(2) | Fe4 | N24 | C101 | C102 | -159.2(3) |
| Fe1 | N4  | C15 | C16 | 13.4(4)   | Fe4 | N24 | C105 | C104 | 155.3(3)  |
| Fe1 | N5  | C18 | C17 | 49.7(3)   | Fe4 | N24 | C105 | C106 | -26.3(5)  |
| Fe1 | N5  | C19 | C20 | -43.0(3)  | N19 | Fe4 | N20  | C83  | 11.7(2)   |
| Fe1 | N5  | C26 | C27 | 15.7(4)   | N19 | Fe4 | N20  | C87  | -165.5(3) |
| Fe1 | N6  | C20 | C19 | -5.5(4)   | N19 | Fe4 | N21  | C90  | -9.0(3)   |
| Fe1 | N6  | C20 | C21 | -179.5(3) | N19 | Fe4 | N21  | C91  | -130.2(2) |
| Fe1 | N6  | C24 | C23 | 178.5(3)  | N19 | Fe4 | N21  | C98  | 111.3(2)  |
| Fe1 | N6  | C24 | C25 | 0.0(5)    | N19 | Fe4 | N22  | C92  | 89.8(2)   |
| N1  | Fe1 | N2  | C2  | -6.3(2)   | N19 | Fe4 | N22  | C96  | -87.7(3)  |
| N1  | Fe1 | N2  | C6  | 163.0(3)  | N19 | Fe4 | N23  | C99  | -88.5(3)  |
| N1  | Fe1 | N3  | C9  | -31.3(2)  | N19 | Fe4 | N23  | C100 | 152.2(2)  |
| N1  | Fe1 | N3  | C10 | -149.2(2) | N19 | Fe4 | N23  | C107 | 33.6(2)   |
| N1  | Fe1 | N3  | C17 | 90.1(2)   | N19 | Fe4 | N24  | C101 | 8.7(4)    |
| N1  | Fe1 | N4  | C11 | -14.0(4)  | N19 | Fe4 | N24  | C105 | -152.2(3) |
| N1  | Fe1 | N4  | C15 | 158.3(3)  | N19 | C82 | C83  | N20  | -36.9(4)  |
| N1  | Fe1 | N5  | C18 | -110.9(2) | N19 | C82 | C83  | C84  | 147.9(3)  |
| N1  | Fe1 | N5  | C19 | 131.3(2)  | N19 | C89 | C90  | N21  | 46.0(5)   |
| N1  | Fe1 | N5  | C26 | 9.6(2)    | N20 | Fe4 | N19  | C82  | -29.5(2)  |
| N1  | Fe1 | N6  | C20 | -91.2(2)  | N20 | Fe4 | N19  | C89  | -147.3(2) |
| N1  | Fe1 | N6  | C24 | 89.6(3)   | N20 | Fe4 | N19  | C108 | 90.2(2)   |
| N1  | C1  | C2  | N2  | 43.2(4)   | N20 | Fe4 | N21  | C90  | -8.1(5)   |
| N1  | C1  | C2  | C3  | -138.3(3) | N20 | Fe4 | N21  | C91  | -129.3(3) |
| N1  | C8  | C9  | N3  | -46.6(4)  | N20 | Fe4 | N21  | C98  | 112.2(3)  |

|    |     |     |     |           |     |     |     |      |           |
|----|-----|-----|-----|-----------|-----|-----|-----|------|-----------|
| N2 | Fe1 | N1  | C1  | 27.5(2)   | N20 | Fe4 | N22 | C92  | 169.1(2)  |
| N2 | Fe1 | N1  | C8  | -92.6(2)  | N20 | Fe4 | N22 | C96  | -8.4(3)   |
| N2 | Fe1 | N1  | C27 | 145.8(2)  | N20 | Fe4 | N23 | C99  | -164.4(2) |
| N2 | Fe1 | N3  | C9  | 45.3(2)   | N20 | Fe4 | N23 | C100 | 76.3(2)   |
| N2 | Fe1 | N3  | C10 | -72.6(2)  | N20 | Fe4 | N23 | C107 | -42.3(2)  |
| N2 | Fe1 | N3  | C17 | 166.7(2)  | N20 | Fe4 | N24 | C101 | -90.6(2)  |
| N2 | Fe1 | N4  | C11 | 81.4(2)   | N20 | Fe4 | N24 | C105 | 108.6(3)  |
| N2 | Fe1 | N4  | C15 | -106.3(3) | N20 | C83 | C84 | C85  | -1.8(6)   |
| N2 | Fe1 | N5  | C18 | -113.7(3) | N21 | Fe4 | N19 | C82  | 150.2(2)  |
| N2 | Fe1 | N5  | C19 | 128.6(3)  | N21 | Fe4 | N19 | C89  | 32.4(2)   |
| N2 | Fe1 | N5  | C26 | 6.9(4)    | N21 | Fe4 | N19 | C108 | -90.1(2)  |
| N2 | Fe1 | N6  | C20 | -171.3(2) | N21 | Fe4 | N20 | C83  | 10.9(5)   |
| N2 | Fe1 | N6  | C24 | 9.5(3)    | N21 | Fe4 | N20 | C87  | -166.4(3) |
| N2 | C2  | C3  | C4  | 2.7(6)    | N21 | Fe4 | N22 | C92  | 13.1(2)   |
| N3 | Fe1 | N1  | C1  | 127.2(2)  | N21 | Fe4 | N22 | C96  | -164.4(3) |
| N3 | Fe1 | N1  | C8  | 7.2(2)    | N21 | Fe4 | N23 | C99  | -7.8(2)   |
| N3 | Fe1 | N1  | C27 | -114.4(2) | N21 | Fe4 | N23 | C100 | -127.2(2) |
| N3 | Fe1 | N2  | C2  | -82.4(2)  | N21 | Fe4 | N23 | C107 | 114.2(2)  |
| N3 | Fe1 | N2  | C6  | 86.9(3)   | N21 | Fe4 | N24 | C101 | 81.1(2)   |
| N3 | Fe1 | N4  | C11 | -12.4(2)  | N21 | Fe4 | N24 | C105 | -79.8(3)  |
| N3 | Fe1 | N4  | C15 | 159.9(3)  | N21 | C91 | C92 | N22  | -36.1(4)  |
| N3 | Fe1 | N5  | C18 | -31.3(2)  | N21 | C91 | C92 | C93  | 147.6(3)  |
| N3 | Fe1 | N5  | C19 | -149.1(2) | N21 | C98 | C99 | N23  | 43.4(4)   |
| N3 | Fe1 | N5  | C26 | 89.2(2)   | N22 | Fe4 | N19 | C82  | 74.7(2)   |
| N3 | Fe1 | N6  | C20 | -13.3(4)  | N22 | Fe4 | N19 | C89  | -43.1(2)  |
| N3 | Fe1 | N6  | C24 | 167.5(3)  | N22 | Fe4 | N19 | C108 | -165.6(2) |
| N3 | C10 | C11 | N4  | 40.1(4)   | N22 | Fe4 | N20 | C83  | -82.3(3)  |
| N3 | C10 | C11 | C12 | -142.0(3) | N22 | Fe4 | N20 | C87  | 100.5(3)  |
| N3 | C17 | C18 | N5  | -44.3(4)  | N22 | Fe4 | N21 | C90  | 90.9(3)   |
| N4 | Fe1 | N1  | C1  | 128.8(3)  | N22 | Fe4 | N21 | C91  | -30.3(2)  |
| N4 | Fe1 | N1  | C8  | 8.8(4)    | N22 | Fe4 | N21 | C98  | -148.8(2) |
| N4 | Fe1 | N1  | C27 | -112.8(3) | N22 | Fe4 | N23 | C99  | -5.4(4)   |
| N4 | Fe1 | N2  | C2  | -161.1(2) | N22 | Fe4 | N23 | C100 | -124.7(3) |
| N4 | Fe1 | N2  | C6  | 8.2(3)    | N22 | Fe4 | N23 | C107 | 116.7(3)  |
| N4 | Fe1 | N3  | C9  | 149.4(2)  | N22 | Fe4 | N24 | C101 | 159.1(2)  |
| N4 | Fe1 | N3  | C10 | 31.46(19) | N22 | Fe4 | N24 | C105 | -1.7(3)   |
| N4 | Fe1 | N3  | C17 | -89.2(2)  | N22 | C92 | C93 | C94  | -0.3(6)   |
| N4 | Fe1 | N5  | C18 | 44.6(2)   | N23 | Fe4 | N19 | C82  | -130.2(2) |

|    |     |     |     |           |     |      |      |      |           |
|----|-----|-----|-----|-----------|-----|------|------|------|-----------|
| N4 | Fe1 | N5  | C19 | -73.1(2)  | N23 | Fe4  | N19  | C89  | 111.9(2)  |
| N4 | Fe1 | N5  | C26 | 165.2(2)  | N23 | Fe4  | N19  | C108 | -10.5(2)  |
| N4 | Fe1 | N6  | C20 | 78.3(2)   | N23 | Fe4  | N20  | C83  | 88.7(3)   |
| N4 | Fe1 | N6  | C24 | -100.9(3) | N23 | Fe4  | N20  | C87  | -88.6(3)  |
| N4 | C11 | C12 | C13 | -1.5(5)   | N23 | Fe4  | N21  | C90  | -90.2(3)  |
| N5 | Fe1 | N1  | C1  | -151.4(2) | N23 | Fe4  | N21  | C91  | 148.6(2)  |
| N5 | Fe1 | N1  | C8  | 88.5(2)   | N23 | Fe4  | N21  | C98  | 30.2(2)   |
| N5 | Fe1 | N1  | C27 | -33.1(2)  | N23 | Fe4  | N22  | C92  | 10.6(4)   |
| N5 | Fe1 | N2  | C2  | -3.5(4)   | N23 | Fe4  | N22  | C96  | -166.8(3) |
| N5 | Fe1 | N2  | C6  | 165.8(3)  | N23 | Fe4  | N24  | C101 | 4.6(2)    |
| N5 | Fe1 | N3  | C9  | -112.3(2) | N23 | Fe4  | N24  | C105 | -156.2(3) |
| N5 | Fe1 | N3  | C10 | 129.8(2)  | N23 | C100 | C101 | N24  | -51.1(4)  |
| N5 | Fe1 | N3  | C17 | 9.1(2)    | N23 | C100 | C101 | C102 | 130.5(4)  |
| N5 | Fe1 | N4  | C11 | -90.2(2)  | N23 | C107 | C108 | N19  | 45.7(4)   |
| N5 | Fe1 | N4  | C15 | 82.1(3)   | N24 | Fe4  | N19  | C82  | -134.3(3) |
| N5 | Fe1 | N6  | C20 | -14.4(2)  | N24 | Fe4  | N19  | C89  | 107.9(3)  |
| N5 | Fe1 | N6  | C24 | 166.5(3)  | N24 | Fe4  | N19  | C108 | -14.6(4)  |
| N5 | C19 | C20 | N6  | 34.0(4)   | N24 | Fe4  | N20  | C83  | 169.5(2)  |
| N5 | C19 | C20 | C21 | -151.8(3) | N24 | Fe4  | N20  | C87  | -7.8(3)   |
| N5 | C26 | C27 | N1  | -46.2(4)  | N24 | Fe4  | N21  | C90  | -167.6(3) |
| N6 | Fe1 | N1  | C1  | -76.0(2)  | N24 | Fe4  | N21  | C91  | 71.2(2)   |
| N6 | Fe1 | N1  | C8  | 164.0(2)  | N24 | Fe4  | N21  | C98  | -47.3(2)  |
| N6 | Fe1 | N1  | C27 | 42.3(2)   | N24 | Fe4  | N22  | C92  | -79.5(2)  |
| N6 | Fe1 | N2  | C2  | 89.0(2)   | N24 | Fe4  | N22  | C96  | 103.0(3)  |
| N6 | Fe1 | N2  | C6  | -101.7(3) | N24 | Fe4  | N23  | C99  | 90.0(2)   |
| N6 | Fe1 | N3  | C9  | -113.3(3) | N24 | Fe4  | N23  | C100 | -29.4(2)  |
| N6 | Fe1 | N3  | C10 | 128.8(3)  | N24 | Fe4  | N23  | C107 | -148.0(2) |
| N6 | Fe1 | N3  | C17 | 8.1(4)    | N24 | C101 | C102 | C103 | -1.1(6)   |
| N6 | Fe1 | N4  | C11 | -168.6(2) | C82 | N19  | C89  | C90  | -165.4(3) |
| N6 | Fe1 | N4  | C15 | 3.7(3)    | C82 | N19  | C108 | C107 | 102.2(3)  |
| N6 | Fe1 | N5  | C18 | 148.2(2)  | C82 | C83  | C84  | C85  | 173.1(3)  |
| N6 | Fe1 | N5  | C19 | 30.5(2)   | C83 | N20  | C87  | C86  | 0.0(5)    |
| N6 | Fe1 | N5  | C26 | -91.2(2)  | C83 | N20  | C87  | C88  | 178.2(3)  |
| N6 | C20 | C21 | C22 | 0.5(6)    | C83 | C84  | C85  | C86  | -0.5(6)   |
| C1 | N1  | C8  | C9  | -99.3(3)  | C84 | C85  | C86  | C87  | 2.5(6)    |
| C1 | N1  | C27 | C26 | 165.3(3)  | C85 | C86  | C87  | N20  | -2.3(6)   |
| C1 | C2  | C3  | C4  | -175.7(4) | C85 | C86  | C87  | C88  | 179.6(4)  |
| C2 | N2  | C6  | C5  | 4.6(5)    | C87 | N20  | C83  | C82  | -173.0(3) |



|     |     |     |     |           |      |      |      |      |             |
|-----|-----|-----|-----|-----------|------|------|------|------|-------------|
| C2  | N2  | C6  | C7  | -175.6(3) | C87  | N20  | C83  | C84  | 2.1(5)      |
| C2  | C3  | C4  | C5  | 2.1(6)    | C89  | N19  | C82  | C83  | 157.2(3)    |
| C3  | C4  | C5  | C6  | -3.4(6)   | C89  | N19  | C108 | C107 | -132.5(3)   |
| C4  | C5  | C6  | N2  | 0.1(6)    | C90  | N21  | C91  | C92  | -76.5(4)    |
| C4  | C5  | C6  | C7  | -179.7(4) | C90  | N21  | C98  | C99  | 71.4(4)     |
| C6  | N2  | C2  | C1  | 172.5(3)  | C91  | N21  | C90  | C89  | 101.2(4)    |
| C6  | N2  | C2  | C3  | -6.0(5)   | C91  | N21  | C98  | C99  | -163.4(3)   |
| C8  | N1  | C1  | C2  | 76.8(4)   | C91  | C92  | C93  | C94  | 175.8(4)    |
| C8  | N1  | C27 | C26 | -70.2(4)  | C92  | N22  | C96  | C95  | -1.6(5)     |
| C9  | N3  | C10 | C11 | -161.8(3) | C92  | N22  | C96  | C97  | 176.1(3)    |
| C9  | N3  | C17 | C18 | 133.6(3)  | C92  | C93  | C94  | C95  | -0.8(6)     |
| C10 | N3  | C9  | C8  | 165.1(3)  | C93  | C94  | C95  | C96  | 0.6(6)      |
| C10 | N3  | C17 | C18 | -101.7(3) | C94  | C95  | C96  | N22  | 0.6(6)      |
| C10 | C11 | C12 | C13 | -179.3(3) | C94  | C95  | C96  | C97  | -177.2(4)   |
| C11 | N4  | C15 | C14 | 3.7(5)    | C96  | N22  | C92  | C91  | -174.7(3)   |
| C11 | N4  | C15 | C16 | -174.7(3) | C96  | N22  | C92  | C93  | 1.5(5)      |
| C11 | C12 | C13 | C14 | 2.5(5)    | C98  | N21  | C90  | C89  | -134.1(4)   |
| C12 | C13 | C14 | C15 | -0.5(5)   | C98  | N21  | C91  | C92  | 159.2(3)    |
| C13 | C14 | C15 | N4  | -2.7(5)   | C99  | N23  | C100 | C101 | -72.0(4)    |
| C13 | C14 | C15 | C16 | 175.6(3)  | C99  | N23  | C107 | C108 | 71.2(4)     |
| C15 | N4  | C11 | C10 | 176.3(3)  | C100 | N23  | C99  | C98  | 99.7(4)     |
| C15 | N4  | C11 | C12 | -1.6(5)   | C100 | N23  | C107 | C108 | -163.5(3)   |
| C17 | N3  | C9  | C8  | -69.8(4)  | C100 | C101 | C102 | C103 | 177.2(4)    |
| C17 | N3  | C10 | C11 | 73.3(3)   | C101 | N24  | C105 | C104 | -4.2(5)     |
| C18 | N5  | C19 | C20 | -157.0(3) | C101 | N24  | C105 | C106 | 174.3(3)    |
| C18 | N5  | C26 | C27 | 132.7(3)  | C101 | C102 | C103 | C104 | -1.7(6)     |
| C19 | N5  | C18 | C17 | 164.1(3)  | C102 | C103 | C104 | C105 | 1.5(6)      |
| C19 | N5  | C26 | C27 | -102.4(3) | C103 | C104 | C105 | N24  | 1.5(6)      |
| C19 | C20 | C21 | C22 | -173.4(4) | C103 | C104 | C105 | C106 | -176.9(4)   |
| C20 | N6  | C24 | C23 | -0.7(5)   | C105 | N24  | C101 | C100 | -174.4(3)   |
| C20 | N6  | C24 | C25 | -179.1(3) | C105 | N24  | C101 | C102 | 4.0(5)      |
| C20 | C21 | C22 | C23 | 0.1(6)    | C107 | N23  | C99  | C98  | -133.5(3)   |
| C21 | C22 | C23 | C24 | -1.0(7)   | C107 | N23  | C100 | C101 | 161.9(3)    |
| C22 | C23 | C24 | N6  | 1.3(6)    | C108 | N19  | C82  | C83  | -76.4(4)    |
| C22 | C23 | C24 | C25 | 179.7(4)  | C108 | N19  | C89  | C90  | 69.5(4)     |
| C24 | N6  | C20 | C19 | 173.8(3)  | S1   | Na1  | O4   | S2   | 56.18(18)   |
| C24 | N6  | C20 | C21 | -0.2(5)   | S1   | Na1  | O5   | S2   | -126.52(14) |
| C26 | N5  | C18 | C17 | -70.4(4)  | S1   | Na1  | O9   | S3   | -146.3(15)  |

|                 |           |     |     |      |     |             |
|-----------------|-----------|-----|-----|------|-----|-------------|
| C26 N5 C19 C20  | 77.8(4)   | S1  | Na1 | O12  | S4  | 132(4)      |
| C27 N1 C1 C2    | -157.7(3) | S2  | Na1 | O1   | S1  | 48.55(15)   |
| C27 N1 C8 C9    | 135.3(3)  | S2  | Na1 | O3   | S1  | -127.44(14) |
| Fe3 N13 C55 C56 | 47.8(3)   | S2  | Na1 | O9   | S3  | -44.0(16)   |
| Fe3 N13 C62 C63 | 15.8(4)   | S2  | Na1 | O12  | S4  | 8(4)        |
| Fe3 N13 C81 C80 | 52.3(3)   | Na1 | S1  | C109 | F1  | -113.6(3)   |
| Fe3 N14 C56 C55 | -5.9(4)   | Na1 | S1  | C109 | F2  | 5.5(4)      |
| Fe3 N14 C56 C57 | 172.3(3)  | Na1 | S1  | C109 | F3  | 125.5(3)    |
| Fe3 N14 C60 C59 | -171.1(3) | Na1 | S2  | C110 | F4  | 115.6(2)    |
| Fe3 N14 C60 C61 | 8.7(5)    | Na1 | S2  | C110 | F5  | -4.2(4)     |
| Fe3 N15 C63 C62 | 52.0(3)   | Na1 | S2  | C110 | F6  | -124.5(3)   |
| Fe3 N15 C64 C65 | 47.6(3)   | O1  | S1  | Na1  | S2  | -138.42(14) |
| Fe3 N15 C71 C72 | 16.6(4)   | O1  | S1  | Na1  | O3  | 168.8(2)    |
| Fe3 N16 C65 C64 | -6.5(4)   | O1  | S1  | Na1  | O4  | -160.56(17) |
| Fe3 N16 C65 C66 | 174.4(3)  | O1  | S1  | Na1  | O5  | -116.55(15) |
| Fe3 N16 C69 C68 | -175.6(2) | O1  | S1  | Na1  | O9  | -39.74(19)  |
| Fe3 N16 C69 C70 | 3.9(5)    | O1  | S1  | Na1  | O12 | 78.4(2)     |
| Fe3 N17 C72 C71 | 52.5(3)   | O1  | S1  | O3   | Na1 | -10.39(19)  |
| Fe3 N17 C73 C74 | 46.8(3)   | O1  | S1  | C109 | F1  | -173.7(3)   |
| Fe3 N17 C80 C81 | 14.8(4)   | O1  | S1  | C109 | F2  | -54.6(3)    |
| Fe3 N18 C74 C73 | 5.4(4)    | O1  | S1  | C109 | F3  | 65.4(3)     |
| Fe3 N18 C74 C75 | -175.9(3) | O1  | Na1 | O3   | S1  | 6.39(12)    |
| Fe3 N18 C78 C77 | 175.8(3)  | O1  | Na1 | O4   | S2  | 41.9(3)     |
| Fe3 N18 C78 C79 | -3.9(5)   | O1  | Na1 | O5   | S2  | -151.37(14) |
| N13 Fe3 N14 C56 | 24.9(2)   | O1  | Na1 | O9   | S3  | -163.8(15)  |
| N13 Fe3 N14 C60 | -161.8(3) | O1  | Na1 | O12  | S4  | 160(4)      |
| N13 Fe3 N15 C63 | -32.5(2)  | O2  | S1  | Na1  | S2  | -42.51(17)  |
| N13 Fe3 N15 C64 | -150.2(2) | O2  | S1  | Na1  | O1  | 95.9(2)     |
| N13 Fe3 N15 C71 | 88.3(3)   | O2  | S1  | Na1  | O3  | -95.3(2)    |
| N13 Fe3 N16 C65 | 97.4(2)   | O2  | S1  | Na1  | O4  | -64.66(19)  |
| N13 Fe3 N16 C69 | -86.5(3)  | O2  | S1  | Na1  | O5  | -20.65(18)  |
| N13 Fe3 N17 C72 | -112.5(2) | O2  | S1  | Na1  | O9  | 56.2(2)     |
| N13 Fe3 N17 C73 | 131.5(2)  | O2  | S1  | Na1  | O12 | 174.3(2)    |
| N13 Fe3 N17 C80 | 10.1(2)   | O2  | S1  | O1   | Na1 | -126.79(15) |
| N13 Fe3 N18 C74 | -13.9(4)  | O2  | S1  | O3   | Na1 | 126.32(15)  |
| N13 Fe3 N18 C78 | 168.3(3)  | O2  | S1  | C109 | F1  | 66.0(3)     |
| N13 C55 C56 N14 | -28.2(5)  | O2  | S1  | C109 | F2  | -174.8(3)   |
| N13 C55 C56 C57 | 153.5(4)  | O2  | S1  | C109 | F3  | -54.8(3)    |

|                 |           |    |     |      |     |             |
|-----------------|-----------|----|-----|------|-----|-------------|
| N13 C62 C63 N15 | -46.5(4)  | O3 | S1  | Na1  | S2  | 52.83(15)   |
| N14 Fe3 N13 C55 | -38.2(2)  | O3 | S1  | Na1  | O1  | -168.8(2)   |
| N14 Fe3 N13 C62 | -159.6(3) | O3 | S1  | Na1  | O4  | 30.69(17)   |
| N14 Fe3 N13 C81 | 79.1(2)   | O3 | S1  | Na1  | O5  | 74.69(16)   |
| N14 Fe3 N15 C63 | -11.0(3)  | O3 | S1  | Na1  | O9  | 151.5(2)    |
| N14 Fe3 N15 C64 | -128.8(2) | O3 | S1  | Na1  | O12 | -90.4(2)    |
| N14 Fe3 N15 C71 | 109.7(3)  | O3 | S1  | O1   | Na1 | 10.19(19)   |
| N14 Fe3 N16 C65 | 175.1(2)  | O3 | S1  | C109 | F1  | -55.1(4)    |
| N14 Fe3 N16 C69 | -8.8(3)   | O3 | S1  | C109 | F2  | 64.0(3)     |
| N14 Fe3 N17 C72 | 178.1(2)  | O3 | S1  | C109 | F3  | -176.0(3)   |
| N14 Fe3 N17 C73 | 62.1(2)   | O3 | Na1 | O1   | S1  | -6.30(12)   |
| N14 Fe3 N17 C80 | -59.3(3)  | O3 | Na1 | O4   | S2  | 69.80(17)   |
| N14 Fe3 N18 C74 | -88.6(2)  | O3 | Na1 | O5   | S2  | -99.30(15)  |
| N14 Fe3 N18 C78 | 93.7(3)   | O3 | Na1 | O9   | S3  | -124.9(15)  |
| N14 C56 C57 C58 | 0.6(7)    | O3 | Na1 | O12  | S4  | 104(4)      |
| N15 Fe3 N13 C55 | 131.0(2)  | O4 | S2  | Na1  | S1  | -130.53(17) |
| N15 Fe3 N13 C62 | 9.7(2)    | O4 | S2  | Na1  | O1  | -151.31(19) |
| N15 Fe3 N13 C81 | -111.6(2) | O4 | S2  | Na1  | O3  | -108.75(18) |
| N15 Fe3 N14 C56 | 3.1(4)    | O4 | S2  | Na1  | O5  | 175.6(2)    |
| N15 Fe3 N14 C60 | 176.4(3)  | O4 | S2  | Na1  | O9  | 108.2(2)    |
| N15 Fe3 N16 C65 | 25.3(2)   | O4 | S2  | Na1  | O12 | -2.2(3)     |
| N15 Fe3 N16 C69 | -158.6(3) | O4 | S2  | O5   | Na1 | -3.64(19)   |
| N15 Fe3 N17 C72 | -32.0(2)  | O4 | S2  | C110 | F4  | 64.1(3)     |
| N15 Fe3 N17 C73 | -148.0(2) | O4 | S2  | C110 | F5  | -55.8(4)    |
| N15 Fe3 N17 C80 | 90.6(3)   | O4 | S2  | C110 | F6  | -176.1(3)   |
| N15 Fe3 N18 C74 | 87.2(3)   | O4 | Na1 | O1   | S1  | 28.6(2)     |
| N15 Fe3 N18 C78 | -90.6(3)  | O4 | Na1 | O3   | S1  | -152.54(15) |
| N15 C64 C65 N16 | -28.5(4)  | O4 | Na1 | O5   | S2  | 2.43(13)    |
| N15 C64 C65 C66 | 150.7(3)  | O4 | Na1 | O9   | S3  | -18.4(16)   |
| N15 C71 C72 N17 | -46.8(4)  | O4 | Na1 | O12  | S4  | 7(4)        |
| N16 Fe3 N13 C55 | 61.5(2)   | O5 | S2  | Na1  | S1  | 53.84(14)   |
| N16 Fe3 N13 C62 | -59.9(3)  | O5 | S2  | Na1  | O1  | 33.06(16)   |
| N16 Fe3 N13 C81 | 178.8(2)  | O5 | S2  | Na1  | O3  | 75.62(16)   |
| N16 Fe3 N14 C56 | -79.4(2)  | O5 | S2  | Na1  | O4  | -175.6(2)   |
| N16 Fe3 N14 C60 | 93.9(3)   | O5 | S2  | Na1  | O9  | -67.40(18)  |
| N16 Fe3 N15 C63 | 79.2(2)   | O5 | S2  | Na1  | O12 | -177.8(2)   |
| N16 Fe3 N15 C64 | -38.6(2)  | O5 | S2  | O4   | Na1 | 4.2(2)      |
| N16 Fe3 N15 C71 | -160.1(3) | O5 | S2  | C110 | F4  | -177.9(3)   |

|         |     |     |           |     |     |      |     |             |
|---------|-----|-----|-----------|-----|-----|------|-----|-------------|
| N16 Fe3 | N17 | C72 | -10.3(4)  | O5  | S2  | C110 | F5  | 62.3(3)     |
| N16 Fe3 | N17 | C73 | -126.3(3) | O5  | S2  | C110 | F6  | -58.0(4)    |
| N16 Fe3 | N17 | C80 | 112.3(3)  | O5  | Na1 | O1   | S1  | 63.07(14)   |
| N16 Fe3 | N18 | C74 | 165.2(2)  | O5  | Na1 | O3   | S1  | -100.33(15) |
| N16 Fe3 | N18 | C78 | -12.5(3)  | O5  | Na1 | O4   | S2  | -2.48(13)   |
| N16 C65 | C66 | C67 | 2.4(5)    | O5  | Na1 | O9   | S3  | -69.3(16)   |
| N17 Fe3 | N13 | C55 | -149.5(2) | O5  | Na1 | O12  | S4  | 4(4)        |
| N17 Fe3 | N13 | C62 | 89.1(3)   | O6  | S2  | Na1  | S1  | -45.3(2)    |
| N17 Fe3 | N13 | C81 | -32.1(2)  | O6  | S2  | Na1  | O1  | -66.0(2)    |
| N17 Fe3 | N14 | C56 | 96.3(2)   | O6  | S2  | Na1  | O3  | -23.5(2)    |
| N17 Fe3 | N14 | C60 | -90.4(3)  | O6  | S2  | Na1  | O4  | 85.3(3)     |
| N17 Fe3 | N15 | C63 | -111.9(2) | O6  | S2  | Na1  | O5  | -99.1(3)    |
| N17 Fe3 | N15 | C64 | 130.3(2)  | O6  | S2  | Na1  | O9  | -166.5(2)   |
| N17 Fe3 | N15 | C71 | 8.8(2)    | O6  | S2  | Na1  | O12 | 83.1(3)     |
| N17 Fe3 | N16 | C65 | 3.4(4)    | O6  | S2  | O4   | Na1 | -131.77(18) |
| N17 Fe3 | N16 | C69 | 179.5(3)  | O6  | S2  | O5   | Na1 | 132.20(19)  |
| N17 Fe3 | N18 | C74 | 16.2(2)   | O6  | S2  | C110 | F4  | -56.4(3)    |
| N17 Fe3 | N18 | C78 | -161.5(3) | O6  | S2  | C110 | F5  | -176.3(3)   |
| N17 C73 | C74 | N18 | -36.9(5)  | O6  | S2  | C110 | F6  | 63.5(4)     |
| N17 C73 | C74 | C75 | 144.3(4)  | O7  | S3  | O9   | Na1 | 116.2(15)   |
| N17 C80 | C81 | N13 | -45.2(4)  | O7  | S3  | C111 | F7  | -176.5(3)   |
| N18 Fe3 | N13 | C55 | -119.4(3) | O7  | S3  | C111 | F8  | -59.1(3)    |
| N18 Fe3 | N13 | C62 | 119.2(3)  | O7  | S3  | C111 | F9  | 60.7(4)     |
| N18 Fe3 | N13 | C81 | -2.1(4)   | O8  | S3  | O9   | Na1 | -23.1(16)   |
| N18 Fe3 | N14 | C56 | 174.9(2)  | O8  | S3  | C111 | F7  | -56.5(4)    |
| N18 Fe3 | N14 | C60 | -11.7(3)  | O8  | S3  | C111 | F8  | 60.9(3)     |
| N18 Fe3 | N15 | C63 | 177.5(2)  | O8  | S3  | C111 | F9  | -179.3(3)   |
| N18 Fe3 | N15 | C64 | 59.8(2)   | O9  | S3  | C111 | F7  | 63.5(4)     |
| N18 Fe3 | N15 | C71 | -61.7(3)  | O9  | S3  | C111 | F8  | -179.1(3)   |
| N18 Fe3 | N16 | C65 | -82.1(2)  | O9  | S3  | C111 | F9  | -59.3(4)    |
| N18 Fe3 | N16 | C69 | 94.0(3)   | O9  | Na1 | O1   | S1  | 146.13(16)  |
| N18 Fe3 | N17 | C72 | 82.4(2)   | O9  | Na1 | O3   | S1  | -43.0(3)    |
| N18 Fe3 | N17 | C73 | -33.6(2)  | O9  | Na1 | O4   | S2  | -74.8(2)    |
| N18 Fe3 | N17 | C80 | -155.0(3) | O9  | Na1 | O5   | S2  | 111.53(17)  |
| N18 C74 | C75 | C76 | -0.8(6)   | O9  | Na1 | O12  | S4  | -99(4)      |
| C55 N13 | C62 | C63 | -102.8(4) | O10 | S4  | O12  | Na1 | 126(4)      |
| C55 N13 | C81 | C80 | 166.4(3)  | O10 | S4  | C112 | F10 | -177.3(4)   |
| C55 C56 | C57 | C58 | 178.8(4)  | O10 | S4  | C112 | F11 | 62.5(4)     |

|             |     |           |      |     |          |             |
|-------------|-----|-----------|------|-----|----------|-------------|
| C56 N14 C60 | C59 | 1.8(6)    | O10  | S4  | C112 F12 | -52.2(4)    |
| C56 N14 C60 | C61 | -178.5(3) | O11  | S4  | O12 Na1  | -12(4)      |
| C56 C57 C58 | C59 | 1.2(8)    | O11  | S4  | C112 F10 | -59.8(4)    |
| C57 C58 C59 | C60 | -1.5(8)   | O11  | S4  | C112 F11 | -179.9(4)   |
| C58 C59 C60 | N14 | 0.0(7)    | O11  | S4  | C112 F12 | 65.4(4)     |
| C58 C59 C60 | C61 | -179.7(5) | O12  | S4  | C112 F10 | 57.8(5)     |
| C60 N14 C56 | C55 | 179.7(3)  | O12  | S4  | C112 F11 | -62.4(5)    |
| C60 N14 C56 | C57 | -2.1(6)   | O12  | S4  | C112 F12 | -177.1(5)   |
| C62 N13 C55 | C56 | 170.6(3)  | O12  | Na1 | O1 S1    | -109.3(2)   |
| C62 N13 C81 | C80 | -70.3(4)  | O12  | Na1 | O3 S1    | 98.9(2)     |
| C63 N15 C64 | C65 | -64.7(4)  | O12  | Na1 | O4 S2    | 178.37(19)  |
| C63 N15 C71 | C72 | 133.4(3)  | O12  | Na1 | O5 S2    | 4.9(6)      |
| C64 N15 C63 | C62 | 165.0(3)  | O12  | Na1 | O9 S3    | 92.2(16)    |
| C64 N15 C71 | C72 | -101.6(4) | C109 | S1  | Na1 S2   | 137.02(17)  |
| C64 C65 C66 | C67 | -176.7(3) | C109 | S1  | Na1 O1   | -84.6(2)    |
| C65 N16 C69 | C68 | 0.3(5)    | C109 | S1  | Na1 O3   | 84.2(2)     |
| C65 N16 C69 | C70 | 179.7(3)  | C109 | S1  | Na1 O4   | 114.88(19)  |
| C65 C66 C67 | C68 | -0.6(5)   | C109 | S1  | Na1 O5   | 158.89(17)  |
| C66 C67 C68 | C69 | -1.3(5)   | C109 | S1  | Na1 O9   | -124.3(2)   |
| C67 C68 C69 | N16 | 1.5(5)    | C109 | S1  | Na1 O12  | -6.2(3)     |
| C67 C68 C69 | C70 | -178.0(3) | C109 | S1  | O1 Na1   | 121.75(17)  |
| C69 N16 C65 | C64 | 176.9(3)  | C109 | S1  | O3 Na1   | -121.57(16) |
| C69 N16 C65 | C66 | -2.3(5)   | C110 | S2  | Na1 S1   | 146.27(17)  |
| C71 N15 C63 | C62 | -70.4(4)  | C110 | S2  | Na1 O1   | 125.49(19)  |
| C71 N15 C64 | C65 | 170.7(3)  | C110 | S2  | Na1 O3   | 168.05(18)  |
| C72 N17 C73 | C74 | -65.5(4)  | C110 | S2  | Na1 O4   | -83.2(2)    |
| C72 N17 C80 | C81 | 133.2(3)  | C110 | S2  | Na1 O5   | 92.4(2)     |
| C73 N17 C72 | C71 | 164.6(3)  | C110 | S2  | Na1 O9   | 25.0(2)     |
| C73 N17 C80 | C81 | -102.6(4) | C110 | S2  | Na1 O12  | -85.4(3)    |
| C73 C74 C75 | C76 | 177.9(4)  | C110 | S2  | O4 Na1   | 116.53(18)  |
| C74 N18 C78 | C77 | -1.8(5)   | C110 | S2  | O5 Na1   | -115.00(15) |
| C74 N18 C78 | C79 | 178.5(3)  | C111 | S3  | O9 Na1   | -133.8(15)  |
| C74 C75 C76 | C77 | -1.0(6)   | C112 | S4  | O12 Na1  | -118(4)     |
| C75 C76 C77 | C78 | 1.3(6)    | S5   | Na2 | O18 S6   | 30.4(6)     |
| C76 C77 C78 | N18 | 0.1(6)    | S5   | Na2 | O19 S7   | 124.11(14)  |
| C76 C77 C78 | C79 | 179.8(4)  | S5   | Na2 | O20 S7   | -53.20(16)  |
| C78 N18 C74 | C73 | -176.6(3) | S5   | Na2 | O24 S8   | 111.6(8)    |
| C78 N18 C74 | C75 | 2.2(5)    | S7   | Na2 | O13 S5   | -44.13(16)  |

|             |     |           |     |     |      |     |             |
|-------------|-----|-----------|-----|-----|------|-----|-------------|
| C80 N17 C72 | C71 | -70.5(4)  | S7  | Na2 | O15  | S5  | 129.71(13)  |
| C80 N17 C73 | C74 | 169.1(3)  | S7  | Na2 | O18  | S6  | -81.9(5)    |
| C81 N13 C55 | C56 | -65.9(4)  | S7  | Na2 | O24  | S8  | -140.1(7)   |
| C81 N13 C62 | C63 | 133.9(3)  | Na2 | S5  | C113 | F13 | -121.3(2)   |
| Fe2 N7 C28  | C29 | -48.6(3)  | Na2 | S5  | C113 | F14 | 120.0(3)    |
| Fe2 N7 C35  | C36 | 16.2(4)   | Na2 | S5  | C113 | F15 | -0.7(4)     |
| Fe2 N7 C54  | C53 | 51.5(3)   | Na2 | S7  | C115 | F19 | 1.6(3)      |
| Fe2 N8 C29  | C28 | -16.8(4)  | Na2 | S7  | C115 | F20 | 122.5(2)    |
| Fe2 N8 C29  | C30 | 164.7(3)  | Na2 | S7  | C115 | F21 | -118.1(2)   |
| Fe2 N8 C33  | C32 | -162.2(3) | O13 | S5  | Na2  | S7  | 140.87(15)  |
| Fe2 N8 C33  | C34 | 19.5(5)   | O13 | S5  | Na2  | O15 | -170.4(2)   |
| Fe2 N9 C36  | C35 | 50.1(3)   | O13 | S5  | Na2  | O18 | 21.02(19)   |
| Fe2 N9 C37  | C38 | -46.2(3)  | O13 | S5  | Na2  | O19 | 118.35(16)  |
| Fe2 N9 C44  | C45 | 14.0(4)   | O13 | S5  | Na2  | O20 | 162.27(17)  |
| Fe2 N10 C38 | C37 | -9.8(4)   | O13 | S5  | Na2  | O24 | -92.98(18)  |
| Fe2 N10 C38 | C39 | 175.8(3)  | O13 | S5  | O15  | Na2 | 8.04(16)    |
| Fe2 N10 C42 | C41 | -176.5(3) | O13 | S5  | C113 | F13 | -70.3(3)    |
| Fe2 N10 C42 | C43 | 5.5(5)    | O13 | S5  | C113 | F14 | 170.9(3)    |
| Fe2 N11 C45 | C44 | 51.9(3)   | O13 | S5  | C113 | F15 | 50.2(3)     |
| Fe2 N11 C46 | C47 | -43.5(3)  | O13 | Na2 | O15  | S5  | -5.38(11)   |
| Fe2 N11 C53 | C54 | 18.2(4)   | O13 | Na2 | O18  | S6  | 39.9(5)     |
| Fe2 N12 C47 | C46 | -10.1(4)  | O13 | Na2 | O19  | S7  | 147.78(15)  |
| Fe2 N12 C47 | C48 | 175.5(3)  | O13 | Na2 | O20  | S7  | -41.3(2)    |
| Fe2 N12 C51 | C50 | -176.8(3) | O13 | Na2 | O24  | S8  | 83.1(8)     |
| Fe2 N12 C51 | C52 | 3.3(5)    | O14 | S5  | Na2  | S7  | 53.43(16)   |
| N7 Fe2 N8   | C29 | -8.5(2)   | O14 | S5  | Na2  | O13 | -87.4(2)    |
| N7 Fe2 N8   | C33 | 157.8(3)  | O14 | S5  | Na2  | O15 | 102.2(2)    |
| N7 Fe2 N9   | C36 | -31.0(2)  | O14 | S5  | Na2  | O18 | -66.4(2)    |
| N7 Fe2 N9   | C37 | -148.6(2) | O14 | S5  | Na2  | O19 | 30.91(17)   |
| N7 Fe2 N9   | C44 | 90.7(3)   | O14 | S5  | Na2  | O20 | 74.82(18)   |
| N7 Fe2 N10  | C38 | -12.3(4)  | O14 | S5  | Na2  | O24 | 179.58(19)  |
| N7 Fe2 N10  | C42 | 163.9(3)  | O14 | S5  | O13  | Na2 | 127.56(15)  |
| N7 Fe2 N11  | C45 | -113.9(2) | O14 | S5  | O15  | Na2 | -128.41(14) |
| N7 Fe2 N11  | C46 | 129.2(2)  | O14 | S5  | C113 | F13 | 50.0(3)     |
| N7 Fe2 N11  | C53 | 7.3(2)    | O14 | S5  | C113 | F14 | -68.8(3)    |
| N7 Fe2 N12  | C47 | -87.0(2)  | O14 | S5  | C113 | F15 | 170.5(3)    |
| N7 Fe2 N12  | C51 | 91.5(3)   | O15 | S5  | Na2  | S7  | -48.77(13)  |
| N7 C28 C29  | N8  | 46.2(4)   | O15 | S5  | Na2  | O13 | 170.4(2)    |

|     |     |     |     |           |     |     |      |     |             |
|-----|-----|-----|-----|-----------|-----|-----|------|-----|-------------|
| N7  | C28 | C29 | C30 | -135.3(4) | O15 | S5  | Na2  | O18 | -168.62(19) |
| N7  | C35 | C36 | N9  | -45.0(4)  | O15 | S5  | Na2  | O19 | -71.29(15)  |
| N8  | Fe2 | N7  | C28 | 30.6(2)   | O15 | S5  | Na2  | O20 | -27.38(15)  |
| N8  | Fe2 | N7  | C35 | -89.4(2)  | O15 | S5  | Na2  | O24 | 77.38(18)   |
| N8  | Fe2 | N7  | C54 | 149.5(2)  | O15 | S5  | O13  | Na2 | -9.44(19)   |
| N8  | Fe2 | N9  | C36 | 45.3(2)   | O15 | S5  | C113 | F13 | 171.5(3)    |
| N8  | Fe2 | N9  | C37 | -72.3(2)  | O15 | S5  | C113 | F14 | 52.7(3)     |
| N8  | Fe2 | N9  | C44 | 167.0(2)  | O15 | S5  | C113 | F15 | -67.9(3)    |
| N8  | Fe2 | N10 | C38 | 79.5(2)   | O15 | Na2 | O13  | S5  | 5.47(11)    |
| N8  | Fe2 | N10 | C42 | -104.3(3) | O15 | Na2 | O18  | S6  | 19.4(7)     |
| N8  | Fe2 | N11 | C45 | -111.4(3) | O15 | Na2 | O19  | S7  | 96.62(15)   |
| N8  | Fe2 | N11 | C46 | 131.8(3)  | O15 | Na2 | O20  | S7  | -65.50(15)  |
| N8  | Fe2 | N11 | C53 | 9.9(4)    | O15 | Na2 | O24  | S8  | 139.0(8)    |
| N8  | Fe2 | N12 | C47 | -166.1(2) | O16 | S6  | O18  | Na2 | -22.9(6)    |
| N8  | Fe2 | N12 | C51 | 12.4(3)   | O16 | S6  | C114 | F16 | -62.4(4)    |
| N8  | C29 | C30 | C31 | 1.0(6)    | O16 | S6  | C114 | F17 | 55.5(3)     |
| N9  | Fe2 | N7  | C28 | 128.4(2)  | O16 | S6  | C114 | F18 | 176.3(3)    |
| N9  | Fe2 | N7  | C35 | 8.4(2)    | O17 | S6  | O18  | Na2 | -160.5(5)   |
| N9  | Fe2 | N7  | C54 | -112.7(2) | O17 | S6  | C114 | F16 | 59.4(4)     |
| N9  | Fe2 | N8  | C29 | -85.6(2)  | O17 | S6  | C114 | F17 | 177.3(3)    |
| N9  | Fe2 | N8  | C33 | 80.7(3)   | O17 | S6  | C114 | F18 | -61.9(4)    |
| N9  | Fe2 | N10 | C38 | -12.6(2)  | O18 | S6  | C114 | F16 | 177.2(3)    |
| N9  | Fe2 | N10 | C42 | 163.6(3)  | O18 | S6  | C114 | F17 | -65.0(3)    |
| N9  | Fe2 | N11 | C45 | -33.4(2)  | O18 | S6  | C114 | F18 | 55.8(4)     |
| N9  | Fe2 | N11 | C46 | -150.3(2) | O18 | Na2 | O13  | S5  | -162.63(15) |
| N9  | Fe2 | N11 | C53 | 87.9(3)   | O18 | Na2 | O15  | S5  | 19.8(3)     |
| N9  | Fe2 | N12 | C47 | -9.8(4)   | O18 | Na2 | O19  | S7  | -112.40(16) |
| N9  | Fe2 | N12 | C51 | 168.8(3)  | O18 | Na2 | O20  | S7  | 93.05(17)   |
| N9  | C37 | C38 | N10 | 39.5(5)   | O18 | Na2 | O24  | S8  | -19.0(8)    |
| N9  | C37 | C38 | C39 | -146.0(4) | O19 | S7  | Na2  | S5  | -54.72(15)  |
| N9  | C44 | C45 | N11 | -45.6(4)  | O19 | S7  | Na2  | O13 | -36.15(17)  |
| N10 | Fe2 | N7  | C28 | 128.1(3)  | O19 | S7  | Na2  | O15 | -75.67(16)  |
| N10 | Fe2 | N7  | C35 | 8.1(4)    | O19 | S7  | Na2  | O18 | 75.49(18)   |
| N10 | Fe2 | N7  | C54 | -113.0(3) | O19 | S7  | Na2  | O20 | 173.3(2)    |
| N10 | Fe2 | N8  | C29 | -164.3(2) | O19 | S7  | Na2  | O24 | -169.8(2)   |
| N10 | Fe2 | N8  | C33 | 2.0(3)    | O19 | S7  | O20  | Na2 | -6.4(2)     |
| N10 | Fe2 | N9  | C36 | 148.9(3)  | O19 | S7  | C115 | F19 | -63.0(3)    |
| N10 | Fe2 | N9  | C37 | 31.3(2)   | O19 | S7  | C115 | F20 | 57.9(3)     |

|             |     |           |         |          |             |
|-------------|-----|-----------|---------|----------|-------------|
| N10 Fe2 N9  | C44 | -89.4(3)  | O19 S7  | C115 F21 | 177.3(3)    |
| N10 Fe2 N11 | C45 | 42.5(2)   | O19 Na2 | O13 S5   | -59.91(14)  |
| N10 Fe2 N11 | C46 | -74.3(2)  | O19 Na2 | O15 S5   | 101.68(14)  |
| N10 Fe2 N11 | C53 | 163.8(2)  | O19 Na2 | O18 S6   | -54.7(5)    |
| N10 Fe2 N12 | C47 | 83.7(3)   | O19 Na2 | O20 S7   | 3.79(12)    |
| N10 Fe2 N12 | C51 | -97.8(3)  | O19 Na2 | O24 S8   | -149.1(6)   |
| N10 C38 C39 | C40 | 1.1(6)    | O20 S7  | Na2 S5   | 131.97(16)  |
| N11 Fe2 N7  | C28 | -150.5(2) | O20 S7  | Na2 O13  | 150.54(18)  |
| N11 Fe2 N7  | C35 | 89.5(2)   | O20 S7  | Na2 O15  | 111.02(17)  |
| N11 Fe2 N7  | C54 | -31.6(2)  | O20 S7  | Na2 O18  | -97.82(18)  |
| N11 Fe2 N8  | C29 | -11.1(4)  | O20 S7  | Na2 O19  | -173.3(2)   |
| N11 Fe2 N8  | C33 | 155.2(3)  | O20 S7  | Na2 O24  | 16.8(2)     |
| N11 Fe2 N9  | C36 | -110.7(2) | O20 S7  | O19 Na2  | 5.72(19)    |
| N11 Fe2 N9  | C37 | 131.7(2)  | O20 S7  | C115 F19 | 55.2(3)     |
| N11 Fe2 N9  | C44 | 11.0(2)   | O20 S7  | C115 F20 | 176.1(3)    |
| N11 Fe2 N10 | C38 | -89.6(2)  | O20 S7  | C115 F21 | -64.5(3)    |
| N11 Fe2 N10 | C42 | 86.6(3)   | O20 Na2 | O13 S5   | -24.8(2)    |
| N11 Fe2 N12 | C47 | -11.1(2)  | O20 Na2 | O15 S5   | 154.80(14)  |
| N11 Fe2 N12 | C51 | 167.4(3)  | O20 Na2 | O18 S6   | -110.9(5)   |
| N11 C46 C47 | N12 | 37.7(4)   | O20 Na2 | O19 S7   | -3.73(12)   |
| N11 C46 C47 | C48 | -147.7(4) | O20 Na2 | O24 S8   | -132.5(8)   |
| N11 C53 C54 | N7  | -47.5(4)  | O21 S7  | Na2 S5   | 44.0(2)     |
| N12 Fe2 N7  | C28 | -74.9(2)  | O21 S7  | Na2 O13  | 62.6(2)     |
| N12 Fe2 N7  | C35 | 165.2(2)  | O21 S7  | Na2 O15  | 23.1(2)     |
| N12 Fe2 N7  | C54 | 44.0(2)   | O21 S7  | Na2 O18  | 174.2(2)    |
| N12 Fe2 N8  | C29 | 85.2(2)   | O21 S7  | Na2 O19  | 98.7(2)     |
| N12 Fe2 N8  | C33 | -108.5(3) | O21 S7  | Na2 O20  | -88.0(2)    |
| N12 Fe2 N9  | C36 | -112.0(3) | O21 S7  | Na2 O24  | -71.1(2)    |
| N12 Fe2 N9  | C37 | 130.3(3)  | O21 S7  | O19 Na2  | -130.58(16) |
| N12 Fe2 N9  | C44 | 9.6(4)    | O21 S7  | O20 Na2  | 130.21(16)  |
| N12 Fe2 N10 | C38 | -168.7(2) | O21 S7  | C115 F19 | 175.8(3)    |
| N12 Fe2 N10 | C42 | 7.5(3)    | O21 S7  | C115 F20 | -63.4(3)    |
| N12 Fe2 N11 | C45 | 146.0(2)  | O21 S7  | C115 F21 | 56.1(3)     |
| N12 Fe2 N11 | C46 | 29.2(2)   | O22 S8  | O24 Na2  | 1.4(9)      |
| N12 Fe2 N11 | C53 | -92.7(3)  | O22 S8  | C116 F22 | -56.2(3)    |
| N12 C47 C48 | C49 | 2.2(6)    | O22 S8  | C116 F23 | -176.2(3)   |
| C28 N7 C35  | C36 | -99.0(4)  | O22 S8  | C116 F24 | 65.6(3)     |
| C28 N7 C54  | C53 | 164.5(3)  | O23 S8  | O24 Na2  | 138.8(7)    |



|     |     |     |     |           |      |     |      |     |             |
|-----|-----|-----|-----|-----------|------|-----|------|-----|-------------|
| C28 | C29 | C30 | C31 | -177.4(4) | O23  | S8  | C116 | F22 | -177.1(3)   |
| C29 | N8  | C33 | C32 | 3.4(5)    | O23  | S8  | C116 | F23 | 62.9(3)     |
| C29 | N8  | C33 | C34 | -175.0(3) | O23  | S8  | C116 | F24 | -55.2(4)    |
| C29 | C30 | C31 | C32 | 1.1(7)    | O24  | S8  | C116 | F22 | 62.0(3)     |
| C30 | C31 | C32 | C33 | -1.0(7)   | O24  | S8  | C116 | F23 | -57.9(3)    |
| C31 | C32 | C33 | N8  | -1.3(6)   | O24  | S8  | C116 | F24 | -176.1(3)   |
| C31 | C32 | C33 | C34 | 177.0(4)  | O24  | Na2 | O13  | S5  | 95.91(17)   |
| C33 | N8  | C29 | C28 | 175.2(3)  | O24  | Na2 | O15  | S5  | -109.51(16) |
| C33 | N8  | C29 | C30 | -3.3(5)   | O24  | Na2 | O18  | S6  | 149.2(5)    |
| C35 | N7  | C28 | C29 | 70.8(4)   | O24  | Na2 | O19  | S7  | 16.8(3)     |
| C35 | N7  | C54 | C53 | -69.1(4)  | O24  | Na2 | O20  | S7  | -165.70(17) |
| C36 | N9  | C37 | C38 | -160.3(3) | C113 | S5  | Na2  | S7  | -138.44(16) |
| C36 | N9  | C44 | C45 | 132.3(3)  | C113 | S5  | Na2  | O13 | 80.7(2)     |
| C37 | N9  | C36 | C35 | 163.3(3)  | C113 | S5  | Na2  | O15 | -89.7(2)    |
| C37 | N9  | C44 | C45 | -102.3(4) | C113 | S5  | Na2  | O18 | 101.7(2)    |
| C37 | C38 | C39 | C40 | -173.1(4) | C113 | S5  | Na2  | O19 | -160.96(17) |
| C38 | N10 | C42 | C41 | -0.5(5)   | C113 | S5  | Na2  | O20 | -117.04(18) |
| C38 | N10 | C42 | C43 | -178.5(3) | C113 | S5  | Na2  | O24 | -12.3(2)    |
| C38 | C39 | C40 | C41 | 0.2(6)    | C113 | S5  | O13  | Na2 | -119.94(17) |
| C39 | C40 | C41 | C42 | -1.5(6)   | C113 | S5  | O15  | Na2 | 118.70(14)  |
| C40 | C41 | C42 | N10 | 1.7(6)    | C114 | S6  | O18  | Na2 | 89.0(5)     |
| C40 | C41 | C42 | C43 | 179.7(4)  | C115 | S7  | Na2  | S5  | -144.28(16) |
| C42 | N10 | C38 | C37 | 173.4(3)  | C115 | S7  | Na2  | O13 | -125.71(17) |
| C42 | N10 | C38 | C39 | -1.0(5)   | C115 | S7  | Na2  | O15 | -165.23(16) |
| C44 | N9  | C36 | C35 | -71.0(4)  | C115 | S7  | Na2  | O18 | -14.07(19)  |
| C44 | N9  | C37 | C38 | 74.0(4)   | C115 | S7  | Na2  | O19 | -89.6(2)    |
| C45 | N11 | C46 | C47 | -155.4(3) | C115 | S7  | Na2  | O20 | 83.8(2)     |
| C45 | N11 | C53 | C54 | 134.5(3)  | C115 | S7  | Na2  | O24 | 100.6(2)    |
| C46 | N11 | C45 | C44 | 165.0(3)  | C115 | S7  | O19  | Na2 | 117.00(15)  |
| C46 | N11 | C53 | C54 | -100.0(4) | C115 | S7  | O20  | Na2 | -117.62(16) |
| C46 | C47 | C48 | C49 | -172.0(4) | C116 | S8  | O24  | Na2 | -108.7(8)   |
| C47 | N12 | C51 | C50 | 1.7(5)    | O25  | S9  | C117 | F25 | -59.3(4)    |
| C47 | N12 | C51 | C52 | -178.3(3) | O25  | S9  | C117 | F26 | 59.2(4)     |
| C47 | C48 | C49 | C50 | 0.3(7)    | O25  | S9  | C117 | F27 | 178.8(3)    |
| C48 | C49 | C50 | C51 | -1.8(7)   | O26  | S9  | C117 | F25 | 59.0(4)     |
| C49 | C50 | C51 | N12 | 0.8(7)    | O26  | S9  | C117 | F26 | 177.5(3)    |
| C49 | C50 | C51 | C52 | -179.3(4) | O26  | S9  | C117 | F27 | -62.9(4)    |
| C51 | N12 | C47 | C46 | 171.2(3)  | O27  | S9  | C117 | F25 | -179.4(4)   |

|     |     |      |      |           |     |     |      |     |           |
|-----|-----|------|------|-----------|-----|-----|------|-----|-----------|
| C51 | N12 | C47  | C48  | -3.2(5)   | O27 | S9  | C117 | F26 | -60.9(4)  |
| C53 | N11 | C45  | C44  | -68.9(4)  | O27 | S9  | C117 | F27 | 58.7(4)   |
| C53 | N11 | C46  | C47  | 78.3(4)   | O28 | S10 | C118 | F28 | -74.1(7)  |
| C54 | N7  | C28  | C29  | -162.8(3) | O28 | S10 | C118 | F29 | 70.6(6)   |
| C54 | N7  | C35  | C36  | 134.0(3)  | O28 | S10 | C118 | F30 | 179.5(4)  |
| Fe4 | N19 | C82  | C83  | 43.0(3)   | O29 | S10 | C118 | F28 | 41.0(7)   |
| Fe4 | N19 | C89  | C90  | -51.2(3)  | O29 | S10 | C118 | F29 | -174.2(6) |
| Fe4 | N19 | C108 | C107 | -14.4(4)  | O29 | S10 | C118 | F30 | -65.3(4)  |
| Fe4 | N20 | C83  | C82  | 9.4(4)    | O30 | S10 | C118 | F28 | 159.6(6)  |
| Fe4 | N20 | C83  | C84  | -175.6(3) | O30 | S10 | C118 | F29 | -55.6(7)  |
| Fe4 | N20 | C87  | C86  | 177.2(3)  | O30 | S10 | C118 | F30 | 53.3(4)   |

**Table S13.** Hydrogen Atom Coordinates ( $\text{\AA}\times 10^4$ ) and Isotropic Displacement Parameters ( $\text{\AA}^2\times 10^3$ ) for Fe(MPT).

| Atom | x     | y    | z    | U(eq) |
|------|-------|------|------|-------|
| H1A  | 222   | 5202 | 3066 | 25    |
| H1B  | 925   | 4291 | 3136 | 25    |
| H3   | -919  | 4673 | 2593 | 29    |
| H4   | -1271 | 4049 | 2010 | 34    |
| H5   | -17   | 3459 | 1714 | 30    |
| H7A  | 2076  | 4023 | 1757 | 34    |
| H7B  | 1629  | 2952 | 1744 | 34    |
| H7C  | 2379  | 3270 | 2071 | 34    |
| H8A  | 1633  | 7011 | 3018 | 25    |
| H8B  | 602   | 6591 | 2877 | 25    |
| H9A  | 1061  | 6264 | 2322 | 25    |
| H9B  | 1457  | 7336 | 2417 | 25    |
| H10A | 2741  | 6831 | 1962 | 22    |
| H10B | 2075  | 5884 | 1940 | 22    |
| H12  | 3981  | 6314 | 1624 | 22    |
| H13  | 5320  | 5305 | 1578 | 27    |
| H14  | 5520  | 3935 | 1946 | 24    |
| H16A | 4778  | 3400 | 2660 | 31    |
| H16B | 4810  | 2767 | 2307 | 31    |
| H16C | 3809  | 3000 | 2452 | 31    |
| H17A | 2904  | 7423 | 2789 | 26    |
| H17B | 3516  | 7376 | 2457 | 26    |
| H18A | 4455  | 6140 | 2702 | 23    |
| H18B | 4370  | 6876 | 3025 | 23    |
| H19A | 4697  | 5195 | 3418 | 26    |
| H19B | 4810  | 4861 | 3020 | 26    |
| H21  | 4947  | 3611 | 3677 | 36    |
| H22  | 4385  | 2014 | 3749 | 44    |
| H23  | 3066  | 1479 | 3376 | 41    |
| H25A | 1447  | 2833 | 2885 | 40    |
| H25B | 1821  | 1737 | 2928 | 40    |
| H25C | 2139  | 2403 | 2615 | 40    |
| H26A | 2997  | 6738 | 3319 | 27    |
| H26B | 3467  | 5923 | 3584 | 27    |
| H27A | 2177  | 4893 | 3465 | 25    |

|      |       |      |      |    |
|------|-------|------|------|----|
| H27B | 1721  | 5943 | 3522 | 25 |
| H55A | 4775  | 4058 | 8150 | 29 |
| H55B | 4591  | 3944 | 8558 | 29 |
| H57  | 4854  | 5654 | 8679 | 44 |
| H58  | 4208  | 7222 | 8657 | 61 |
| H59  | 2795  | 7526 | 8286 | 47 |
| H61A | 1911  | 6282 | 7597 | 44 |
| H61B | 1575  | 7028 | 7884 | 44 |
| H61C | 1284  | 5905 | 7898 | 44 |
| H62A | 3620  | 1881 | 8279 | 32 |
| H62B | 4644  | 2388 | 8281 | 32 |
| H63A | 4479  | 2556 | 7674 | 30 |
| H63B | 4143  | 1466 | 7745 | 30 |
| H64A | 2418  | 2488 | 7067 | 26 |
| H64B | 3335  | 1791 | 7108 | 26 |
| H66  | 4096  | 2621 | 6647 | 24 |
| H67  | 5120  | 3883 | 6521 | 27 |
| H68  | 5278  | 5232 | 6903 | 24 |
| H70A | 3758  | 5854 | 7514 | 34 |
| H70B | 4720  | 6169 | 7356 | 34 |
| H70C | 4766  | 5482 | 7698 | 34 |
| H71A | 2561  | 1285 | 7881 | 31 |
| H71B | 2155  | 1203 | 7470 | 31 |
| H72A | 1055  | 2423 | 7521 | 31 |
| H72B | 978   | 1735 | 7858 | 31 |
| H73A | 938   | 4209 | 8164 | 31 |
| H73B | 243   | 3319 | 8045 | 31 |
| H75  | -863  | 4132 | 7619 | 33 |
| H76  | -1186 | 4881 | 7063 | 38 |
| H77  | 106   | 5366 | 6757 | 34 |
| H79A | 2438  | 5500 | 7091 | 37 |
| H79B | 1736  | 5568 | 6731 | 37 |
| H79C | 2266  | 4566 | 6840 | 37 |
| H80A | 2119  | 2029 | 8356 | 33 |
| H80B | 1467  | 2847 | 8511 | 33 |
| H81A | 2666  | 3959 | 8553 | 33 |
| H81B | 3159  | 2974 | 8705 | 33 |
| H28A | 4609  | 3220 | -200 | 27 |

|      |       |      |      |    |
|------|-------|------|------|----|
| H28B | 4306  | 3375 | 193  | 27 |
| H30  | 4478  | 4789 | -476 | 36 |
| H31  | 3569  | 6171 | -639 | 46 |
| H32  | 2095  | 6369 | -428 | 34 |
| H34A | 667   | 4939 | -163 | 36 |
| H34B | 1059  | 5932 | 19   | 36 |
| H34C | 1206  | 4928 | 231  | 36 |
| H35A | 3233  | 1445 | -513 | 31 |
| H35B | 3698  | 2444 | -626 | 31 |
| H36A | 2269  | 3227 | -680 | 29 |
| H36B | 2053  | 2194 | -867 | 29 |
| H37A | 252   | 2598 | -680 | 30 |
| H37B | 824   | 3560 | -547 | 30 |
| H39  | -1236 | 2906 | -451 | 33 |
| H40  | -2099 | 3185 | 37   | 40 |
| H41  | -1272 | 3419 | 598  | 35 |
| H43A | 932   | 2773 | 877  | 47 |
| H43B | 143   | 3540 | 970  | 47 |
| H43C | 1058  | 3902 | 791  | 47 |
| H44A | 1770  | 880  | -493 | 34 |
| H44B | 659   | 1126 | -499 | 34 |
| H45A | 729   | 1103 | 109  | 31 |
| H45B | 1321  | 165  | 9    | 31 |
| H46A | 2259  | 464  | 685  | 29 |
| H46B | 1390  | 1220 | 651  | 29 |
| H48  | 3020  | 950  | 1256 | 34 |
| H49  | 3785  | 2181 | 1615 | 44 |
| H50  | 3835  | 3752 | 1401 | 44 |
| H52A | 3666  | 4496 | 590  | 42 |
| H52B | 3426  | 4916 | 964  | 42 |
| H52C | 2581  | 4678 | 660  | 42 |
| H53A | 2943  | 486  | -99  | 32 |
| H53B | 3302  | 329  | 312  | 32 |
| H54A | 4091  | 1806 | 348  | 30 |
| H54B | 4378  | 1301 | -7   | 30 |
| H82A | 1472  | 7896 | 5485 | 26 |
| H82B | 2349  | 8642 | 5531 | 26 |
| H84  | 2927  | 8278 | 6133 | 28 |

|      |       |      |      |     |
|------|-------|------|------|-----|
| H85  | 3606  | 7152 | 6555 | 32  |
| H86  | 3716  | 5525 | 6391 | 30  |
| H88A | 2721  | 4465 | 5612 | 35  |
| H88B | 3342  | 4253 | 5983 | 35  |
| H88C | 3856  | 4583 | 5645 | 35  |
| H89A | 1651  | 8823 | 4825 | 30  |
| H89B | 985   | 7934 | 4918 | 30  |
| H90A | 1116  | 7783 | 4320 | 34  |
| H90B | 2241  | 7977 | 4373 | 34  |
| H91A | 1195  | 5353 | 4334 | 32  |
| H91B | 679   | 6317 | 4173 | 32  |
| H93  | -873  | 6012 | 4350 | 32  |
| H94  | -1872 | 5886 | 4814 | 42  |
| H95  | -1155 | 5787 | 5401 | 32  |
| H97A | 1159  | 5288 | 5667 | 35  |
| H97B | 161   | 5567 | 5806 | 35  |
| H97C | 915   | 6401 | 5742 | 35  |
| H98A | 2540  | 6613 | 4043 | 33  |
| H98B | 2677  | 5605 | 4254 | 33  |
| H99A | 4147  | 6328 | 4349 | 33  |
| H99B | 3697  | 7374 | 4416 | 33  |
| H10C | 4476  | 5538 | 5193 | 30  |
| H10D | 4886  | 5607 | 4814 | 30  |
| H102 | 4687  | 4042 | 4526 | 32  |
| H103 | 3722  | 2689 | 4364 | 37  |
| H104 | 2216  | 2561 | 4575 | 33  |
| H10E | 1357  | 4139 | 5202 | 33  |
| H10F | 1239  | 3069 | 5037 | 33  |
| H10G | 840   | 3990 | 4809 | 33  |
| H10H | 4673  | 7576 | 4960 | 32  |
| H10I | 4279  | 7133 | 5308 | 32  |
| H10J | 3532  | 8621 | 5225 | 33  |
| H10K | 3293  | 8443 | 4808 | 33  |
| H31A | 8236  | 3488 | 6592 | 119 |
| H31B | 7329  | 3650 | 6421 | 119 |

## Co(MPT)

**Table S14.** Crystal data and structure refinement for Co(MPT).

|                                             |                                                                 |
|---------------------------------------------|-----------------------------------------------------------------|
| Identification code                         | Co(MPT)                                                         |
| Empirical formula                           | C <sub>27</sub> H <sub>36</sub> CoN <sub>8</sub> O <sub>6</sub> |
| Formula weight                              | 627.57                                                          |
| Temperature/K                               | 90                                                              |
| Crystal system                              | orthorhombic                                                    |
| Space group                                 | Pbca                                                            |
| a/Å                                         | 18.3433(7)                                                      |
| b/Å                                         | 18.0221(7)                                                      |
| c/Å                                         | 18.9080(7)                                                      |
| α/°                                         | 90.00                                                           |
| β/°                                         | 90.00                                                           |
| γ/°                                         | 90.00                                                           |
| Volume/Å <sup>3</sup>                       | 6250.7(4)                                                       |
| Z                                           | 8                                                               |
| ρ <sub>calc</sub> /g/cm <sup>3</sup>        | 1.334                                                           |
| μ/mm <sup>-1</sup>                          | 0.601                                                           |
| F(000)                                      | 2632.0                                                          |
| Crystal size/mm <sup>3</sup>                | 0.2 × 0.2 × 0.03                                                |
| Radiation                                   | MoKα (λ = 0.71073)                                              |
| 2θ range for data collection/°              | 3.84 to 60.1                                                    |
| Index ranges                                | -25 ≤ h ≤ 25, -25 ≤ k ≤ 25, -26 ≤ l ≤ 26                        |
| Reflections collected                       | 141678                                                          |
| Independent reflections                     | 9149 [R <sub>int</sub> = 0.0680, R <sub>sigma</sub> = 0.0298]   |
| Data/restraints/parameters                  | 9149/0/382                                                      |
| Goodness-of-fit on F <sup>2</sup>           | 1.088                                                           |
| Final R indexes [I ≥ 2σ (I)]                | R <sub>1</sub> = 0.0463, wR <sub>2</sub> = 0.1178               |
| Final R indexes [all data]                  | R <sub>1</sub> = 0.0642, wR <sub>2</sub> = 0.1251               |
| Largest diff. peak/hole / e Å <sup>-3</sup> | 0.99/-0.58                                                      |

**Table S15.** Fractional Atomic Coordinates ( $\times 10^4$ ) and Equivalent Isotropic Displacement Parameters ( $\text{\AA}^2 \times 10^3$ ) for Co(MPT).  $U_{\text{eq}}$  is defined as 1/3 of the trace of the orthogonalised  $U_{\text{H}}$  tensor.

| Atom | x           | y           | z           | U(eq)    |
|------|-------------|-------------|-------------|----------|
| Co1  | 8145.10(13) | 7078.64(13) | 1983.89(13) | 18.36(7) |
| N1   | 7401.3(8)   | 6978.8(8)   | 1099.7(8)   | 19.9(3)  |
| N2   | 7393.7(9)   | 6225.8(10)  | 2381.8(9)   | 27.2(3)  |
| N3   | 7430.8(9)   | 8007.1(9)   | 2198.5(9)   | 24.9(3)  |
| N4   | 8640.3(8)   | 7536.8(9)   | 2965.3(8)   | 22.7(3)  |
| N5   | 8629.6(9)   | 7879.8(9)   | 1282.5(9)   | 23.6(3)  |
| N6   | 9038.7(9)   | 6422.8(9)   | 1519.9(9)   | 24.5(3)  |
| C1   | 7134.9(10)  | 6211.2(10)  | 1117.6(10)  | 23.3(4)  |
| C2   | 6936.7(10)  | 5991.2(10)  | 1861.9(10)  | 23.3(4)  |
| C3   | 6341(1)     | 5541.1(11)  | 1989.7(11)  | 26.9(4)  |
| C4   | 6206.5(11)  | 5302.0(12)  | 2671.0(12)  | 31.8(4)  |
| C5   | 6683.0(13)  | 5507.7(13)  | 3197.4(13)  | 37.1(5)  |
| C6   | 7274.0(12)  | 5969.0(14)  | 3044.0(12)  | 35.6(5)  |
| C7   | 7795.7(17)  | 6176(2)     | 3619.7(14)  | 62.9(9)  |
| C8   | 6784.1(10)  | 7512.8(10)  | 1166.4(10)  | 23.0(4)  |
| C9   | 6702.8(11)  | 7794.7(12)  | 1923.3(11)  | 27.3(4)  |
| C10  | 7427.8(11)  | 8091.4(14)  | 2974.0(11)  | 33.5(5)  |
| C11  | 8198(1)     | 8063.0(11)  | 3252.1(10)  | 25.2(4)  |
| C12  | 8409.4(11)  | 8530.6(11)  | 3791.5(10)  | 25.7(4)  |
| C13  | 9103.9(11)  | 8454.6(11)  | 4069.6(10)  | 26.7(4)  |
| C14  | 9547.6(11)  | 7902.3(12)  | 3807.5(11)  | 29.3(4)  |
| C15  | 9309.5(10)  | 7449.4(11)  | 3256.7(11)  | 25.1(4)  |
| C16  | 9794.0(12)  | 6845.0(13)  | 2982.6(12)  | 35.2(5)  |
| C17  | 7715.3(12)  | 8685.6(11)  | 1842.2(12)  | 30.7(4)  |
| C18  | 8509.0(12)  | 8610.7(11)  | 1621.5(11)  | 28.4(4)  |
| C19  | 9410.7(11)  | 7687.2(12)  | 1253.4(11)  | 29.7(4)  |
| C20  | 9506(1)     | 6868.0(12)  | 1159.2(10)  | 27.7(4)  |
| C21  | 10069.4(12) | 6595.6(16)  | 748.6(11)   | 39.0(6)  |
| C22  | 10169.4(14) | 5837.3(17)  | 702.5(12)   | 47.9(7)  |
| C23  | 9708.7(14)  | 5382.5(15)  | 1074.1(13)  | 44.2(6)  |
| C24  | 9148.1(12)  | 5679.2(12)  | 1486.7(12)  | 32.5(5)  |
| C25  | 8667.1(13)  | 5180.3(12)  | 1905.6(16)  | 44.1(6)  |
| C26  | 8281.0(11)  | 7841.3(11)  | 566.7(11)   | 27.3(4)  |
| C27  | 7846.2(11)  | 7126.8(10)  | 464.1(10)   | 24.3(4)  |



|    |             |            |            |           |
|----|-------------|------------|------------|-----------|
| O1 | 8313.2(9)   | 5185.8(8)  | -79.5(8)   | 35.6(4)   |
| O2 | 8386.6(15)  | 4066.1(10) | 300.5(13)  | 71.9(7)   |
| O3 | 7362.8(12)  | 4639.5(10) | 366.8(13)  | 65.8(7)   |
| N7 | 8022.9(13)  | 4631.3(10) | 197.8(10)  | 38.3(5)   |
| O4 | 10093.8(11) | 8917.1(11) | 2545.5(12) | 55.3(5)   |
| O5 | 10170.2(14) | 9703.3(18) | 1675.1(15) | 97.5(11)  |
| O6 | 10906.9(16) | 8790(2)    | 1758.3(17) | 124.5(14) |
| N8 | 10401.3(12) | 9135.1(17) | 1987.9(14) | 59.9(7)   |

**Table S16.** Anisotropic Displacement Parameters ( $\text{\AA}^2 \times 10^3$ ) for Co(MPT). The Anisotropic displacement factor exponent takes the form:  $-2\pi^2[h^2a^*^2U_{11}+2hka^*b^*U_{12}+\dots]$ .

| Atom | $U_{11}$  | $U_{22}$  | $U_{33}$  | $U_{23}$  | $U_{13}$  | $U_{12}$  |
|------|-----------|-----------|-----------|-----------|-----------|-----------|
| Co1  | 17.18(12) | 18.75(12) | 19.14(12) | -0.07(9)  | 0.83(9)   | 3.02(9)   |
| N1   | 22.5(7)   | 17.6(7)   | 19.6(7)   | -1.4(5)   | 0.4(6)    | 2.9(6)    |
| N2   | 24.1(8)   | 30.6(8)   | 27.0(8)   | 7.1(7)    | -1.2(6)   | -2.5(7)   |
| N3   | 21.3(7)   | 29.1(8)   | 24.2(8)   | -8.5(6)   | -3.9(6)   | 8.1(6)    |
| N4   | 19.9(7)   | 26.3(8)   | 22.0(7)   | -1.3(6)   | -1.1(6)   | 2.0(6)    |
| N5   | 23.3(7)   | 23.1(8)   | 24.3(8)   | 0.9(6)    | -0.4(6)   | -0.5(6)   |
| N6   | 22.1(7)   | 25.1(8)   | 26.3(8)   | -6.2(6)   | -1.6(6)   | 7.0(6)    |
| C1   | 24.0(9)   | 17.7(8)   | 28.3(9)   | -2.4(7)   | -1.0(7)   | 0.1(7)    |
| C2   | 22.3(9)   | 18.8(8)   | 28.6(9)   | 1.3(7)    | 1.3(7)    | 3.7(7)    |
| C3   | 20.8(8)   | 20.9(9)   | 39.0(11)  | 1.2(8)    | 2.3(8)    | 2.1(7)    |
| C4   | 25.2(10)  | 29(1)     | 41.2(12)  | 4.8(9)    | 6.3(8)    | -1.7(8)   |
| C5   | 36.2(11)  | 40.0(12)  | 35.2(11)  | 12.7(9)   | 4.6(9)    | -6.2(10)  |
| C6   | 32.4(11)  | 43.7(13)  | 30.8(11)  | 12.6(9)   | -3.1(9)   | -6.6(9)   |
| C7   | 60.9(18)  | 92(2)     | 35.6(14)  | 30.5(15)  | -16.1(13) | -37.1(17) |
| C8   | 22.9(9)   | 21.3(8)   | 24.8(9)   | -3.4(7)   | -3.7(7)   | 5.6(7)    |
| C9   | 20.8(8)   | 31.4(10)  | 29.7(10)  | -9.0(8)   | -5.2(7)   | 8.9(7)    |
| C10  | 23.8(9)   | 50.4(13)  | 26.4(10)  | -15.6(9)  | -2.9(8)   | 11.8(9)   |
| C11  | 22.4(9)   | 32.7(10)  | 20.6(8)   | -4.4(7)   | -0.8(7)   | 4.7(7)    |
| C12  | 27.5(9)   | 28.1(9)   | 21.6(9)   | -2.2(7)   | -0.2(7)   | 2.7(8)    |
| C13  | 30.2(10)  | 27.2(9)   | 22.6(9)   | -1.7(7)   | -3.2(8)   | -3.6(8)   |
| C14  | 24.1(9)   | 34(1)     | 29.8(10)  | -0.8(8)   | -7.5(8)   | 0.3(8)    |
| C15  | 20.2(8)   | 28.2(9)   | 27.0(9)   | -1.9(7)   | -3.5(7)   | 1.5(7)    |
| C16  | 27.1(10)  | 39.9(11)  | 38.4(12)  | -10.2(9)  | -11.0(9)  | 10.7(9)   |
| C17  | 34.6(11)  | 18.2(8)   | 39.5(11)  | -7.6(8)   | -13.9(9)  | 8.7(8)    |
| C18  | 34.4(11)  | 17.7(8)   | 33.2(10)  | 0.3(7)    | -5.7(8)   | -2.0(7)   |
| C19  | 23.2(9)   | 35.4(10)  | 30.5(10)  | 2.5(8)    | 4.1(8)    | -4.7(8)   |
| C20  | 20.5(9)   | 40.1(11)  | 22.5(9)   | -3.5(8)   | -0.6(7)   | 4.4(8)    |
| C21  | 25(1)     | 69.8(17)  | 22.1(10)  | -3.7(10)  | -0.1(8)   | 15.2(10)  |
| C22  | 37.7(12)  | 80.7(19)  | 25.4(11)  | -15.5(12) | -5.2(9)   | 35.4(13)  |
| C23  | 45.3(13)  | 45.9(14)  | 41.3(13)  | -21.3(11) | -17.8(11) | 29.0(11)  |
| C24  | 29.6(10)  | 28.4(10)  | 39.6(11)  | -9.9(9)   | -13.6(9)  | 11.3(8)   |
| C25  | 37.6(12)  | 19.6(10)  | 75.1(18)  | 3.2(10)   | -12.1(12) | 6.2(9)    |
| C26  | 31.8(10)  | 27.3(10)  | 22.8(9)   | 4.0(7)    | 0.3(8)    | -4.0(8)   |
| C27  | 29.1(9)   | 24.5(9)   | 19.2(8)   | 0.7(7)    | 1.7(7)    | 1.2(7)    |
| O1   | 50.2(9)   | 23.2(7)   | 33.3(8)   | 5.8(6)    | 10.7(7)   | -4.4(6)   |

|    |           |          |          |           |           |          |
|----|-----------|----------|----------|-----------|-----------|----------|
| O2 | 105.1(18) | 31.6(10) | 79.1(16) | 24.6(10)  | 40.6(14)  | 15.6(11) |
| O3 | 70.9(14)  | 37.6(10) | 89.0(16) | -19.8(10) | 48.2(12)  | -21.7(9) |
| N7 | 66.6(14)  | 21.5(8)  | 26.7(9)  | -4.7(7)   | 17.8(9)   | -4.7(8)  |
| O4 | 48.1(11)  | 61.3(12) | 56.4(12) | 3.8(10)   | -6.1(9)   | -9.6(9)  |
| O5 | 60.9(14)  | 136(3)   | 95(2)    | 68.0(19)  | 27.0(14)  | 49.0(16) |
| O6 | 73.6(19)  | 214(4)   | 86(2)    | -13(2)    | 3.1(16)   | 79(2)    |
| N8 | 30.6(11)  | 91(2)    | 57.9(15) | -12.8(14) | -11.4(11) | 13.8(12) |

**Table S17.** Bond Lengths for Co(MPT).

| Atom | Atom | Length/Å   | Atom | Atom | Length/Å |
|------|------|------------|------|------|----------|
| Co1  | N1   | 2.1654(15) | C4   | C5   | 1.376(3) |
| Co1  | N2   | 2.1973(16) | C5   | C6   | 1.396(3) |
| Co1  | N3   | 2.1636(15) | C6   | C7   | 1.497(3) |
| Co1  | N4   | 2.2249(16) | C8   | C9   | 1.526(3) |
| Co1  | N5   | 2.1525(16) | C10  | C11  | 1.508(3) |
| Co1  | N6   | 2.2031(15) | C11  | C12  | 1.379(3) |
| N1   | C1   | 1.468(2)   | C12  | C13  | 1.385(3) |
| N1   | C8   | 1.491(2)   | C13  | C14  | 1.378(3) |
| N1   | C27  | 1.477(2)   | C14  | C15  | 1.393(3) |
| N2   | C2   | 1.359(3)   | C15  | C16  | 1.498(3) |
| N2   | C6   | 1.353(3)   | C17  | C18  | 1.521(3) |
| N3   | C9   | 1.483(2)   | C19  | C20  | 1.497(3) |
| N3   | C10  | 1.474(3)   | C20  | C21  | 1.383(3) |
| N3   | C17  | 1.490(3)   | C21  | C22  | 1.382(4) |
| N4   | C11  | 1.361(2)   | C22  | C23  | 1.371(4) |
| N4   | C15  | 1.355(2)   | C23  | C24  | 1.397(3) |
| N5   | C18  | 1.482(2)   | C24  | C25  | 1.488(4) |
| N5   | C19  | 1.475(3)   | C26  | C27  | 1.527(3) |
| N5   | C26  | 1.498(3)   | O1   | N7   | 1.248(2) |
| N6   | C20  | 1.358(3)   | O2   | N7   | 1.233(3) |
| N6   | C24  | 1.356(3)   | O3   | N7   | 1.252(3) |
| C1   | C2   | 1.507(3)   | O4   | N8   | 1.259(3) |
| C2   | C3   | 1.382(3)   | O5   | N8   | 1.256(4) |
| C3   | C4   | 1.380(3)   | O6   | N8   | 1.198(3) |

**Table S18.** Bond Angles for Co(MPT).

| Atom | Atom | Atom | Angle/°    | Atom | Atom | Atom | Angle/°    |
|------|------|------|------------|------|------|------|------------|
| N1   | Co1  | N2   | 79.11(6)   | N1   | C1   | C2   | 110.49(15) |
| N1   | Co1  | N4   | 158.75(6)  | N2   | C2   | C1   | 116.42(16) |
| N1   | Co1  | N6   | 96.71(6)   | N2   | C2   | C3   | 122.93(18) |
| N2   | Co1  | N4   | 103.30(6)  | C3   | C2   | C1   | 120.56(18) |
| N2   | Co1  | N6   | 103.16(6)  | C4   | C3   | C2   | 119.2(2)   |
| N3   | Co1  | N1   | 80.07(6)   | C5   | C4   | C3   | 118.52(19) |
| N3   | Co1  | N2   | 95.56(7)   | C4   | C5   | C6   | 120.2(2)   |
| N3   | Co1  | N4   | 78.68(6)   | N2   | C6   | C5   | 121.5(2)   |
| N3   | Co1  | N6   | 160.08(7)  | N2   | C6   | C7   | 119.0(2)   |
| N5   | Co1  | N1   | 80.80(6)   | C5   | C6   | C7   | 119.6(2)   |
| N5   | Co1  | N2   | 159.91(6)  | N1   | C8   | C9   | 111.62(15) |
| N5   | Co1  | N3   | 81.19(6)   | N3   | C9   | C8   | 109.08(16) |
| N5   | Co1  | N4   | 95.53(6)   | N3   | C10  | C11  | 109.86(16) |
| N5   | Co1  | N6   | 78.89(6)   | N4   | C11  | C10  | 116.31(17) |
| N6   | Co1  | N4   | 103.15(6)  | N4   | C11  | C12  | 123.58(18) |
| C1   | N1   | Co1  | 105.68(11) | C12  | C11  | C10  | 120.04(17) |
| C1   | N1   | C8   | 110.70(14) | C11  | C12  | C13  | 118.63(18) |
| C1   | N1   | C27  | 111.90(14) | C14  | C13  | C12  | 118.57(18) |
| C8   | N1   | Co1  | 111.07(11) | C13  | C14  | C15  | 120.45(18) |
| C27  | N1   | Co1  | 105.37(11) | N4   | C15  | C14  | 121.33(18) |
| C27  | N1   | C8   | 111.83(14) | N4   | C15  | C16  | 118.77(17) |
| C2   | N2   | Co1  | 110.90(12) | C14  | C15  | C16  | 119.90(17) |
| C6   | N2   | Co1  | 131.15(15) | N3   | C17  | C18  | 112.74(15) |
| C6   | N2   | C2   | 117.56(17) | N5   | C18  | C17  | 109.91(16) |
| C9   | N3   | Co1  | 106.25(11) | N5   | C19  | C20  | 110.48(16) |
| C9   | N3   | C17  | 111.61(16) | N6   | C20  | C19  | 116.69(17) |
| C10  | N3   | Co1  | 105.58(12) | N6   | C20  | C21  | 123.0(2)   |
| C10  | N3   | C9   | 111.85(16) | C21  | C20  | C19  | 120.3(2)   |
| C10  | N3   | C17  | 111.49(17) | C22  | C21  | C20  | 119.1(2)   |
| C17  | N3   | Co1  | 109.73(12) | C23  | C22  | C21  | 118.5(2)   |
| C11  | N4   | Co1  | 110.34(12) | C22  | C23  | C24  | 120.7(2)   |
| C15  | N4   | Co1  | 131.76(13) | N6   | C24  | C23  | 120.8(2)   |
| C15  | N4   | C11  | 117.34(16) | N6   | C24  | C25  | 118.99(19) |
| C18  | N5   | Co1  | 105.56(12) | C23  | C24  | C25  | 120.2(2)   |
| C18  | N5   | C26  | 111.60(15) | N5   | C26  | C27  | 112.12(15) |
| C19  | N5   | Co1  | 105.43(12) | N1   | C27  | C26  | 109.72(15) |

|     |    |     |            |    |    |    |          |
|-----|----|-----|------------|----|----|----|----------|
| C19 | N5 | C18 | 111.73(16) | O1 | N7 | O3 | 120.7(2) |
| C19 | N5 | C26 | 111.72(16) | O2 | N7 | O1 | 119.8(2) |
| C26 | N5 | Co1 | 110.44(11) | O2 | N7 | O3 | 119.5(2) |
| C20 | N6 | Co1 | 110.65(12) | O5 | N8 | O4 | 119.8(2) |
| C24 | N6 | Co1 | 131.18(15) | O6 | N8 | O4 | 119.3(3) |
| C24 | N6 | C20 | 117.85(18) | O6 | N8 | O5 | 120.9(3) |

**Table S19.** Torsion Angles for Co(MPT).

| A   | B   | C   | D   | Angle/°     | A  | B   | C   | D   | Angle/°     |
|-----|-----|-----|-----|-------------|----|-----|-----|-----|-------------|
| Co1 | N1  | C1  | C2  | 44.62(16)   | N4 | Co1 | N6  | C24 | 105.44(18)  |
| Co1 | N1  | C8  | C9  | -18.52(19)  | N4 | C11 | C12 | C13 | -1.4(3)     |
| Co1 | N1  | C27 | C26 | -49.74(16)  | N5 | Co1 | N1  | C1  | 150.50(12)  |
| Co1 | N2  | C2  | C1  | 13.4(2)     | N5 | Co1 | N1  | C8  | -89.39(12)  |
| Co1 | N2  | C2  | C3  | -170.07(15) | N5 | Co1 | N1  | C27 | 31.88(11)   |
| Co1 | N2  | C6  | C5  | 169.22(18)  | N5 | Co1 | N2  | C2  | 8.5(3)      |
| Co1 | N2  | C6  | C7  | -11.8(4)    | N5 | Co1 | N2  | C6  | -164.08(19) |
| Co1 | N3  | C9  | C8  | -49.93(18)  | N5 | Co1 | N3  | C9  | 113.05(13)  |
| Co1 | N3  | C10 | C11 | 46.9(2)     | N5 | Co1 | N3  | C10 | -128.02(14) |
| Co1 | N3  | C17 | C18 | -16.94(19)  | N5 | Co1 | N3  | C17 | -7.76(12)   |
| Co1 | N4  | C11 | C10 | 14.3(2)     | N5 | Co1 | N4  | C11 | 89.43(14)   |
| Co1 | N4  | C11 | C12 | -168.85(16) | N5 | Co1 | N4  | C15 | -81.50(18)  |
| Co1 | N4  | C15 | C14 | 167.65(15)  | N5 | Co1 | N6  | C20 | 11.88(13)   |
| Co1 | N4  | C15 | C16 | -13.2(3)    | N5 | Co1 | N6  | C24 | -161.40(19) |
| Co1 | N5  | C18 | C17 | -48.83(18)  | N5 | C19 | C20 | N6  | -39.1(2)    |
| Co1 | N5  | C19 | C20 | 45.50(18)   | N5 | C19 | C20 | C21 | 143.93(19)  |
| Co1 | N5  | C26 | C27 | -15.97(19)  | N5 | C26 | C27 | N1  | 44.9(2)     |
| Co1 | N6  | C20 | C19 | 10.6(2)     | N6 | Co1 | N1  | C1  | 72.95(12)   |
| Co1 | N6  | C20 | C21 | -172.44(16) | N6 | Co1 | N1  | C8  | -166.94(12) |
| Co1 | N6  | C24 | C23 | 170.71(15)  | N6 | Co1 | N1  | C27 | -45.66(11)  |
| Co1 | N6  | C24 | C25 | -10.1(3)    | N6 | Co1 | N2  | C2  | -85.13(13)  |
| N1  | Co1 | N2  | C2  | 9.29(13)    | N6 | Co1 | N2  | C6  | 102.3(2)    |
| N1  | Co1 | N2  | C6  | -163.3(2)   | N6 | Co1 | N3  | C9  | 113.16(19)  |
| N1  | Co1 | N3  | C9  | 30.93(13)   | N6 | Co1 | N3  | C10 | -127.92(19) |
| N1  | Co1 | N3  | C10 | 149.85(14)  | N6 | Co1 | N3  | C17 | -7.6(2)     |
| N1  | Co1 | N3  | C17 | -89.88(12)  | N6 | Co1 | N4  | C11 | 169.28(13)  |
| N1  | Co1 | N4  | C11 | 10.6(2)     | N6 | Co1 | N4  | C15 | -1.65(19)   |
| N1  | Co1 | N4  | C15 | -160.31(17) | N6 | Co1 | N5  | C18 | -149.21(13) |
| N1  | Co1 | N5  | C18 | 112.03(12)  | N6 | Co1 | N5  | C19 | -30.81(12)  |
| N1  | Co1 | N5  | C19 | -129.58(13) | N6 | Co1 | N5  | C26 | 90.03(13)   |
| N1  | Co1 | N5  | C26 | -8.74(12)   | N6 | C20 | C21 | C22 | -0.4(3)     |
| N1  | Co1 | N6  | C20 | 91.10(13)   | C1 | N1  | C8  | C9  | 98.56(18)   |
| N1  | Co1 | N6  | C24 | -82.19(18)  | C1 | N1  | C27 | C26 | -164.10(15) |
| N1  | C1  | C2  | N2  | -40.5(2)    | C1 | C2  | C3  | C4  | 174.99(18)  |
| N1  | C1  | C2  | C3  | 142.81(17)  | C2 | N2  | C6  | C5  | -3.0(3)     |
| N1  | C8  | C9  | N3  | 46.2(2)     | C2 | N2  | C6  | C7  | 176.0(2)    |

N2 Co1 N1 C1 -29.22(11) C2 C3 C4 C5 -1.5(3)  
 N2 Co1 N1 C8 90.88(12) C3 C4 C5 C6 2.1(3)  
 N2 Co1 N1 C27 -147.84(12) C4 C5 C6 N2 0.1(4)  
 N2 Co1 N3 C9 -46.96(13) C4 C5 C6 C7 -178.8(3)  
 N2 Co1 N3 C10 71.96(14) C6 N2 C2 C1 -172.92(19)  
 N2 Co1 N3 C17 -167.77(12) C6 N2 C2 C3 3.6(3)  
 N2 Co1 N4 C11 -83.53(14) C8 N1 C1 C2 -75.72(18)  
 N2 Co1 N4 C15 105.54(18) C8 N1 C27 C26 71.04(19)  
 N2 Co1 N5 C18 112.8(2) C9 N3 C10 C11 162.01(17)  
 N2 Co1 N5 C19 -128.79(19) C9 N3 C17 C18 -134.45(17)  
 N2 Co1 N5 C26 -8.0(3) C10 N3 C9 C8 -164.65(17)  
 N2 Co1 N6 C20 171.43(13) C10 N3 C17 C18 99.67(19)  
 N2 Co1 N6 C24 -1.85(19) C10 C11 C12 C13 175.4(2)  
 N2 C2 C3 C4 -1.4(3) C11 N4 C15 C14 -2.8(3)  
 N3 Co1 N1 C1 -126.91(12) C11 N4 C15 C16 176.41(19)  
 N3 Co1 N1 C8 -6.81(12) C11 C12 C13 C14 -1.6(3)  
 N3 Co1 N1 C27 114.47(11) C12 C13 C14 C15 2.3(3)  
 N3 Co1 N2 C2 88.03(13) C13 C14 C15 N4 -0.1(3)  
 N3 Co1 N2 C6 -84.5(2) C13 C14 C15 C16 -179.3(2)  
 N3 Co1 N4 C11 9.58(13) C15 N4 C11 C10 -173.33(19)  
 N3 Co1 N4 C15 -161.35(19) C15 N4 C11 C12 3.5(3)  
 N3 Co1 N5 C18 30.76(12) C17 N3 C9 C8 69.7(2)  
 N3 Co1 N5 C19 149.15(13) C17 N3 C10 C11 -72.2(2)  
 N3 Co1 N5 C26 -90.01(13) C18 N5 C19 C20 159.68(16)  
 N3 Co1 N6 C20 11.8(3) C18 N5 C26 C27 -133.06(18)  
 N3 Co1 N6 C24 -161.51(18) C19 N5 C18 C17 -162.93(16)  
 N3 C10 C11 N4 -42.6(3) C19 N5 C26 C27 101.04(19)  
 N3 C10 C11 C12 140.4(2) C19 C20 C21 C22 176.4(2)  
 N3 C17 C18 N5 45.0(2) C20 N6 C24 C23 -2.2(3)  
 N4 Co1 N1 C1 -127.95(16) C20 N6 C24 C25 176.97(19)  
 N4 Co1 N1 C8 -7.8(2) C20 C21 C22 C23 -0.7(3)  
 N4 Co1 N1 C27 113.43(17) C21 C22 C23 C24 0.4(3)  
 N4 Co1 N2 C2 167.69(13) C22 C23 C24 N6 1.1(3)  
 N4 Co1 N2 C6 -4.9(2) C22 C23 C24 C25 -178.0(2)  
 N4 Co1 N3 C9 -149.45(14) C24 N6 C20 C19 -175.08(18)  
 N4 Co1 N3 C10 -30.53(13) C24 N6 C20 C21 1.8(3)  
 N4 Co1 N3 C17 89.74(12) C26 N5 C18 C17 71.2(2)  
 N4 Co1 N5 C18 -46.86(12) C26 N5 C19 C20 -74.5(2)



N4 Co1 N5 C19 71.54(12) C27 N1 C1 C2 158.80(15)  
N4 Co1 N5 C26 -167.63(12) C27 N1 C8 C9 -135.93(17)  
N4 Co1 N6 C20 -81.27(13)

**Table S20.** Hydrogen Atom Coordinates ( $\text{\AA}\times 10^4$ ) and Isotropic Displacement Parameters ( $\text{\AA}^2\times 10^3$ ) for Co(MPT).

| Atom | <i>x</i> | <i>y</i> | <i>z</i> | U(eq) |
|------|----------|----------|----------|-------|
| H1A  | 7517     | 5874     | 935      | 28    |
| H1B  | 6702     | 6164     | 809      | 28    |
| H3   | 6028     | 5398     | 1613     | 32    |
| H4   | 5794     | 5002     | 2774     | 38    |
| H5   | 6610     | 5335     | 3667     | 45    |
| H7A  | 8295     | 6156     | 3438     | 94    |
| H7B  | 7745     | 5827     | 4015     | 94    |
| H7C  | 7689     | 6680     | 3784     | 94    |
| H8A  | 6326     | 7266     | 1019     | 28    |
| H8B  | 6868     | 7939     | 846      | 28    |
| H9A  | 6373     | 8229     | 1933     | 33    |
| H9B  | 6489     | 7402     | 2224     | 33    |
| H10A | 7136     | 7688     | 3190     | 40    |
| H10B | 7201     | 8571     | 3103     | 40    |
| H12  | 8085     | 8897     | 3969     | 31    |
| H13  | 9271     | 8776     | 4433     | 32    |
| H14  | 10019    | 7830     | 4004     | 35    |
| H16A | 9496     | 6419     | 2842     | 53    |
| H16B | 10135    | 6694     | 3354     | 53    |
| H16C | 10067    | 7027     | 2573     | 53    |
| H17A | 7666     | 9113     | 2167     | 37    |
| H17B | 7416     | 8789     | 1418     | 37    |
| H18A | 8636     | 9012     | 1286     | 34    |
| H18B | 8827     | 8659     | 2042     | 34    |
| H19A | 9652     | 7847     | 1696     | 36    |
| H19B | 9644     | 7952     | 855      | 36    |
| H21  | 10383    | 6925     | 502      | 47    |
| H22  | 10549    | 5636     | 420      | 58    |
| H23  | 9771     | 4860     | 1051     | 53    |
| H25A | 8648     | 5353     | 2397     | 66    |
| H25B | 8861     | 4674     | 1892     | 66    |
| H25C | 8175     | 5185     | 1704     | 66    |
| H26A | 8664     | 7872     | 199      | 33    |
| H26B | 7952     | 8272     | 506      | 33    |
| H27A | 7525     | 7175     | 46       | 29    |
| H27B | 8184     | 6707     | 381      | 29    |

**Table S21.** Solvent masks information for Co(MPT).

| <b>Number</b> | <b>X</b> | <b>Y</b> | <b>Z</b> | <b>Volume</b> | <b>Electron count</b> | <b>Content</b> |
|---------------|----------|----------|----------|---------------|-----------------------|----------------|
| 1             | 0.000    | 0.000    | 0.000    | 223.8         | 64.2                  | ?              |
| 2             | 0.000    | 0.500    | 0.500    | 223.8         | 64.2                  | ?              |
| 3             | 0.500    | 0.000    | 0.500    | 223.8         | 64.2                  | ?              |
| 4             | 0.500    | 0.500    | 0.000    | 223.8         | 64.2                  | ?              |

## Fe(TMPC)

**Table S22.** Crystal data and structure refinement for Fe(TMPC).

|                                             |                                                                                                  |
|---------------------------------------------|--------------------------------------------------------------------------------------------------|
| Identification code                         | Fe(TMPC)                                                                                         |
| Empirical formula                           | C <sub>19</sub> H <sub>24</sub> F <sub>3</sub> Fe <sub>0.5</sub> N <sub>4</sub> O <sub>3</sub> S |
| Formula weight                              | 706.39                                                                                           |
| Temperature/K                               | 90.0                                                                                             |
| Crystal system                              | triclinic                                                                                        |
| Space group                                 | P-1                                                                                              |
| a/Å                                         | 9.439(2)                                                                                         |
| b/Å                                         | 14.994(3)                                                                                        |
| c/Å                                         | 16.128(3)                                                                                        |
| α/°                                         | 106.106(6)                                                                                       |
| β/°                                         | 102.699(6)                                                                                       |
| γ/°                                         | 91.165(6)                                                                                        |
| Volume/Å <sup>3</sup>                       | 2131.4(8)                                                                                        |
| Z                                           | 4                                                                                                |
| ρ <sub>calc</sub> /g/cm <sup>3</sup>        | 2.201                                                                                            |
| μ/mm <sup>-1</sup>                          | 1.029                                                                                            |
| F(000)                                      | 1432.0                                                                                           |
| Crystal size/mm <sup>3</sup>                | 0.4 × 0.04 × 0.02                                                                                |
| Radiation                                   | MoKα (λ = 0.71073)                                                                               |
| 2Θ range for data collection/°              | 3.3 to 52.86                                                                                     |
| Index ranges                                | -11 ≤ h ≤ 11, -18 ≤ k ≤ 18, -20 ≤ l ≤ 20                                                         |
| Reflections collected                       | 29477                                                                                            |
| Independent reflections                     | 8571 [R <sub>int</sub> = 0.1168, R <sub>sigma</sub> = 0.1513]                                    |
| Data/restraints/parameters                  | 8571/0/554                                                                                       |
| Goodness-of-fit on F <sup>2</sup>           | 1.074                                                                                            |
| Final R indexes [I ≥ 2σ (I)]                | R <sub>1</sub> = 0.1116, wR <sub>2</sub> = 0.2740                                                |
| Final R indexes [all data]                  | R <sub>1</sub> = 0.1775, wR <sub>2</sub> = 0.3013                                                |
| Largest diff. peak/hole / e Å <sup>-3</sup> | 1.30/-1.01                                                                                       |

**Table S23.** Fractional Atomic Coordinates ( $\times 10^4$ ) and Equivalent Isotropic Displacement Parameters ( $\text{\AA}^2 \times 10^3$ ) for Fe(TMPC).  $U_{\text{eq}}$  is defined as 1/3 of the trace of the orthogonalised  $U_{\text{ij}}$  tensor.

| Atom | x          | y          | z          | U(eq)    |
|------|------------|------------|------------|----------|
| Fe1  | 2392.7(13) | 2611.2(9)  | 2596.3(9)  | 14.5(3)  |
| S2   | 2287(2)    | 4933.9(16) | 6827.9(16) | 19.3(5)  |
| S3   | 4569(3)    | 861.8(17)  | 8646.8(17) | 21.6(5)  |
| F4   | 2319(7)    | 3598(4)    | 7574(4)    | 38.6(16) |
| F5   | 2736(7)    | 3168(4)    | 6280(4)    | 33.6(14) |
| F6   | 4403(6)    | 3982(4)    | 7393(5)    | 39.4(16) |
| O7   | 5681(7)    | 620(5)     | 8160(5)    | 25.7(16) |
| O8   | 3144(7)    | 5138(5)    | 6256(5)    | 26.2(16) |
| F9   | 4445(8)    | 2383(4)    | 8151(5)    | 44.0(17) |
| O10  | 5103(7)    | 1422(5)    | 9554(5)    | 30.3(17) |
| F11  | 2889(8)    | 1260(5)    | 7284(4)    | 49.9(19) |
| O12  | 2548(8)    | 5598(5)    | 7699(5)    | 33.6(18) |
| F13  | 2545(7)    | 2021(5)    | 8544(5)    | 42.0(17) |
| O14  | 770(7)     | 4656(5)    | 6396(5)    | 29.8(17) |
| N15  | 2781(7)    | 3754(5)    | 3849(5)    | 15.2(16) |
| N16  | 935(8)     | 2160(5)    | 3370(5)    | 16.2(16) |
| N17  | 4359(8)    | 2068(5)    | 3451(5)    | 17.1(16) |
| O18  | 3455(7)    | 117(5)     | 8497(5)    | 33.9(18) |
| N19  | 946(8)     | 1870(5)    | 1311(5)    | 17.5(17) |
| N20  | 2270(9)    | 5061(6)    | 695(6)     | 25.1(19) |
| N21  | 2364(8)    | 3944(5)    | 2099(5)    | 17.8(17) |
| N22  | 3876(8)    | 2239(5)    | 1703(5)    | 16.5(16) |
| C23  | 2963(10)   | 3869(7)    | 7042(7)    | 23(2)    |
| C24  | 5285(9)    | 1095(7)    | 4513(6)    | 20(2)    |
| C25  | 4025(10)   | 1364(7)    | 3927(6)    | 19(2)    |
| C26  | -592(10)   | 1154(7)    | 3780(7)    | 25(2)    |
| C27  | 936(10)    | 983(6)     | -173(6)    | 21(2)    |
| C28  | 1385(9)    | 3819(7)    | 4132(6)    | 19(2)    |
| C29  | 1634(9)    | 1404(6)    | 715(6)     | 15.4(19) |
| C30  | 5933(10)   | 305(7)     | 4214(7)    | 21(2)    |
| C31  | 2402(10)   | 4783(6)    | 2877(6)    | 19(2)    |
| C32  | 7485(11)   | 615(7)     | 5655(7)    | 27(2)    |
| C33  | 6807(11)   | 1434(7)    | 5919(7)    | 26(2)    |
| C34  | 5388(9)    | 2131(7)    | 2176(7)    | 23(2)    |

|     |           |         |         |          |
|-----|-----------|---------|---------|----------|
| C35 | -811(10)  | 1878(7) | 4467(6) | 22(2)    |
| C36 | 704(9)    | 2884(6) | 4045(6) | 16.6(19) |
| N37 | 5705(8)   | 1667(6) | 5354(5) | 22.8(18) |
| C38 | 3246(10)  | 4650(6) | 3728(6) | 19(2)    |
| C39 | 490(10)   | 526(7)  | 2470(6) | 22(2)    |
| C40 | 281(9)    | 1297(7) | 3239(6) | 22(2)    |
| C41 | 3807(10)  | 3914(7) | 1865(6) | 20(2)    |
| C42 | 3940(10)  | 2981(6) | 1256(6) | 20(2)    |
| C43 | -518(9)   | 1913(6) | 1060(6) | 19(2)    |
| C44 | 1183(10)  | 4006(7) | 1334(7) | 23(2)    |
| C45 | 7048(10)  | 38(7)   | 4796(7) | 27(2)    |
| C46 | 5356(10)  | 1658(7) | 2883(6) | 21(2)    |
| C47 | -549(11)  | 1033(7) | -417(6) | 24(2)    |
| C48 | 2384(12)  | 5899(7) | 525(7)  | 30(2)    |
| C49 | -149(10)  | 2763(7) | 4604(7) | 21(2)    |
| C50 | 1219(10)  | 4936(7) | 1113(6) | 21(2)    |
| C51 | -1273(10) | 2457(7) | 1738(7) | 25(2)    |
| C52 | 5041(9)   | 2953(6) | 4096(6) | 16.5(19) |
| C53 | 7236(13)  | 2049(9) | 6849(7) | 38(3)    |
| C54 | -1287(10) | 1477(6) | 192(6)  | 20(2)    |
| C55 | 3574(12)  | 1675(8) | 8139(8) | 35(3)    |
| C56 | 1455(13)  | 6582(7) | 761(7)  | 35(3)    |
| C57 | 3913(10)  | 3492(7) | 4521(6) | 20(2)    |
| C58 | 386(12)   | 6423(8) | 1168(7) | 35(3)    |
| C59 | 3544(13)  | 6015(8) | 55(8)   | 41(3)    |
| C60 | 245(11)   | 5570(7) | 1336(7) | 26(2)    |
| C61 | 3242(9)   | 1342(6) | 1053(6) | 16.7(19) |

**Table S24.** Anisotropic Displacement Parameters ( $\text{\AA}^2 \times 10^3$ ) for Fe(TMPC). The Anisotropic displacement factor exponent takes the form:  $-2\pi^2[h^2a^*^2U_{11}+2hka^*b^*U_{12}+\dots]$ .

| Atom | $U_{11}$ | $U_{22}$ | $U_{33}$ | $U_{23}$ | $U_{13}$ | $U_{12}$ |
|------|----------|----------|----------|----------|----------|----------|
| Fe1  | 11.2(6)  | 15.2(7)  | 19.4(7)  | 6.1(5)   | 7.0(5)   | 2.6(5)   |
| S2   | 18.8(11) | 17.6(12) | 24.0(13) | 6.3(10)  | 9.7(10)  | 5.1(9)   |
| S3   | 19.3(12) | 22.4(13) | 28.1(14) | 11.0(11) | 10.6(10) | 7(1)     |
| F4   | 47(4)    | 42(4)    | 44(4)    | 26(3)    | 28(3)    | 17(3)    |
| F5   | 39(4)    | 23(3)    | 39(4)    | 5(3)     | 13(3)    | 7(3)     |
| F6   | 22(3)    | 38(4)    | 56(4)    | 20(3)    | -5(3)    | 4(3)     |
| O7   | 26(4)    | 23(4)    | 36(4)    | 15(3)    | 15(3)    | 10(3)    |
| O8   | 22(3)    | 29(4)    | 29(4)    | 7(3)     | 10(3)    | 4(3)     |
| F9   | 56(4)    | 24(3)    | 66(5)    | 25(3)    | 25(4)    | 18(3)    |
| O10  | 26(4)    | 36(4)    | 32(4)    | 11(3)    | 12(3)    | 10(3)    |
| F11  | 53(4)    | 55(5)    | 37(4)    | 12(4)    | 0(3)     | 26(4)    |
| O12  | 45(5)    | 34(4)    | 26(4)    | 8(3)     | 16(4)    | 9(4)     |
| F13  | 43(4)    | 40(4)    | 56(4)    | 21(3)    | 27(3)    | 29(3)    |
| O14  | 17(3)    | 29(4)    | 47(5)    | 18(4)    | 5(3)     | 6(3)     |
| N15  | 11(4)    | 19(4)    | 19(4)    | 11(3)    | 4(3)     | 5(3)     |
| N16  | 12(4)    | 19(4)    | 17(4)    | 5(3)     | 3(3)     | 4(3)     |
| N17  | 14(4)    | 15(4)    | 27(4)    | 12(3)    | 8(3)     | 3(3)     |
| O18  | 19(4)    | 24(4)    | 54(5)    | 4(4)     | 7(3)     | -1(3)    |
| N19  | 13(4)    | 16(4)    | 30(5)    | 14(3)    | 9(3)     | 2(3)     |
| N20  | 24(4)    | 22(4)    | 31(5)    | 11(4)    | 6(4)     | 1(3)     |
| N21  | 11(4)    | 19(4)    | 26(4)    | 7(3)     | 10(3)    | 1(3)     |
| N22  | 14(4)    | 19(4)    | 18(4)    | 5(3)     | 6(3)     | 7(3)     |
| C23  | 20(5)    | 20(5)    | 32(6)    | 8(4)     | 8(4)     | 8(4)     |
| C24  | 14(4)    | 27(5)    | 25(5)    | 11(4)    | 9(4)     | -4(4)    |
| C25  | 16(4)    | 24(5)    | 18(5)    | 9(4)     | 2(4)     | -2(4)    |
| C26  | 17(5)    | 32(6)    | 30(6)    | 14(5)    | 5(4)     | -1(4)    |
| C27  | 25(5)    | 11(5)    | 25(5)    | 3(4)     | 2(4)     | -1(4)    |
| C28  | 14(4)    | 23(5)    | 21(5)    | 6(4)     | 7(4)     | 6(4)     |
| C29  | 19(4)    | 9(4)     | 27(5)    | 13(4)    | 13(4)    | 3(4)     |
| C30  | 18(5)    | 21(5)    | 28(5)    | 13(4)    | 8(4)     | 4(4)     |
| C31  | 13(4)    | 16(5)    | 29(5)    | 7(4)     | 3(4)     | 2(4)     |
| C32  | 22(5)    | 23(5)    | 39(6)    | 18(5)    | 2(5)     | -3(4)    |
| C33  | 28(5)    | 27(6)    | 29(6)    | 17(5)    | 11(5)    | -2(4)    |
| C34  | 8(4)     | 32(6)    | 27(5)    | 8(5)     | 0(4)     | 1(4)     |
| C35  | 19(5)    | 26(5)    | 25(5)    | 10(4)    | 12(4)    | -1(4)    |

|     |       |       |       |       |       |       |
|-----|-------|-------|-------|-------|-------|-------|
| C36 | 14(4) | 18(5) | 21(5) | 8(4)  | 7(4)  | 5(4)  |
| N37 | 20(4) | 31(5) | 24(4) | 15(4) | 9(4)  | 2(4)  |
| C38 | 19(5) | 16(5) | 27(5) | 12(4) | 10(4) | 1(4)  |
| C39 | 21(5) | 19(5) | 23(5) | -1(4) | 6(4)  | 2(4)  |
| C40 | 9(4)  | 30(6) | 27(5) | 12(4) | 2(4)  | 6(4)  |
| C41 | 18(5) | 23(5) | 23(5) | 13(4) | 5(4)  | 1(4)  |
| C42 | 18(5) | 23(5) | 26(5) | 14(4) | 9(4)  | -2(4) |
| C43 | 13(4) | 14(5) | 30(5) | 10(4) | 3(4)  | -2(4) |
| C44 | 12(4) | 25(5) | 30(6) | 5(4)  | 8(4)  | 4(4)  |
| C45 | 18(5) | 28(6) | 42(6) | 20(5) | 11(5) | 9(4)  |
| C46 | 14(4) | 26(5) | 25(5) | 11(4) | 8(4)  | 2(4)  |
| C47 | 27(5) | 24(5) | 18(5) | 2(4)  | 4(4)  | 2(4)  |
| C48 | 34(6) | 28(6) | 22(5) | 2(5)  | -1(5) | -2(5) |
| C49 | 19(5) | 19(5) | 29(5) | 6(4)  | 13(4) | 8(4)  |
| C50 | 20(5) | 19(5) | 23(5) | 5(4)  | 6(4)  | 2(4)  |
| C51 | 8(4)  | 36(6) | 30(6) | 7(5)  | 5(4)  | 6(4)  |
| C52 | 10(4) | 22(5) | 22(5) | 12(4) | 4(4)  | 3(4)  |
| C53 | 39(7) | 49(7) | 24(6) | 12(5) | 1(5)  | 0(6)  |
| C54 | 15(5) | 21(5) | 30(6) | 14(4) | 6(4)  | 7(4)  |
| C55 | 26(6) | 39(7) | 48(7) | 18(6) | 18(5) | 16(5) |
| C56 | 48(7) | 20(6) | 32(6) | 15(5) | -8(5) | -3(5) |
| C57 | 18(5) | 19(5) | 20(5) | 3(4)  | 1(4)  | 5(4)  |
| C58 | 36(6) | 34(6) | 33(6) | 10(5) | 2(5)  | 9(5)  |
| C59 | 46(7) | 33(7) | 44(7) | 16(6) | 6(6)  | -8(5) |
| C60 | 30(5) | 25(5) | 31(6) | 14(5) | 15(5) | 4(4)  |
| C61 | 16(4) | 20(5) | 19(5) | 9(4)  | 10(4) | 8(4)  |



**Table S25.** Bond Lengths for Fe(TMPC).

| Atom | Atom | Length/Å  | Atom | Atom | Length/Å  |
|------|------|-----------|------|------|-----------|
| Fe1  | N15  | 2.210(8)  | N21  | C44  | 1.497(12) |
| Fe1  | N16  | 2.256(7)  | N22  | C34  | 1.498(11) |
| Fe1  | N17  | 2.360(7)  | N22  | C42  | 1.491(11) |
| Fe1  | N19  | 2.193(8)  | N22  | C61  | 1.475(12) |
| Fe1  | N21  | 2.348(8)  | C24  | C25  | 1.486(13) |
| Fe1  | N22  | 2.195(7)  | C24  | C30  | 1.360(13) |
| S2   | O8   | 1.440(7)  | C24  | N37  | 1.355(12) |
| S2   | O12  | 1.444(7)  | C26  | C35  | 1.376(14) |
| S2   | O14  | 1.444(7)  | C26  | C40  | 1.378(13) |
| S2   | C23  | 1.824(10) | C27  | C29  | 1.397(13) |
| S3   | O7   | 1.438(7)  | C27  | C47  | 1.380(13) |
| S3   | O10  | 1.442(8)  | C28  | C36  | 1.488(13) |
| S3   | O18  | 1.449(7)  | C29  | C61  | 1.509(12) |
| S3   | C55  | 1.817(11) | C30  | C45  | 1.393(13) |
| F4   | C23  | 1.298(11) | C31  | C38  | 1.495(13) |
| F5   | C23  | 1.349(11) | C32  | C33  | 1.401(15) |
| F6   | C23  | 1.340(11) | C32  | C45  | 1.380(15) |
| F9   | C55  | 1.322(13) | C33  | N37  | 1.345(13) |
| F11  | C55  | 1.350(14) | C33  | C53  | 1.489(15) |
| F13  | C55  | 1.323(12) | C34  | C46  | 1.506(13) |
| N15  | C28  | 1.484(11) | C35  | C49  | 1.395(13) |
| N15  | C38  | 1.482(11) | C36  | C49  | 1.377(12) |
| N15  | C57  | 1.487(11) | C39  | C40  | 1.494(13) |
| N16  | C36  | 1.367(11) | C41  | C42  | 1.496(13) |
| N16  | C40  | 1.363(12) | C43  | C51  | 1.497(13) |
| N17  | C25  | 1.532(11) | C43  | C54  | 1.393(13) |
| N17  | C46  | 1.481(11) | C44  | C50  | 1.532(13) |
| N17  | C52  | 1.471(11) | C47  | C54  | 1.360(13) |
| N19  | C29  | 1.325(11) | C48  | C56  | 1.388(16) |
| N19  | C43  | 1.360(11) | C48  | C59  | 1.495(15) |
| N20  | C48  | 1.366(13) | C50  | C60  | 1.368(13) |
| N20  | C50  | 1.353(12) | C52  | C57  | 1.518(12) |
| N21  | C31  | 1.504(12) | C56  | C58  | 1.369(16) |
| N21  | C41  | 1.490(11) | C58  | C60  | 1.388(15) |

**Table S26.** Bond Angles for Fe(TMPC).

| Atom | Atom | Atom | Angle/°  | Atom | Atom | Atom | Angle/°   |
|------|------|------|----------|------|------|------|-----------|
| N15  | Fe1  | N16  | 76.0(3)  | F4   | C23  | F6   | 108.5(8)  |
| N15  | Fe1  | N17  | 80.3(3)  | F5   | C23  | S2   | 110.7(7)  |
| N15  | Fe1  | N21  | 77.6(3)  | F6   | C23  | S2   | 111.3(7)  |
| N16  | Fe1  | N17  | 88.2(3)  | F6   | C23  | F5   | 106.7(8)  |
| N16  | Fe1  | N21  | 129.0(3) | C30  | C24  | C25  | 121.0(9)  |
| N19  | Fe1  | N15  | 149.0(3) | N37  | C24  | C25  | 115.9(8)  |
| N19  | Fe1  | N16  | 93.0(3)  | N37  | C24  | C30  | 123.1(9)  |
| N19  | Fe1  | N17  | 128.9(3) | C24  | C25  | N17  | 116.8(7)  |
| N19  | Fe1  | N21  | 88.0(3)  | C35  | C26  | C40  | 120.6(9)  |
| N19  | Fe1  | N22  | 76.2(3)  | C47  | C27  | C29  | 117.3(9)  |
| N21  | Fe1  | N17  | 128.7(3) | N15  | C28  | C36  | 111.6(7)  |
| N22  | Fe1  | N15  | 126.8(3) | N19  | C29  | C27  | 123.0(8)  |
| N22  | Fe1  | N16  | 148.8(3) | N19  | C29  | C61  | 115.9(8)  |
| N22  | Fe1  | N17  | 77.0(3)  | C27  | C29  | C61  | 121.1(8)  |
| N22  | Fe1  | N21  | 80.4(3)  | C24  | C30  | C45  | 119.6(10) |
| O8   | S2   | O12  | 114.8(4) | C38  | C31  | N21  | 111.9(7)  |
| O8   | S2   | O14  | 113.9(4) | C45  | C32  | C33  | 120.2(9)  |
| O8   | S2   | C23  | 104.0(4) | C32  | C33  | C53  | 120.8(10) |
| O12  | S2   | C23  | 104.1(5) | N37  | C33  | C32  | 121.1(10) |
| O14  | S2   | O12  | 115.0(4) | N37  | C33  | C53  | 117.9(9)  |
| O14  | S2   | C23  | 103.0(4) | N22  | C34  | C46  | 111.0(7)  |
| O7   | S3   | O10  | 114.5(4) | C26  | C35  | C49  | 119.0(8)  |
| O7   | S3   | O18  | 115.1(4) | N16  | C36  | C28  | 116.7(8)  |
| O7   | S3   | C55  | 103.4(4) | N16  | C36  | C49  | 122.0(8)  |
| O10  | S3   | O18  | 116.1(5) | C49  | C36  | C28  | 121.3(8)  |
| O10  | S3   | C55  | 102.3(5) | C33  | N37  | C24  | 118.1(9)  |
| O18  | S3   | C55  | 102.8(5) | N15  | C38  | C31  | 111.9(7)  |
| C28  | N15  | Fe1  | 106.5(5) | N16  | C40  | C26  | 120.7(9)  |
| C28  | N15  | C57  | 109.6(7) | N16  | C40  | C39  | 118.0(8)  |
| C38  | N15  | Fe1  | 111.5(5) | C26  | C40  | C39  | 121.3(9)  |
| C38  | N15  | C28  | 110.4(7) | N21  | C41  | C42  | 110.7(7)  |
| C38  | N15  | C57  | 110.7(7) | N22  | C42  | C41  | 110.7(7)  |
| C57  | N15  | Fe1  | 108.0(5) | N19  | C43  | C51  | 118.1(8)  |
| C36  | N16  | Fe1  | 112.3(6) | N19  | C43  | C54  | 120.9(9)  |
| C40  | N16  | Fe1  | 128.8(6) | C54  | C43  | C51  | 121.0(8)  |
| C40  | N16  | C36  | 118.8(8) | N21  | C44  | C50  | 115.1(8)  |

|     |     |     |          |     |     |     |           |
|-----|-----|-----|----------|-----|-----|-----|-----------|
| C25 | N17 | Fe1 | 118.5(5) | C32 | C45 | C30 | 117.7(9)  |
| C46 | N17 | Fe1 | 109.0(5) | N17 | C46 | C34 | 112.4(8)  |
| C46 | N17 | C25 | 107.9(7) | C54 | C47 | C27 | 120.6(9)  |
| C52 | N17 | Fe1 | 100.2(5) | N20 | C48 | C56 | 121.5(10) |
| C52 | N17 | C25 | 110.7(7) | N20 | C48 | C59 | 115.4(10) |
| C52 | N17 | C46 | 110.2(7) | C56 | C48 | C59 | 123.1(10) |
| C29 | N19 | Fe1 | 114.1(6) | C36 | C49 | C35 | 118.8(9)  |
| C29 | N19 | C43 | 118.8(8) | N20 | C50 | C44 | 114.8(8)  |
| C43 | N19 | Fe1 | 126.8(6) | N20 | C50 | C60 | 124.4(9)  |
| C50 | N20 | C48 | 116.6(9) | C60 | C50 | C44 | 120.8(8)  |
| C31 | N21 | Fe1 | 108.3(5) | N17 | C52 | C57 | 110.4(7)  |
| C41 | N21 | Fe1 | 99.2(5)  | C47 | C54 | C43 | 119.2(9)  |
| C41 | N21 | C31 | 109.3(7) | F9  | C55 | S3  | 111.8(7)  |
| C41 | N21 | C44 | 110.7(7) | F9  | C55 | F11 | 107.4(9)  |
| C44 | N21 | Fe1 | 119.9(5) | F9  | C55 | F13 | 107.7(9)  |
| C44 | N21 | C31 | 108.8(7) | F11 | C55 | S3  | 111.7(8)  |
| C34 | N22 | Fe1 | 112.9(5) | F13 | C55 | S3  | 112.0(8)  |
| C42 | N22 | Fe1 | 108.6(5) | F13 | C55 | F11 | 106.0(9)  |
| C42 | N22 | C34 | 109.0(7) | C58 | C56 | C48 | 120.3(10) |
| C61 | N22 | Fe1 | 105.9(5) | N15 | C57 | C52 | 111.1(7)  |
| C61 | N22 | C34 | 109.4(7) | C56 | C58 | C60 | 119.0(10) |
| C61 | N22 | C42 | 111.0(7) | C50 | C60 | C58 | 118.2(9)  |
| F4  | C23 | S2  | 112.0(7) | N22 | C61 | C29 | 108.8(7)  |
| F4  | C23 | F5  | 107.5(8) |     |     |     |           |

**Table S27.** Torsion Angles for Fe(TMPC).

| A   | B   | C   | D   | Angle/°   | A   | B   | C   | D   | Angle/°    |
|-----|-----|-----|-----|-----------|-----|-----|-----|-----|------------|
| Fe1 | N15 | C28 | C36 | 44.7(8)   | N19 | C43 | C54 | C47 | -2.5(13)   |
| Fe1 | N15 | C38 | C31 | 41.2(8)   | N20 | C48 | C56 | C58 | -0.6(16)   |
| Fe1 | N15 | C57 | C52 | 35.4(8)   | N20 | C50 | C60 | C58 | -3.7(16)   |
| Fe1 | N16 | C36 | C28 | 2.1(9)    | N21 | Fe1 | N15 | C28 | 103.4(6)   |
| Fe1 | N16 | C36 | C49 | -179.7(7) | N21 | Fe1 | N15 | C38 | -17.1(5)   |
| Fe1 | N16 | C40 | C26 | -179.5(6) | N21 | Fe1 | N15 | C57 | -139.0(6)  |
| Fe1 | N16 | C40 | C39 | -2.0(12)  | N21 | Fe1 | N16 | C36 | -43.2(7)   |
| Fe1 | N17 | C25 | C24 | -175.5(6) | N21 | Fe1 | N16 | C40 | 135.9(7)   |
| Fe1 | N17 | C46 | C34 | 31.9(9)   | N21 | Fe1 | N17 | C25 | 161.6(6)   |
| Fe1 | N17 | C52 | C57 | 51.2(7)   | N21 | Fe1 | N17 | C46 | -74.5(6)   |
| Fe1 | N19 | C29 | C27 | -171.8(6) | N21 | Fe1 | N17 | C52 | 41.1(6)    |
| Fe1 | N19 | C29 | C61 | 8.6(9)    | N21 | Fe1 | N19 | C29 | 94.7(6)    |
| Fe1 | N19 | C43 | C51 | -5.2(11)  | N21 | Fe1 | N19 | C43 | -79.4(7)   |
| Fe1 | N19 | C43 | C54 | 173.7(6)  | N21 | Fe1 | N22 | C34 | 117.2(6)   |
| Fe1 | N21 | C31 | C38 | 32.2(8)   | N21 | Fe1 | N22 | C42 | -3.8(5)    |
| Fe1 | N21 | C41 | C42 | 52.6(8)   | N21 | Fe1 | N22 | C61 | -123.1(5)  |
| Fe1 | N21 | C44 | C50 | 175.9(6)  | N21 | C31 | C38 | N15 | -49.7(10)  |
| Fe1 | N22 | C34 | C46 | 39.4(9)   | N21 | C41 | C42 | N22 | -63.0(10)  |
| Fe1 | N22 | C42 | C41 | 34.0(8)   | N21 | C44 | C50 | N20 | 75.2(10)   |
| Fe1 | N22 | C61 | C29 | 46.8(7)   | N21 | C44 | C50 | C60 | -104.7(10) |
| O7  | S3  | C55 | F9  | -55.2(9)  | N22 | Fe1 | N15 | C28 | 171.2(5)   |
| O7  | S3  | C55 | F11 | 65.2(8)   | N22 | Fe1 | N15 | C38 | 50.7(6)    |
| O7  | S3  | C55 | F13 | -176.1(8) | N22 | Fe1 | N15 | C57 | -71.2(6)   |
| O8  | S2  | C23 | F4  | 178.4(7)  | N22 | Fe1 | N16 | C36 | 158.9(6)   |
| O8  | S2  | C23 | F5  | -61.8(7)  | N22 | Fe1 | N16 | C40 | -21.9(10)  |
| O8  | S2  | C23 | F6  | 56.7(8)   | N22 | Fe1 | N17 | C25 | -132.2(6)  |
| O10 | S3  | C55 | F9  | 64.0(9)   | N22 | Fe1 | N17 | C46 | -8.3(5)    |
| O10 | S3  | C55 | F11 | -175.6(7) | N22 | Fe1 | N17 | C52 | 107.3(5)   |
| O10 | S3  | C55 | F13 | -57.0(9)  | N22 | Fe1 | N19 | C29 | 14.0(6)    |
| O12 | S2  | C23 | F4  | 57.7(8)   | N22 | Fe1 | N19 | C43 | -160.0(7)  |
| O12 | S2  | C23 | F5  | 177.6(6)  | N22 | Fe1 | N21 | C31 | -139.3(5)  |
| O12 | S2  | C23 | F6  | -63.9(8)  | N22 | Fe1 | N21 | C41 | -25.3(5)   |
| O14 | S2  | C23 | F4  | -62.6(8)  | N22 | Fe1 | N21 | C44 | 95.1(6)    |
| O14 | S2  | C23 | F5  | 57.3(7)   | N22 | C34 | C46 | N17 | -47.8(11)  |
| O14 | S2  | C23 | F6  | 175.8(7)  | C24 | C30 | C45 | C32 | -2.2(13)   |
| N15 | Fe1 | N16 | C36 | 17.6(6)   | C25 | N17 | C46 | C34 | 161.9(7)   |

N15 Fe1 N16 C40 -163.3(8) C25 N17 C52 C57 -74.8(9)  
 N15 Fe1 N17 C25 96.2(6) C25 C24 C30 C45 -175.7(8)  
 N15 Fe1 N17 C46 -139.9(6) C25 C24 N37 C33 177.5(8)  
 N15 Fe1 N17 C52 -24.2(5) C26 C35 C49 C36 0.0(14)  
 N15 Fe1 N19 C29 156.2(6) C27 C29 C61 N22 142.1(8)  
 N15 Fe1 N19 C43 -17.9(10) C27 C47 C54 C43 2.5(14)  
 N15 Fe1 N21 C31 -8.1(5) C28 N15 C38 C31 -77.0(9)  
 N15 Fe1 N21 C41 105.9(5) C28 N15 C57 C52 151.0(7)  
 N15 Fe1 N21 C44 -133.7(6) C28 C36 C49 C35 177.2(9)  
 N15 Fe1 N22 C34 50.7(7) C29 N19 C43 C51 -179.0(8)  
 N15 Fe1 N22 C42 -70.3(6) C29 N19 C43 C54 -0.1(12)  
 N15 Fe1 N22 C61 170.4(5) C29 C27 C47 C54 -0.1(14)  
 N15 C28 C36 N16 -32.2(11) C30 C24 C25 N17 -96.6(10)  
 N15 C28 C36 C49 149.7(8) C30 C24 N37 C33 -0.7(13)  
 N16 Fe1 N15 C28 -32.6(5) C31 N21 C41 C42 165.8(7)  
 N16 Fe1 N15 C38 -153.1(6) C31 N21 C44 C50 50.5(10)  
 N16 Fe1 N15 C57 85.0(6) C32 C33 N37 C24 -1.2(13)  
 N16 Fe1 N17 C25 20.2(6) C33 C32 C45 C30 0.4(14)  
 N16 Fe1 N17 C46 144.0(6) C34 N22 C42 C41 -89.4(9)  
 N16 Fe1 N17 C52 -100.3(5) C34 N22 C61 C29 168.8(7)  
 N16 Fe1 N19 C29 -136.4(6) C35 C26 C40 N16 -0.5(14)  
 N16 Fe1 N19 C43 49.6(7) C35 C26 C40 C39 -177.9(9)  
 N16 Fe1 N21 C31 52.1(6) C36 N16 C40 C26 -0.4(13)  
 N16 Fe1 N21 C41 166.1(5) C36 N16 C40 C39 177.1(8)  
 N16 Fe1 N21 C44 -73.5(7) N37 C24 C25 N17 85.1(10)  
 N16 Fe1 N22 C34 -80.1(8) N37 C24 C30 C45 2.5(14)  
 N16 Fe1 N22 C42 158.9(5) C38 N15 C28 C36 165.9(7)  
 N16 Fe1 N22 C61 39.6(8) C38 N15 C57 C52 -87.0(9)  
 N16 C36 C49 C35 -0.8(14) C40 N16 C36 C28 -177.1(8)  
 N17 Fe1 N15 C28 -123.2(6) C40 N16 C36 C49 1.0(13)  
 N17 Fe1 N15 C38 116.3(6) C40 C26 C35 C49 0.7(14)  
 N17 Fe1 N15 C57 -5.6(5) C41 N21 C31 C38 -74.9(9)  
 N17 Fe1 N16 C36 98.0(6) C41 N21 C44 C50 -69.6(10)  
 N17 Fe1 N16 C40 -82.8(7) C42 N22 C34 C46 160.1(8)  
 N17 Fe1 N19 C29 -46.2(7) C42 N22 C61 C29 -70.9(8)  
 N17 Fe1 N19 C43 139.7(7) C43 N19 C29 C27 2.7(12)  
 N17 Fe1 N21 C31 -74.6(6) C43 N19 C29 C61 -176.8(7)  
 N17 Fe1 N21 C41 39.4(6) C44 N21 C31 C38 164.1(7)

|         |         |           |                 |           |
|---------|---------|-----------|-----------------|-----------|
| N17 Fe1 | N21 C44 | 159.8(6)  | C44 N21 C41 C42 | -74.4(9)  |
| N17 Fe1 | N22 C34 | -16.5(6)  | C44 C50 C60 C58 | 176.2(9)  |
| N17 Fe1 | N22 C42 | -137.4(6) | C45 C32 C33 N37 | 1.3(14)   |
| N17 Fe1 | N22 C61 | 103.3(5)  | C45 C32 C33 C53 | 178.3(9)  |
| N17 C52 | C57 N15 | -63.2(9)  | C46 N17 C25 C24 | 60.1(10)  |
| O18 S3  | C55 F9  | -175.3(8) | C46 N17 C52 C57 | 166.0(7)  |
| O18 S3  | C55 F11 | -54.9(8)  | C47 C27 C29 N19 | -2.6(13)  |
| O18 S3  | C55 F13 | 63.7(9)   | C47 C27 C29 C61 | 176.9(8)  |
| N19 Fe1 | N15 C28 | 39.3(8)   | C48 N20 C50 C44 | -177.0(8) |
| N19 Fe1 | N15 C38 | -81.2(7)  | C48 N20 C50 C60 | 2.9(15)   |
| N19 Fe1 | N15 C57 | 156.9(6)  | C48 C56 C58 C60 | -0.2(16)  |
| N19 Fe1 | N16 C36 | -133.1(6) | C50 N20 C48 C56 | -0.7(14)  |
| N19 Fe1 | N16 C40 | 46.0(8)   | C50 N20 C48 C59 | -179.5(9) |
| N19 Fe1 | N17 C25 | -72.3(7)  | C51 C43 C54 C47 | 176.4(9)  |
| N19 Fe1 | N17 C46 | 51.6(6)   | C52 N17 C25 C24 | -60.6(10) |
| N19 Fe1 | N17 C52 | 167.2(5)  | C52 N17 C46 C34 | -77.1(9)  |
| N19 Fe1 | N21 C31 | 144.3(5)  | C53 C33 N37 C24 | -178.2(8) |
| N19 Fe1 | N21 C41 | -101.7(5) | C56 C58 C60 C50 | 2.2(16)   |
| N19 Fe1 | N21 C44 | 18.8(6)   | C57 N15 C28 C36 | -71.9(9)  |
| N19 Fe1 | N22 C34 | -152.6(6) | C57 N15 C38 C31 | 161.5(7)  |
| N19 Fe1 | N22 C42 | 86.4(6)   | C59 C48 C56 C58 | 178.1(10) |
| N19 Fe1 | N22 C61 | -32.9(5)  | C61 N22 C34 C46 | -78.4(9)  |
| N19 C29 | C61 N22 | -38.3(10) | C61 N22 C42 C41 | 150.1(7)  |

**Table S28.** Hydrogen Atom Coordinates ( $\text{\AA}\times 10^4$ ) and Isotropic Displacement Parameters ( $\text{\AA}^2\times 10^3$ ) for Fe(TMPC).

| Atom | x     | y    | z     | U(eq) |
|------|-------|------|-------|-------|
| H25A | 3342  | 1620 | 4283  | 23    |
| H25B | 3537  | 803  | 3481  | 23    |
| H26  | -1036 | 562  | 3679  | 30    |
| H27  | 1451  | 680  | -584  | 25    |
| H28A | 718   | 4124 | 3772  | 23    |
| H28B | 1560  | 4198 | 4746  | 23    |
| H30  | 5633  | -54  | 3625  | 25    |
| H31A | 2841  | 5323 | 2777  | 23    |
| H31B | 1412  | 4903 | 2925  | 23    |
| H32  | 8231  | 459  | 6059  | 32    |
| H34A | 5920  | 2740 | 2446  | 28    |
| H34B | 5892  | 1767 | 1751  | 28    |
| H35  | -1393 | 1778 | 4836  | 26    |
| H38A | 4275  | 4668 | 3732  | 22    |
| H38B | 3112  | 5159 | 4221  | 22    |
| H39A | -259  | 506  | 1953  | 33    |
| H39B | 436   | -56  | 2605  | 33    |
| H39C | 1427  | 634  | 2358  | 33    |
| H41A | 4578  | 4042 | 2402  | 24    |
| H41B | 3918  | 4392 | 1578  | 24    |
| H42A | 3155  | 2847 | 726   | 24    |
| H42B | 4856  | 2988 | 1079  | 24    |
| H44A | 249   | 3898 | 1462  | 27    |
| H44B | 1250  | 3511 | 812   | 27    |
| H45  | 7484  | -510 | 4612  | 32    |
| H46A | 5048  | 1001 | 2602  | 25    |
| H46B | 6332  | 1706 | 3251  | 25    |
| H47  | -1050 | 761  | -1003 | 29    |
| H49  | -282  | 3264 | 5064  | 26    |
| H51A | -1659 | 2044 | 2011  | 38    |
| H51B | -2055 | 2750 | 1456  | 38    |
| H51C | -590  | 2925 | 2183  | 38    |
| H52A | 5483  | 3324 | 3798  | 20    |
| H52B | 5802  | 2829 | 4551  | 20    |
| H53A | 7016  | 1719 | 7244  | 57    |

|      |       |      |      |    |
|------|-------|------|------|----|
| H53B | 6705  | 2594 | 6902 | 57 |
| H53C | 8262  | 2232 | 7002 | 57 |
| H54  | -2293 | 1489 | 31   | 25 |
| H56  | 1559  | 7149 | 643  | 42 |
| H57A | 3454  | 3114 | 4804 | 24 |
| H57B | 4391  | 4051 | 4974 | 24 |
| H58  | -236  | 6879 | 1330 | 42 |
| H59A | 4452  | 5854 | 358  | 61 |
| H59B | 3647  | 6651 | 48   | 61 |
| H59C | 3279  | 5615 | -544 | 61 |
| H60  | -492  | 5434 | 1593 | 31 |
| H61A | 3384  | 844  | 1331 | 20 |
| H61B | 3719  | 1207 | 563  | 20 |



## Co(TMPC)

**Table S29.** Crystal data and structure refinement for Co(TMPC).

|                                             |                                                                                 |
|---------------------------------------------|---------------------------------------------------------------------------------|
| Identification code                         | Co(TMPC)                                                                        |
| Empirical formula                           | C <sub>36</sub> H <sub>60</sub> Cl <sub>2</sub> CoN <sub>8</sub> O <sub>6</sub> |
| Formula weight                              | 830.75                                                                          |
| Temperature/K                               | 90.0                                                                            |
| Crystal system                              | monoclinic                                                                      |
| Space group                                 | C2/c                                                                            |
| a/Å                                         | 11.3586(7)                                                                      |
| b/Å                                         | 14.8399(10)                                                                     |
| c/Å                                         | 24.1643(16)                                                                     |
| α/°                                         | 90.00                                                                           |
| β/°                                         | 98.4869(10)                                                                     |
| γ/°                                         | 90.00                                                                           |
| Volume/Å <sup>3</sup>                       | 4028.5(5)                                                                       |
| Z                                           | 4                                                                               |
| ρ <sub>calc</sub> /g/cm <sup>3</sup>        | 1.370                                                                           |
| μ/mm <sup>-1</sup>                          | 0.613                                                                           |
| F(000)                                      | 1764.0                                                                          |
| Crystal size/mm <sup>3</sup>                | 0.3 × 0.22 × 0.06                                                               |
| Radiation                                   | MoKα (λ = 0.71073)                                                              |
| 2Θ range for data collection/°              | 3.4 to 67.58                                                                    |
| Index ranges                                | -17 ≤ h ≤ 17, -23 ≤ k ≤ 23, -37 ≤ l ≤ 37                                        |
| Reflections collected                       | 54363                                                                           |
| Independent reflections                     | 8083 [R <sub>int</sub> = 0.0278, R <sub>sigma</sub> = 0.0164]                   |
| Data/restraints/parameters                  | 8083/0/263                                                                      |
| Goodness-of-fit on F <sup>2</sup>           | 1.074                                                                           |
| Final R indexes [I ≥ 2σ (I)]                | R <sub>1</sub> = 0.0298, wR <sub>2</sub> = 0.0792                               |
| Final R indexes [all data]                  | R <sub>1</sub> = 0.0325, wR <sub>2</sub> = 0.0811                               |
| Largest diff. peak/hole / e Å <sup>-3</sup> | 0.75/-0.33                                                                      |

**Table S30.** Fractional Atomic Coordinates ( $\times 10^4$ ) and Equivalent Isotropic Displacement Parameters ( $\text{\AA}^2 \times 10^3$ ) for Co(TMPC).  $U_{\text{eq}}$  is defined as 1/3 of the trace of the orthogonalised  $U_{\text{ij}}$  tensor.

| Atom | x         | y           | z           | U(eq)     |
|------|-----------|-------------|-------------|-----------|
| Co1  | 5000      | 7551.43(10) | 7500        | 6.86(4)   |
| N1   | 5611.1(6) | 6529.1(5)   | 6952.8(3)   | 8.74(11)  |
| N2   | 3829.4(7) | 8572.6(5)   | 5300.5(3)   | 10.71(12) |
| N3   | 6456.1(6) | 8230.5(5)   | 7189.8(3)   | 8.05(11)  |
| N4   | 3991.3(6) | 8245.2(5)   | 6672.9(3)   | 8.04(11)  |
| C1   | 7328.4(7) | 7506.8(5)   | 7128.2(4)   | 10.22(13) |
| C2   | 6691.5(7) | 6731.5(5)   | 6814.1(3)   | 9.32(12)  |
| C3   | 7184.9(8) | 6276.3(6)   | 6402.7(4)   | 12.27(14) |
| C4   | 6541.0(8) | 5571.1(6)   | 6126.2(4)   | 13.84(14) |
| C5   | 5452.8(8) | 5332.5(6)   | 6280.3(4)   | 12.74(14) |
| C6   | 4999.6(7) | 5826.3(5)   | 6693.3(3)   | 10.13(13) |
| C7   | 3821.3(8) | 5581.1(6)   | 6861.8(4)   | 13.54(14) |
| C8   | 6071.5(7) | 8650.6(6)   | 6632.6(3)   | 9.90(13)  |
| C9   | 4812.3(7) | 9001.2(5)   | 6601.4(3)   | 9.58(13)  |
| C10  | 3734.3(7) | 7693.9(5)   | 6147.9(3)   | 9.34(12)  |
| C11  | 3119.1(7) | 8200.3(5)   | 5640.9(3)   | 9.19(12)  |
| C12  | 1882.7(7) | 8272.2(6)   | 5538.2(3)   | 11.48(13) |
| C13  | 1364.2(8) | 8791.7(6)   | 5085.8(4)   | 14.03(14) |
| C14  | 2096.3(8) | 9201.4(6)   | 4750.3(4)   | 14.96(15) |
| C15  | 3326.5(8) | 9058.3(6)   | 4857.8(3)   | 12.76(14) |
| C16  | 4123.3(9) | 9430.8(7)   | 4469.7(4)   | 19.35(17) |
| C17  | 2857.2(7) | 8600.1(5)   | 6817.7(3)   | 9.68(13)  |
| C18  | 2997.0(7) | 8932.6(5)   | 7415.9(3)   | 9.77(13)  |
| O2   | 6217.6(7) | 7859.0(7)   | 5336.1(3)   | 24.64(16) |
| O1   | 8615.8(8) | 8424.1(6)   | 5561.3(4)   | 26.74(17) |
| O4   | 5000      | 10810.3(8)  | 7500        | 35.1(3)   |
| O3   | 0         | 8734.1(8)   | 7500        | 21.6(2)   |
| Cl1  | 161.1(2)  | 7271.96(19) | 6540.32(10) | 20.92(5)  |

**Table S31.** Anisotropic Displacement Parameters ( $\text{\AA}^2 \times 10^3$ ) for Co(TMPC). The Anisotropic displacement factor exponent takes the form:  $-2\pi^2[h^2a^*^2U_{11}+2hka^*b^*U_{12}+\dots]$ .

| Atom | $U_{11}$  | $U_{22}$  | $U_{33}$  | $U_{23}$ | $U_{13}$ | $U_{12}$ |
|------|-----------|-----------|-----------|----------|----------|----------|
| Co1  | 6.47(6)   | 5.87(6)   | 8.40(7)   | 0        | 1.56(5)  | 0        |
| N1   | 8.0(3)    | 7.9(3)    | 10.0(3)   | 0.2(2)   | 0.5(2)   | -0.2(2)  |
| N2   | 13.1(3)   | 10.5(3)   | 8.4(3)    | 0.2(2)   | 0.8(2)   | -1.6(2)  |
| N3   | 8.3(3)    | 8.1(3)    | 7.7(3)    | -0.5(2)  | 0.7(2)   | -0.5(2)  |
| N4   | 8.1(3)    | 7.4(3)    | 8.4(3)    | -0.2(2)  | 0.5(2)   | -0.4(2)  |
| C1   | 7.3(3)    | 10.6(3)   | 12.7(3)   | -2.5(2)  | 1.4(2)   | -0.5(2)  |
| C2   | 8.6(3)    | 8.7(3)    | 10.5(3)   | -0.8(2)  | 1.1(2)   | 0.3(2)   |
| C3   | 12.0(3)   | 12.0(3)   | 13.1(3)   | -2.3(3)  | 2.9(3)   | 1.6(3)   |
| C4   | 15.9(4)   | 12.0(3)   | 13.4(3)   | -3.1(3)  | 1.5(3)   | 3.0(3)   |
| C5   | 15.0(3)   | 8.6(3)    | 13.5(3)   | -2.0(2)  | -1.4(3)  | 0.6(3)   |
| C6   | 10.9(3)   | 7.4(3)    | 11.1(3)   | 1.0(2)   | -1.5(2)  | -0.4(2)  |
| C7   | 12.9(3)   | 13.1(3)   | 14.0(3)   | 1.2(3)   | -0.2(3)  | -4.7(3)  |
| C8   | 9.8(3)    | 11.7(3)   | 8.2(3)    | 1.1(2)   | 0.9(2)   | -2.1(2)  |
| C9   | 11.0(3)   | 7.8(3)    | 9.5(3)    | 1.0(2)   | 0.2(2)   | -1.8(2)  |
| C10  | 11.1(3)   | 7.9(3)    | 8.5(3)    | 0.2(2)   | -0.3(2)  | -0.2(2)  |
| C11  | 11.0(3)   | 8.0(3)    | 8.1(3)    | -0.2(2)  | -0.2(2)  | -1.0(2)  |
| C12  | 11.3(3)   | 12.6(3)   | 10.1(3)   | -0.6(2)  | -0.1(2)  | -1.0(3)  |
| C13  | 13.1(3)   | 15.3(4)   | 12.4(3)   | -0.7(3)  | -2.7(3)  | 1.4(3)   |
| C14  | 18.9(4)   | 13.7(3)   | 10.9(3)   | 2.1(3)   | -2.5(3)  | 0.8(3)   |
| C15  | 17.7(4)   | 11.2(3)   | 8.9(3)    | 0.6(2)   | 0.1(3)   | -2.3(3)  |
| C16  | 24.4(4)   | 21.7(4)   | 12.1(4)   | 3.9(3)   | 3.1(3)   | -5.7(3)  |
| C17  | 8.0(3)    | 11.0(3)   | 9.6(3)    | 0.8(2)   | -0.2(2)  | 2.2(2)   |
| C18  | 10.3(3)   | 9.2(3)    | 9.5(3)    | 1.0(2)   | 0.4(2)   | 3.3(2)   |
| O2   | 15.7(3)   | 38.0(5)   | 19.9(3)   | -6.8(3)  | 1.6(3)   | 4.6(3)   |
| O1   | 20.4(4)   | 29.3(4)   | 30.2(4)   | 1.5(3)   | 2.8(3)   | -1.4(3)  |
| O4   | 68(1)     | 12.3(5)   | 23.1(6)   | 0        | 1.1(6)   | 0        |
| O3   | 16.3(4)   | 15.8(4)   | 32.0(6)   | 0        | 1.3(4)   | 0        |
| Cl1  | 16.76(10) | 28.77(12) | 17.89(10) | -1.33(8) | 4.75(8)  | -8.54(8) |

**Table S32.** Bond Lengths for Co(TMPC).

| Atom | Atom             | Length/Å   | Atom | Atom            | Length/Å   |
|------|------------------|------------|------|-----------------|------------|
| Co1  | N1               | 2.1915(7)  | C1   | C2              | 1.5037(11) |
| Co1  | N1 <sup>1</sup>  | 2.1915(7)  | C2   | C3              | 1.3868(11) |
| Co1  | N3               | 2.1631(7)  | C3   | C4              | 1.3901(12) |
| Co1  | N3 <sup>1</sup>  | 2.1631(7)  | C4   | C5              | 1.3884(13) |
| Co1  | N4               | 2.3857(7)  | C5   | C6              | 1.3963(12) |
| Co1  | N4 <sup>1</sup>  | 2.3857(7)  | C6   | C7              | 1.5001(12) |
| N1   | C2               | 1.3528(10) | C8   | C9              | 1.5133(12) |
| N1   | C6               | 1.3546(10) | C10  | C11             | 1.5170(11) |
| N2   | C11              | 1.3522(11) | C11  | C12             | 1.3937(11) |
| N2   | C15              | 1.3452(11) | C12  | C13             | 1.3951(12) |
| N3   | C1               | 1.4835(11) | C13  | C14             | 1.3846(13) |
| N3   | C8               | 1.4894(10) | C14  | C15             | 1.3993(13) |
| N3   | C18 <sup>1</sup> | 1.4848(10) | C15  | C16             | 1.5015(13) |
| N4   | C9               | 1.4852(10) | C17  | C18             | 1.5135(11) |
| N4   | C10              | 1.5017(10) | C18  | N3 <sup>1</sup> | 1.4849(10) |
| N4   | C17              | 1.4805(10) |      |                 |            |

<sup>1</sup>1-X,+Y,3/2-Z

**Table S33.** Bond Angles for Co(TMPC).

| Atom             | Atom | Atom             | Angle/°   | Atom            | Atom | Atom | Angle/°   |
|------------------|------|------------------|-----------|-----------------|------|------|-----------|
| N1 <sup>1</sup>  | Co1  | N1               | 92.37(4)  | C17             | N4   | Co1  | 106.42(5) |
| N1               | Co1  | N4 <sup>1</sup>  | 130.43(2) | C17             | N4   | C9   | 110.00(6) |
| N1 <sup>1</sup>  | Co1  | N4 <sup>1</sup>  | 87.08(2)  | C17             | N4   | C10  | 109.03(6) |
| N1               | Co1  | N4               | 87.08(2)  | N3              | C1   | C2   | 109.02(6) |
| N1 <sup>1</sup>  | Co1  | N4               | 130.43(2) | N1              | C2   | C1   | 115.55(7) |
| N3 <sup>1</sup>  | Co1  | N1 <sup>1</sup>  | 77.70(3)  | N1              | C2   | C3   | 123.15(7) |
| N3 <sup>1</sup>  | Co1  | N1               | 149.10(3) | C3              | C2   | C1   | 121.29(7) |
| N3               | Co1  | N1               | 77.70(3)  | C2              | C3   | C4   | 118.14(8) |
| N3               | Co1  | N1 <sup>1</sup>  | 149.10(3) | C5              | C4   | C3   | 119.29(8) |
| N3 <sup>1</sup>  | Co1  | N3               | 124.47(4) | C4              | C5   | C6   | 119.64(8) |
| N3 <sup>1</sup>  | Co1  | N4 <sup>1</sup>  | 78.80(2)  | N1              | C6   | C5   | 121.13(8) |
| N3               | Co1  | N4 <sup>1</sup>  | 78.00(2)  | N1              | C6   | C7   | 118.56(7) |
| N3               | Co1  | N4               | 78.81(2)  | C5              | C6   | C7   | 120.30(7) |
| N3 <sup>1</sup>  | Co1  | N4               | 78.00(2)  | N3              | C8   | C9   | 109.76(6) |
| N4               | Co1  | N4 <sup>1</sup>  | 128.86(3) | N4              | C9   | C8   | 109.85(6) |
| C2               | N1   | Co1              | 112.05(5) | N4              | C10  | C11  | 114.91(6) |
| C2               | N1   | C6               | 118.57(7) | N2              | C11  | C10  | 116.65(7) |
| C6               | N1   | Co1              | 128.75(6) | N2              | C11  | C12  | 122.44(7) |
| C15              | N2   | C11              | 118.76(8) | C12             | C11  | C10  | 120.91(7) |
| C1               | N3   | Co1              | 104.69(5) | C11             | C12  | C13  | 118.66(8) |
| C1               | N3   | C8               | 108.88(6) | C14             | C13  | C12  | 118.74(8) |
| C1               | N3   | C18 <sup>1</sup> | 110.48(6) | C13             | C14  | C15  | 119.62(8) |
| C8               | N3   | Co1              | 111.77(5) | N2              | C15  | C14  | 121.61(8) |
| C18 <sup>1</sup> | N3   | Co1              | 111.92(5) | N2              | C15  | C16  | 118.01(8) |
| C18 <sup>1</sup> | N3   | C8               | 109.00(6) | C14             | C15  | C16  | 120.37(8) |
| C9               | N4   | Co1              | 101.03(4) | N4              | C17  | C18  | 111.67(6) |
| C9               | N4   | C10              | 111.12(6) | N3 <sup>1</sup> | C18  | C17  | 111.05(6) |
| C10              | N4   | Co1              | 118.82(5) |                 |      |      |           |

<sup>1</sup>1-X,+Y,3/2-Z

**Table S34.** Torsion Angles for Co(TMPC).

| A               | B   | C   | D                | Angle/°    | A               | B   | C   | D                | Angle/°    |
|-----------------|-----|-----|------------------|------------|-----------------|-----|-----|------------------|------------|
| Co1             | N1  | C2  | C1               | 9.58(8)    | N4 <sup>1</sup> | Co1 | N1  | C6               | 141.46(6)  |
| Co1             | N1  | C2  | C3               | -169.06(7) | N4              | Co1 | N1  | C6               | -77.10(7)  |
| Co1             | N1  | C6  | C5               | 168.41(6)  | N4              | Co1 | N3  | C1               | -123.45(5) |
| Co1             | N1  | C6  | C7               | -12.07(11) | N4 <sup>1</sup> | Co1 | N3  | C1               | 102.44(5)  |
| Co1             | N3  | C1  | C2               | 49.03(7)   | N4              | Co1 | N3  | C8               | -5.74(5)   |
| Co1             | N3  | C8  | C9               | 35.30(7)   | N4 <sup>1</sup> | Co1 | N3  | C8               | -139.85(5) |
| Co1             | N4  | C9  | C8               | 50.38(6)   | N4 <sup>1</sup> | Co1 | N3  | C18 <sup>1</sup> | -17.26(5)  |
| Co1             | N4  | C10 | C11              | -178.49(5) | N4              | Co1 | N3  | C18 <sup>1</sup> | 116.85(5)  |
| Co1             | N4  | C17 | C18              | 34.62(7)   | N4 <sup>1</sup> | Co1 | N4  | C9               | 40.55(4)   |
| N1 <sup>1</sup> | Co1 | N1  | C2               | -136.10(6) | N4 <sup>1</sup> | Co1 | N4  | C10              | 162.30(6)  |
| N1 <sup>1</sup> | Co1 | N1  | C6               | 53.27(6)   | N4 <sup>1</sup> | Co1 | N4  | C17              | -74.33(5)  |
| N1              | Co1 | N3  | C1               | -34.02(5)  | N4              | C10 | C11 | N2               | 93.07(9)   |
| N1 <sup>1</sup> | Co1 | N3  | C1               | 39.61(7)   | N4              | C10 | C11 | C12              | -86.87(9)  |
| N1 <sup>1</sup> | Co1 | N3  | C8               | 157.32(5)  | N4              | C17 | C18 | N3 <sup>1</sup>  | -52.60(9)  |
| N1              | Co1 | N3  | C8               | 83.69(5)   | C1              | N3  | C8  | C9               | 150.47(6)  |
| N1 <sup>1</sup> | Co1 | N3  | C18 <sup>1</sup> | -80.09(7)  | C1              | C2  | C3  | C4               | -179.45(8) |
| N1              | Co1 | N3  | C18 <sup>1</sup> | -153.72(5) | C2              | N1  | C6  | C5               | -1.69(12)  |
| N1              | Co1 | N4  | C9               | -101.91(5) | C2              | N1  | C6  | C7               | 177.83(7)  |
| N1 <sup>1</sup> | Co1 | N4  | C9               | 167.46(4)  | C2              | C3  | C4  | C5               | -1.76(13)  |
| N1 <sup>1</sup> | Co1 | N4  | C10              | -70.79(6)  | C3              | C4  | C5  | C6               | 2.62(13)   |
| N1              | Co1 | N4  | C10              | 19.84(6)   | C4              | C5  | C6  | N1               | -0.90(12)  |
| N1 <sup>1</sup> | Co1 | N4  | C17              | 52.58(6)   | C4              | C5  | C6  | C7               | 179.59(8)  |
| N1              | Co1 | N4  | C17              | 143.22(5)  | C6              | N1  | C2  | C1               | -178.74(7) |
| N1              | C2  | C3  | C4               | -0.89(13)  | C6              | N1  | C2  | C3               | 2.62(12)   |
| N2              | C11 | C12 | C13              | -3.85(12)  | C8              | N3  | C1  | C2               | -70.64(8)  |
| N3 <sup>1</sup> | Co1 | N1  | C2               | 154.13(5)  | C9              | N4  | C10 | C11              | -61.96(9)  |
| N3              | Co1 | N1  | C2               | 14.35(5)   | C9              | N4  | C17 | C18              | -74.01(8)  |
| N3              | Co1 | N1  | C6               | -156.28(7) | C10             | N4  | C9  | C8               | -76.62(8)  |
| N3 <sup>1</sup> | Co1 | N1  | C6               | -16.49(10) | C10             | N4  | C17 | C18              | 163.91(6)  |
| N3 <sup>1</sup> | Co1 | N3  | C1               | 169.69(5)  | C10             | C11 | C12 | C13              | 176.09(8)  |
| N3 <sup>1</sup> | Co1 | N3  | C8               | -72.60(5)  | C11             | N2  | C15 | C14              | 1.41(12)   |
| N3 <sup>1</sup> | Co1 | N3  | C18 <sup>1</sup> | 49.99(5)   | C11             | N2  | C15 | C16              | -177.25(8) |
| N3              | Co1 | N4  | C9               | -23.87(5)  | C11             | C12 | C13 | C14              | 1.22(13)   |
| N3 <sup>1</sup> | Co1 | N4  | C9               | 105.32(5)  | C12             | C13 | C14 | C15              | 2.48(13)   |
| N3 <sup>1</sup> | Co1 | N4  | C10              | -132.93(6) | C13             | C14 | C15 | N2               | -3.92(13)  |
| N3              | Co1 | N4  | C10              | 97.88(6)   | C13             | C14 | C15 | C16              | 174.70(9)  |

|                 |     |    |     |            |                  |    |     |     |            |
|-----------------|-----|----|-----|------------|------------------|----|-----|-----|------------|
| N3              | Co1 | N4 | C17 | -138.75(5) | C15              | N2 | C11 | C10 | -177.42(7) |
| N3 <sup>1</sup> | Co1 | N4 | C17 | -9.56(5)   | C15              | N2 | C11 | C12 | 2.52(12)   |
| N3              | C1  | C2 | N1  | -40.53(9)  | C17              | N4 | C9  | C8  | 162.55(6)  |
| N3              | C1  | C2 | C3  | 138.14(8)  | C17              | N4 | C10 | C11 | 59.44(8)   |
| N3              | C8  | C9 | N4  | -60.89(8)  | C18 <sup>1</sup> | N3 | C1  | C2  | 169.69(6)  |
| N4              | Co1 | N1 | C2  | 93.52(6)   | C18 <sup>1</sup> | N3 | C8  | C9  | -88.94(7)  |
| N4 <sup>1</sup> | Co1 | N1 | C2  | -47.92(7)  |                  |    |     |     |            |

<sup>1</sup>1-X,+Y,3/2-Z

**Table S35.** Hydrogen Atom Coordinates ( $\text{\AA}\times 10^4$ ) and Isotropic Displacement Parameters ( $\text{\AA}^2\times 10^3$ ) for Co(TMPC).

| Atom | x        | y         | z       | U(eq) |
|------|----------|-----------|---------|-------|
| H1A  | 7711     | 7303      | 7502    | 12    |
| H1B  | 7956     | 7739      | 6922    | 12    |
| H3   | 7942     | 6442      | 6312    | 15    |
| H4   | 6842     | 5256      | 5835    | 17    |
| H5   | 5019     | 4836      | 6106    | 15    |
| H7A  | 3951     | 5216      | 7203    | 20    |
| H7B  | 3353     | 5236      | 6561    | 20    |
| H7C  | 3390     | 6132      | 6932    | 20    |
| H8A  | 6108     | 8199      | 6334    | 12    |
| H8B  | 6614     | 9153      | 6575    | 12    |
| H9A  | 4777     | 9456      | 6898    | 11    |
| H9B  | 4565     | 9295      | 6235    | 11    |
| H10A | 3229     | 7176      | 6221    | 11    |
| H10B | 4495     | 7449      | 6058    | 11    |
| H12  | 1403     | 7973      | 5771    | 14    |
| H13  | 525      | 8863      | 5009    | 17    |
| H14  | 1765     | 9577      | 4449    | 18    |
| H16A | 4956     | 9319      | 4626    | 29    |
| H16B | 3991     | 10081     | 4426    | 29    |
| H16C | 3943     | 9136      | 4104    | 29    |
| H17A | 2247     | 8119      | 6765    | 12    |
| H17B | 2577     | 9102      | 6562    | 12    |
| H18A | 3503     | 9479      | 7454    | 12    |
| H18B | 2207     | 9098      | 7511    | 12    |
| H2A  | 6185(18) | 7512(12)  | 5080(9) | 37    |
| H2B  | 5547(17) | 8044(13)  | 5305(8) | 37    |
| H1C  | 7915(18) | 8340(13)  | 5535(8) | 40    |
| H1D  | 8923(17) | 8119(14)  | 5851(8) | 40    |
| H4A  | 4852(19) | 11105(14) | 7757(8) | 47(6) |
| H3A  | 32(15)   | 8381(11)  | 7225(7) | 27(4) |
